# Supplementary material for: Development and validation of an early warning score to identify COVID-19 in the emergency department based on routine laboratory tests: a multicentre case–control study
Source: PubMed Central journal article supplement — BMJ Open. 2022 Aug 2;12(8):e059111. doi: 10.1136/bmjopen-2021-059111 (PMC9352566; doi:10.1136/bmjopen-2021-059111), 2022-08-02
Supplement: bmjopen-2021-059111.draft_revisions.pdf [file bmjopen-2021-059111.draft_revisions.pdf]

# BMJ Open

BMJ Open is committed to open peer review. As part of this commitment we make the peer review history of every article we publish publicly available.

When an article is published we post the peer reviewers' comments and the authors' responses online. We also post the versions of the paper that were used during peer review. These are the versions that the peer review comments apply to.

The versions of the paper that follow are the versions that were submitted during the peer review process. They are not the versions of record or the final published versions. They should not be cited or distributed as the published version of this manuscript.

BMJ Open is an open access journal and the full, final, typeset and author-corrected version of record of the manuscript is available on our site with no access controls, subscription charges or pay-per-view fees (<http://bmjopen.bmj.com>).

If you have any questions on BMJ Open's open peer review process please email [info.bmjopen@bmj.com](mailto:info.bmjopen@bmj.com)

# BMJ Open

## Development and validation of an early warning score to identify COVID-19 in the emergency department based on routine laboratory tests: a multicenter case-control study

|                               |                                                                                                                                                                                                                                                                                                                                                                                                                                                                                                                                                                                                                                                                                                                                                                                                                                                              |
|-------------------------------|--------------------------------------------------------------------------------------------------------------------------------------------------------------------------------------------------------------------------------------------------------------------------------------------------------------------------------------------------------------------------------------------------------------------------------------------------------------------------------------------------------------------------------------------------------------------------------------------------------------------------------------------------------------------------------------------------------------------------------------------------------------------------------------------------------------------------------------------------------------|
| Journal:                      | <i>BMJ Open</i>                                                                                                                                                                                                                                                                                                                                                                                                                                                                                                                                                                                                                                                                                                                                                                                                                                              |
| Manuscript ID                 | bmjopen-2021-059111                                                                                                                                                                                                                                                                                                                                                                                                                                                                                                                                                                                                                                                                                                                                                                                                                                          |
| Article Type:                 | Original research                                                                                                                                                                                                                                                                                                                                                                                                                                                                                                                                                                                                                                                                                                                                                                                                                                            |
| Date Submitted by the Author: | 10-Nov-2021                                                                                                                                                                                                                                                                                                                                                                                                                                                                                                                                                                                                                                                                                                                                                                                                                                                  |
| Complete List of Authors:     | Boer, Arjen-Kars; Catharina Hospital Deneer, Ruben; Catharina Hospital, ; Eindhoven University of Technology, Maas, Maaïke; Catharina Ziekenhuis, emergency department Ammerlaan, Heidi; Catharina Hospital van Balkom, Roland; Catharina Hospital Thijssen, Wendy; Catharina ziekenhuis, Emergency medicine Bennenbroek, Sophie; Catharina Hospital Leers, Mathie; Zuyderland Medical Centre Heerlen, Clinical Chemistry & Hematology Martens, Remy; Zuyderland Medical Centre Heerlen, Clinical Chemistry & Hematology Buijs, Madelon; Atalmedial Kerremans, Jos; Alrijne Hospital Location Leiderdorp Messchaert, Muriël ; Gelre Hospitals van Suijlen, Jeroen; Gelre Hospitals van Riel, Natal; Eindhoven University of Technology, ; Amsterdam University Medical Centres Scharnhorst, Volkher; Catharina Hospital; Eindhoven University of Technology, |
| Keywords:                     | COVID-19, STATISTICS & RESEARCH METHODS, ACCIDENT & EMERGENCY MEDICINE, Clinical chemistry < PATHOLOGY, Health informatics < BIOTECHNOLOGY & BIOINFORMATICS                                                                                                                                                                                                                                                                                                                                                                                                                                                                                                                                                                                                                                                                                                  |
|                               |                                                                                                                                                                                                                                                                                                                                                                                                                                                                                                                                                                                                                                                                                                                                                                                                                                                              |

SCHOLARONE™  
Manuscripts

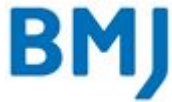

I, the Submitting Author has the right to grant and does grant on behalf of all authors of the Work (as defined in the below author licence), an exclusive licence and/or a non-exclusive licence for contributions from authors who are: i) UK Crown employees; ii) where BMJ has agreed a CC-BY licence shall apply, and/or iii) in accordance with the terms applicable for US Federal Government officers or employees acting as part of their official duties; on a worldwide, perpetual, irrevocable, royalty-free basis to BMJ Publishing Group Ltd ("BMJ") its licensees and where the relevant Journal is co-owned by BMJ to the co-owners of the Journal, to publish the Work in this journal and any other BMJ products and to exploit all rights, as set out in our [licence](#).

The Submitting Author accepts and understands that any supply made under these terms is made by BMJ to the Submitting Author unless you are acting as an employee on behalf of your employer or a postgraduate student of an affiliated institution which is paying any applicable article publishing charge ("APC") for Open Access articles. Where the Submitting Author wishes to make the Work available on an Open Access basis (and intends to pay the relevant APC), the terms of reuse of such Open Access shall be governed by a Creative Commons licence – details of these licences and which [Creative Commons](#) licence will apply to this Work are set out in our licence referred to above.

Other than as permitted in any relevant BMJ Author's Self Archiving Policies, I confirm this Work has not been accepted for publication elsewhere, is not being considered for publication elsewhere and does not duplicate material already published. I confirm all authors consent to publication of this Work and authorise the granting of this licence.

1  
2  
3  
4 1 **Development and validation of an early warning score to identify**  
5  
6 2 **COVID-19 in the emergency department based on routine laboratory**  
7  
8  
9 3 **tests: a multicenter case-control study**  
10  
11  
12 4

15 5 Arjen-Kars Boer<sup>1\*</sup>, Ruben Deneer<sup>1,2\*\*</sup>, Maaïke Maas<sup>3</sup>, Heidi S. M. Ammerlaan<sup>4</sup>, Roland H. H.  
16  
17 6 van Balkom<sup>5</sup>, Wendy A.M.H. Thijssen<sup>3</sup>, Sophie Bennenbroek<sup>3</sup>, Mathie P. G. Leers<sup>6</sup>, Remy  
18  
19 7 J.H. Martens<sup>6</sup>, Madelon M. Buijs<sup>7</sup>, Jos J. Kerremans<sup>8</sup>, Muriël Messchaert<sup>9</sup>, Jeroen D.E. van  
20  
21  
22 8 Suijlen<sup>9</sup>, Natal A.W. van Riel<sup>2,10</sup> and Volkher Scharnhorst<sup>1,2</sup>  
23  
24  
25 9

26  
27  
28 10 \* Both authors contributed equally  
29

30  
31 11 † Corresponding author  
32  
33  
34 12

35  
36  
37 13 1 Department of Laboratory Medicine, Catharina Hospital Eindhoven,  
38  
39 14 Michelangelolaan 2, 5623 EJ, Eindhoven, the Netherlands

40  
41 15 2 Faculty of Biomedical Engineering, Technical University Eindhoven, Groene  
42  
43 16 Loper 3, 5612 AE, Eindhoven, the Netherlands

44  
45  
46 17 3 Department of Emergency Medicine, Catharina Hospital Eindhoven,  
47  
48 18 Michelangelolaan 2, 5623 EJ, Eindhoven, the Netherlands

49  
50 19 4 Department of Internal Medicine, Catharina Hospital Eindhoven,  
51  
52 20 Michelangelolaan 2, 5623 EJ, Eindhoven, the Netherlands

53  
54  
55 21 5 Department of Pulmonary Diseases, Catharina Hospital Eindhoven,  
56  
57 22 Michelangelolaan 2, 5623 EJ, Eindhoven, the Netherlands  
58  
59  
60

- 1  
2  
3 23 6 Department of Laboratory Medicine, Zuyderland Medical Center, Dr. H. van der  
4  
5 24 Hoffplein 1, 6162 BG, Sittard-Geleen, the Netherlands  
6  
7 25 7 Atalmedial Diagnostic Centers, Jan Tooropstraat 138, 1061 AD Amsterdam, the  
8  
9 Netherlands  
10 26  
11  
12 27 8 Department of Medical Microbiology & Infection Prevention, Alrijne Hospital,  
13  
14 28 Simon Smitweg 1, 2353 GA Leiderdorp, the Netherlands  
15  
16  
17 29 9 Department of Clinical Chemistry, Gelre Hospital, Albert Schweitzerlaan 31, 7334  
18  
19 30 DZ Apeldoorn, the Netherlands  
20  
21 31 10 Amsterdam University Medical Centers, University of Amsterdam, Meibergdreef  
22  
23 32 9, 1105 AZ Amsterdam, the Netherlands.  
24  
25  
26  
27 33  
28  
29

30 **Word count: 3645**  
31  
32  
33  
34

### 35 **Keywords**

36  
37 COVID-19, SARS-CoV-2, emergency department, triage, early warning score, prediction  
38  
39 model, routine laboratory tests  
40  
41  
42  
43  
44  
45

### 46 **Corresponding author**

47  
48  
49 Ruben Deneer

50  
51  
52 Michelangelolaan 2

53  
54  
55 5623 EJ Eindhoven, the Netherlands

56  
57  
58 [ruben.deneer@catharinaziekenhuis.nl](mailto:ruben.deneer@catharinaziekenhuis.nl)  
59  
60

## 45 **Abstract**

46 **Objectives:** Identifying patients with a possible SARS-CoV-2 infection in the emergency  
47 department (ED) is challenging. Symptoms differ, incidence rates vary and test capacity may  
48 be limited. As PCR testing all ED patients is neither feasible nor effective in most centers, a  
49 rapid, objective, low-cost early warning score to triage ED patients for a possible infection is  
50 developed.

51 **Design:** Case-control study.

52 **Setting:** Secondary and tertiary hospitals in the Netherlands.

53 **Participants:** Patients presenting at the ED with venous blood sampling from July 2019 to  
54 July 2020 (N = 10417, 279 SARS-CoV-2 positive). The temporal validation cohort covered  
55 the period from July 2020 to October 2021 (N = 14080, 1093 SARS-CoV-2 positive). The  
56 external validation cohort consisted of patients presenting at the ED of three hospitals in the  
57 Netherlands (N = 12061, 652 SARS-CoV-2 positive).

58 **Primary outcome measures** The primary outcome was one or more positive SARS-CoV-2  
59 PCR-test results, within one day prior to, or one week after, ED presentation.

60 **Results:** The resulting “CoLab-score” consists of 10 routine laboratory measurements, and  
61 age. The score showed good discriminative ability (AUC: 0.930, 95% CI: 0.909 to 0.945).  
62 The lowest CoLab-score had a high sensitivity for COVID-19 (0.984, 95% CI: 0.970 to 0.991,  
63 specificity: 0.411, 95% CI: 0.285 to 0.520). Conversely, the highest score had high specificity  
64 (0.978, 95% CI: 0.973 to 0.983, sensitivity: 0.608, 95% CI: 0.522 to 0.685). Results were  
65 confirmed in temporal and external validation.

66 **Conclusions:** The CoLab-score is based on routine laboratory measurements and is available  
67 within one hour after presentation. Depending on the prevalence, COVID-19 may be safely

1  
2  
3 68 ruled-out in over one third of ED presentations. Highly suspect cases can be identified  
4  
5 69 regardless of presenting symptoms. The CoLab-score is a valuable tool to guide PCR testing,  
6  
7 70 triage ED patients, and is available to any center with access to routine laboratory tests.  
8  
9  
10  
11 71

## 12 13 72 **Article summary**

### 14 15 16 73 Strengths and limitations of this study

- 17  
18  
19 74 • A comprehensive panel of 28 laboratory tests was measured for 10.417 emergency  
20  
21 75 department (ED) presentations and combined with SARS-CoV-2 PCR test results.
- 22  
23 76 • Using regression analysis, a simple score was developed consisting of only 10 routine  
24  
25 77 ED laboratory tests and age.
- 26  
27 78 • The score was temporally and externally validation in 3 other centers, is available  
28  
29 79 within 1 hour after presentation and can be used to triage patients with a possible SARS-  
30  
31 80 CoV-2 infection in the ED.
- 32  
33 81 • No evidence was found that the performance was affected by vaccinations and new  
34  
35 82 SARS-CoV-2 variants.
- 36  
37 83 • The score is not a replacement for PCR-testing, but can be used to guide PCR-testing.  
38  
39  
40  
41  
42  
43 84

## 85 Introduction

86 COVID-19, caused by the severe acute respiratory syndrome coronavirus 2 (SARS-CoV-2),  
87 has evolved into a global pandemic in 2020 [1]. For emergency department (ED) physicians,  
88 identifying presenting patients with a possible COVID-19 infection remains challenging since  
89 symptoms like fever, shortness of breath or coughing overlap with other illnesses [2,3]. It is  
90 crucial however, to identify a possible COVID-19 infection as early as possible. Early  
91 identification prevents further spreading and protects hospital staff by isolating a suspected  
92 patient, pending the results of a SARS-COV-2 RNA PCR test and/or chest CT. Conversely,  
93 when PCR testing or isolation treatment capacity is limited, ruling-out COVID-19 as soon as  
94 possible can save valuable resources.

95 In the era of electronic health records and clinical prediction models, developing an early  
96 warning score that can assist ED physicians in identifying patients presenting at the ED with  
97 COVID-19 is of great value. Moreover, if only routine ED test results are required as input,  
98 the score can be easily adopted by EDs worldwide, potentially reduce diagnostic costs and  
99 accelerate patient triage.

100 Many COVID-19 prediction models have already been developed, the living systematic  
101 review by Wynants et. al [4] provides an extensive overview and critical appraisal.

102 Unfortunately, only few models have found their way into routine care at the ED [5,6]. Early  
103 models were based on relatively small sample sizes, hampered by selection bias or were over-  
104 fitted by selecting too many features [4–6]. Aside from methodological shortcomings, most  
105 models are not developed as an early warning score for all ED patients. Firstly, they require  
106 features from tests that are not routinely performed or logged for all ED patients (e.g. the CO-  
107 RADS score from a CT-scan [7] or non-lab based clinical variables in the PRIEST EWS [8])  
108 and are therefore not straightforward to implement or scale to a large ED patient population.



1  
2  
3 109 Secondly, the population on which models are commonly based, are PCR-tested patients, i.e.  
4  
5 110 a pre-selection of a possible COVID-19 infection has already been done by physicians.  
6  
7  
8 111 In this study we report the development and validation of an early warning score that, based  
9  
10 112 on routine ED laboratory tests, estimates the risk of a possible COVID-19 infection in a  
11  
12 113 patient presenting at the ED. The score can assist ED physicians in triaging patients and  
13  
14 114 prevent further transmission of COVID-19 by quickly identifying possibly infected patients or  
15  
16 115 ruling out a possible infection when resources are scarce.  
17  
18  
19  
20  
21  
22  
23  
24  
25  
26  
27  
28  
29  
30  
31  
32  
33  
34  
35  
36  
37  
38  
39  
40  
41  
42  
43  
44  
45  
46  
47  
48  
49  
50  
51  
52  
53  
54  
55  
56  
57  
58  
59  
60

## 116 **Methods**

### 117 *Study design*

118 This is a retrospective case-control study where routine laboratory test results, combined with  
119 age and gender, from all patient presenting at the emergency department (ED) of the  
120 Catharina Hospital Eindhoven from July 2019 to July 2020 were combined with SARS-CoV-  
121 2 PCR test results in a development dataset. A model that could predict the presence of a  
122 COVID-19 infection was fit to this dataset. Performance of the model was assessed by i)  
123 internal validation, ii) temporal validation and iii) external validation by using data from the  
124 ED of three other centers. The study was reviewed by the Medical research Ethics  
125 Committees United (MEC-U) under study number W20.071, which confirmed that the  
126 Medical Research Involving Human Subjects Act (In Dutch: WMO) does not apply to this  
127 study. The study was thereafter reviewed and approved by the internal hospital review board.

128

### 129 *Patient and Public Involvement*

130 Patients were not involved in the design, conduct or reporting of this study.

131

### 132 *Development dataset*

133 All ED presentations at the Catharina Hospital Eindhoven from July 2019 to July 2020 were  
134 included in the development dataset, provided that routine laboratory testing had been  
135 requested by the attending ED physician. The rationale for this inclusion period is to limit the  
136 effect of seasonal variation in the ED patient population by including the summer, fall and  
137 winter season of 2019 (control patients) and the winter, spring and summer season of 2020  
138 (case and control patients). The routine laboratory panel at the ED consists of 28 laboratory  
139 tests. In some cases not all tests in the routine panel were requested or one or more

1  
2  
3 140 quantitative results were not available due to analytical interference (hemolysis, lipemia or  
4  
5 141 icterus). Presentations with one or more missing values in any of the 28 laboratory test in the  
6  
7 142 routine ED panel, were excluded. Presentations with one or more extreme lab results ( $> 10$   
8  
9 143 times standard deviation from the median) were also excluded to minimize the effect on the  
10  
11 144 estimation of regression coefficients. After the first case of COVID-19 in the Netherlands, all  
12  
13 145 patients with symptoms of COVID-19 (either fever and/or respiratory symptoms) were  
14  
15 146 subjected to nasopharyngeal PCR testing for SARS-CoV-2 RNA. PCR testing was performed  
16  
17 147 by commercial tests that were approved by the Dutch national institute of public health  
18  
19 148 (RIVM). If a patient had a positive PCR result in the past, subsequent presentations were  
20  
21 149 excluded as re-presentations might be clinically different from de novo presentations.  
22  
23  
24  
25  
26 150 The ED lab panel results were matched to SARS-CoV-2 PCR results if the underlying  
27  
28 151 nasopharyngeal swab had been taken  $\leq 1$  day prior, or  $\leq 1$  week after initial blood withdrawal  
29  
30 152 at the ED. If multiple PCR tests were performed in this window, and at least one PCR test was  
31  
32 153 positive, the presentation was labelled "*PCR-positive*". If all PCR test results in the time  
33  
34 154 window were negative, the presentation was labelled as "*PCR-negative*". If no PCR tests were  
35  
36 155 performed in the time window and the presentation occurred after the first case of COVID-19  
37  
38 156 in the Netherlands, the presentation was labelled as "*Untested*". All presentations before the  
39  
40 157 first case were labelled as "*Pre-COVID-19*".  
41  
42  
43  
44  
45

158

### 159 ***Laboratory tests***

160 The routine laboratory panel consisted of hemocytometric and chemical analyses. The  
161 hemocytometric tests were performed on Sysmex XN-10 instruments (Sysmex Corp., Kobe,  
162 Japan) and consisted of hemoglobin, hematocrit, erythrocytes, mean corpuscular volume  
163 (MCV), mean cellular hemoglobin (MCH), mean cellular hemoglobin concentration  
164 (MCHC), thrombocytes, leukocytes, neutrophils, eosinophils, basophils, lymphocytes and

8

1  
2  
3 165 monocytes. The chemical analyses were performed on a Cobas 8000 Pro (Roche Dx, Basel,  
4  
5 166 Switzerland) instrument and consisted of glucose, total bilirubin, aspartate aminotransferase  
6  
7 167 (ASAT), alanine aminotransferase (ALAT), lactate dehydrogenase (LD), creatine kinase  
8  
9 168 (CK), alkaline phosphatase (ALP), gamma-glutamyltransferase (gGT), blood urea nitrogen  
10  
11 169 (BUN), creatinine, CKD-epi estimated glomerular filtration rate (eGFR), potassium, sodium,  
12  
13 170 chloride, albumin (bromocresol green) and C-reactive protein (CRP). These results were  
14  
15 171 combined with age and gender.  
16  
17  
18  
19  
20 172

### 21 22 23 173 *Modelling*

24  
25 174 All data were processed and analyzed in R version 4.1.1 [9]. Laboratory results, combined  
26  
27 175 with age and gender were used as covariates in a regression model. Cases were defined as ED  
28  
29 176 presentations labelled as “PCR-positive”, controls were all other presentations (i.e. “PCR-  
30  
31 177 negative”, “Untested” or “Pre-COVID-19”). To achieve predictive accuracy, limit overfitting  
32  
33 178 and perform feature selection, penalized logistic regression with an adaptive lasso penalty was  
34  
35 179 chosen [10,11]. To minimize missing data, all non-numeric results at the extremes of the  
36  
37 180 measuring range, were converted to numeric results by removing the “<” and “>” signs. For  
38  
39 181 eGFR (CKD-epi) and CRP the raw precursor value was used instead of >90 ml/min/m<sup>2</sup> and  
40  
41 182 <6 mg/L, respectively. Considering that laboratory results of bilirubin, ASAT, ALAT, LD,  
42  
43 183 CK, ALP and gGT can have heavy (right) tailed distributions, which in turn impacts model  
44  
45 184 predictions, these variables were transformed logarithmically. More details regarding model  
46  
47 185 fitting can be found in the document, **Supplemental Material 1**. Models were fitted using the  
48  
49 186 glmnet-package [12].  
50  
51  
52  
53  
54  
55  
56  
57  
58  
59  
60

### 188 *CoLab-score*

189 Since this is a retrospective case-control study, the sample prevalence may not reflect the  
190 true/current COVID-19 prevalence. To obtain well-calibrated probabilities the intercept term  
191 in the model should be adjusted according to the current prevalence (details can be found in  
192 the document, **Supplemental Material 1**) [13]. However, adjusting the intercept term is not  
193 straightforward to implement in clinical practice, therefore the linear predictor of the model  
194 was categorized into a score, this score is hereafter referred to as the “CoLab-score”. The  
195 categorization is based on a number needed to test of 15 (i.e. one is willing to PCR test 15  
196 patients to find one positive) and prevalence cut-points of 1%, 2%, 5%, 10% and 40% using  
197 the intercept adjustment formula by King [13]. The intervals obtained through these breaks  
198 correspond to CoLab-scores 5 to 0, respectively. Score 0 reflects low-risk for COVID-19 and  
199 score 5 reflects high-risk. More details regarding the rationale of the CoLab-score  
200 categorization can be found in the document, **Supplemental Material 1**.

201

### 202 *Internal validation*

203 To assess model performance while taking overfitting into account, bootstrapping was  
204 performed. 1000 bootstrap samples were generated from the original data. On each bootstrap  
205 sample, the full model fitting procedure and CoLab-score conversion were performed.  
206 Optimism adjusted performance measures of the CoLab-score were obtained by applying the  
207 0.632 bootstrap rule to the in-sample and out-of-bag-sample performance [14]. Performance  
208 measures included, AUC, sensitivity, specificity, positive predictive value (PPV) and negative  
209 predictive value (NPV) of each CoLab-score. The pROC-package was used to calculate  
210 performance measures [15]. Although the full inclusion period from July 2019 to July 2020  
211 was used for model fitting, the performance was evaluated on the period starting from the first

1  
2  
3 212 COVID-19 infection (24<sup>th</sup> of February 2020) to July 2020. This was done to obtain  
4  
5 213 performance measures that would reflect real world performance.  
6  
7

8 214

9  
10  
11 215 *Temporal validation*  
12

13 216 For temporal validation, results from our center were prospectively analyzed from July 2020  
14  
15 217 to October 2021. During this period, the Netherlands was struck by a second wave of COVID-  
16  
17 218 19 infections, starting in the fall of 2020 and subsiding in the summer of 2021. In this period  
18  
19 219 there was also more widespread external PCR testing by municipal health services. The  
20  
21 220 results of external conducted PCR tests were not available to our study. To overcome this  
22  
23 221 limitation, the outcome in the temporal validation cohort was chosen as a composite of the  
24  
25 222 hospital registration of a confirmed COVID-19 infection and/or at least one positive PCR test  
26  
27 223 result. This period also covers both the emergence of new SARS-CoV-2 variants as well as  
28  
29 224 vaccine rollout. However, neither vaccination status nor genomic sequencing was available to  
30  
31 225 determine whether a patient was vaccinated or which variant caused the infection. Therefore,  
32  
33 226 data from the Dutch national institute of public health (RIVM) was used, to divide the  
34  
35 227 temporal validation period into three phases: i) from July 2020 until March 2021, no  
36  
37 228 vaccination and no variants of concern identified ii) from March 2021 until June 2021, partial  
38  
39 229 vaccination and B.1.1.7 (Alpha) variant identified as dominant iii) from June 2021 until  
40  
41 230 October 2021, widespread vaccination and B.1.617.2 (Delta) variant identified as dominant.  
42  
43 231 See **Supplemental Material 2 Figure 1** for more details. The temporal validation consisted  
44  
45 232 of assessing the AUC, sensitivity, specificity, PPV and NPV of each CoLab-score threshold  
46  
47 233 for the entire period, as well as for each phase separately to determine a possible effect of  
48  
49 234 vaccination and new variants on performance (results in the **Supplemental Material 2**).  
50  
51 235 Model calibration was assessed graphically using the rms-package [16].  
52  
53  
54  
55  
56  
57  
58  
59  
60 236

1  
2  
3 237 *External validation*  
4

5 238 For the external validation, several centers in the Netherlands were approached and assessed  
6  
7 239 if the required panel of laboratory tests and SARS-CoV-2 PCR test results were available.  
8  
9  
10 240 Seven centers responded and three centers fulfilled the inclusion criteria: Gelre Hospitals  
11  
12 241 (center 1), Atalmedial Diagnostic Centers, location Alrijne Hospital Leiderdorp (center 2) and  
13  
14 242 Zuyderland Medical Center (center 3). The hematological parameters were measured with  
15  
16 243 Sysmex XN10/XN20 (center 1), CELL-DYN-Sapphire (Abbott Laboratories) (center 2) and  
17  
18 244 Sysmex XN10 instruments (center 3). The clinical chemistry parameters were measured with  
19  
20 245 Architect c14100/c160000 (Abbott Laboratories) (center 1), Architect ci4100 (Abbott  
21  
22 246 Laboratories) (center 2) and Cobas 8000 instruments (Roche Dx) (center 3). The external  
23  
24 247 validation was similar to the temporal validation and consisted of assessing the AUC  
25  
26 248 sensitivity, specificity, PPV and NPV of each CoLab-score threshold. Calibration was  
27  
28 249 assessed graphically analogous to the temporal validation dataset.  
29  
30  
31  
32  
33  
34  
35  
36  
37  
38  
39  
40  
41  
42  
43  
44  
45  
46  
47  
48  
49  
50  
51  
52  
53  
54  
55  
56  
57  
58  
59  
60

## 250 Results

### 251 Development dataset

252 12879 emergency department (ED) presentations of 10327 patients from July 2019 to July  
 253 2020 were included. After excluding cases with an incomplete lab panel, patient presentations  
 254 that occurred after a positive PCR test in the past (re-presentations) and presentations with  
 255 extreme values (>10 times standard deviation) in any of the lab results, 10417 presentations of  
 256 8610 patients remained (**Figure 1 A**).

|                      | <b>Pre-COVID<br/>N = 5890</b> | <b>Asymptomatic<br/>N = 3303</b> | <b>PCR negative<br/>N = 945</b> | <b>PCR positive<br/>N = 279</b> |
|----------------------|-------------------------------|----------------------------------|---------------------------------|---------------------------------|
| Age in years         | 61 (21)                       | 60 (21)                          | 66 (18)                         | 69 (15)                         |
| Female gender        | 2909 (49.4 %)                 | 1659 (50.2 %)                    | 466 (49.3 %)                    | 95 (34.1 %)                     |
| Specialism           |                               |                                  |                                 |                                 |
| Internal medicine    | 1648 (28.0 %)                 | 896 (27.1 %)                     | 244 (25.8 %)                    | 71 (25.4 %)                     |
| Surgery              | 1007 (17.1 %)                 | 679 (20.6 %)                     | 51 (5.4 %)                      | 5 (1.8 %)                       |
| Neurology            | 775 (13.2 %)                  | 468 (14.2 %)                     | 64 (6.8 %)                      | 5 (1.8 %)                       |
| Pulmonary medicine   | 714 (12.1 %)                  | 220 (6.7 %)                      | 326 (34.5 %)                    | 167 (59.9 %)                    |
| Cardiology           | 560 (9.5 %)                   | 322 (9.7 %)                      | 145 (15.3 %)                    | 6 (2.2 %)                       |
| Urology              | 309 (5.2 %)                   | 148 (4.5 %)                      | 15 (1.6 %)                      | 7 (2.5 %)                       |
| Gastroenterology     | 306 (5.2 %)                   | 224 (6.8 %)                      | 27 (2.9 %)                      | 1 (0.4 %)                       |
| Geriatrics           | 189 (3.2 %)                   | 95 (2.9 %)                       | 52 (5.5 %)                      | 15 (5.4 %)                      |
| Orthopedics          | 147 (2.5 %)                   | 109 (3.3 %)                      | 11 (1.2 %)                      | 0 (0.0 %)                       |
| Gynecology           | 118 (2.0 %)                   | 82 (2.5 %)                       | 2 (0.2 %)                       | 0 (0.0 %)                       |
| Other                | 117 (2.0 %)                   | 60 (1.8 %)                       | 8 (0.8 %)                       | 2 (0.7 %)                       |
| Hemoglobin in mmol/L | 8.2 (1.3)                     | 8.3 (1.3)                        | 8.2 (1.4)                       | 8.6 (1.1)                       |
| Hematocrit in L/L    | 0.403 (0.059)                 | 0.405 (0.056)                    | 0.405 (0.062)                   | 0.417 (0.047)                   |
| Erythrocytes in /pL  | 4.41 (0.69)                   | 4.43 (0.66)                      | 4.41 (0.72)                     | 4.61 (0.60)                     |
| MCV in fl            | 91.8 (6.4)                    | 91.9 (6.1)                       | 92.4 (6.7)                      | 90.7 (5.5)                      |
| MCH in mmol          | 1.859 (0.157)                 | 1.876 (0.150)                    | 1.874 (0.172)                   | 1.869 (0.141)                   |
| MCHC in mmol/L       | 20.2 (0.9)                    | 20.4 (0.9)                       | 20.3 (1.0)                      | 20.6 (0.8)                      |
| Thrombocytes in /nL  | 263 (99)                      | 266 (100)                        | 269 (105)                       | 217 (123)                       |
| Leukocytes in /nL    | 9.30 [7.06, 12.16]            | 8.92 [7.01, 11.89]               | 9.66 [7.17, 12.94]              | 6.33 [4.74, 8.48]               |
| Neutrophils in /nL   | 6.62 [4.51, 9.53]             | 6.10 [4.42, 8.94]                | 7.01 [4.79, 10.02]              | 4.71 [3.30, 6.94]               |
| Eosinophils in /nL   | 0.09 [0.03, 0.17]             | 0.09 [0.03, 0.18]                | 0.08 [0.02, 0.17]               | 0.00 [0.00, 0.02]               |
| Basophils in /nL     | 0.04 [0.02, 0.05]             | 0.04 [0.02, 0.05]                | 0.04 [0.02, 0.05]               | 0.01 [0.01, 0.02]               |
| Lymphocytes in /nL   | 1.47 [0.93, 2.13]             | 1.56 [1.05, 2.18]                | 1.31 [0.80, 2.03]               | 0.86 [0.59, 1.21]               |
| Monocytes in /nL     | 0.70 [0.52, 0.93]             | 0.69 [0.52, 0.91]                | 0.74 [0.54, 1.01]               | 0.45 [0.32, 0.64]               |
| Glucose in mmol/L    | 6.76 [5.83, 8.39]             | 6.68 [5.76, 8.14]                | 6.98 [5.95, 8.85]               | 6.77 [5.98, 8.48]               |
| Bilirubin in umol/L  | 7.5 [5.0, 11.6]               | 7.4 [5.1, 10.9]                  | 8.3 [5.6, 12.4]                 | 8.2 [6.3, 11.4]                 |
| ASAT in U/L          | 24.0 [19.1, 32.2]             | 26.5 [21.6, 35.1]                | 27.7 [21.7, 39.2]               | 40.7 [30.2, 57.2]               |
| ALAT in U/L          | 24.3 [17.8, 35.3]             | 25.3 [18.4, 36.2]                | 25.7 [18.4, 40.0]               | 33.7 [23.3, 50.0]               |
| LD in U/L            | 201 [173, 240]                | 198 [170, 236]                   | 215 [178, 263]                  | 300 [238, 403]                  |
| CK in U/L            | 82 [51, 134]                  | 83 [52, 136]                     | 76 [51, 125]                    | 124 [62, 222]                   |
| ALP in IU/L          | 83.0 [68.0, 105.0]            | 81.0 [65.8, 102.5]               | 86.9 [67.9, 110.0]              | 71.0 [58.8, 85.0]               |
| gGT in U/L           | 27.0 [17.0, 53.0]             | 28.4 [18.4, 50.5]                | 37.0 [22.4, 68.9]               | 42.0 [28.0, 83.5]               |
| BUN in mmol/L        | 5.7 [4.3, 8.0]                | 5.8 [4.3, 7.8]                   | 6.2 [4.6, 9.4]                  | 6.1 [4.7, 8.9]                  |



|                                  |                   |                    |                   |                   |
|----------------------------------|-------------------|--------------------|-------------------|-------------------|
| CKD-epi in ml/min/m <sup>2</sup> | 80.9 [58.0, 99.1] | 85.0 [63.5, 103.3] | 79.1 [52.1, 96.6] | 76.6 [54.9, 91.2] |
| Creatinine in umol/L             | 79 [64, 100]      | 74 [61, 94]        | 78 [62, 105]      | 82 [68, 104]      |
| Potassium in mmol/L              | 4.06 (0.50)       | 4.03 (0.49)        | 4.07 (0.55)       | 3.91 (0.47)       |
| Sodium in mmol/L                 | 139.2 (4.0)       | 138.5 (3.9)        | 138.0 (4.3)       | 136.4 (4.1)       |
| Chloride in mmol/L               | 104.4 (4.6)       | 103.8 (4.5)        | 102.9 (4.8)       | 101.6 (4.4)       |
| Albumin in g/L                   | 42.4 (4.9)        | 42.3 (4.5)         | 40.8 (4.8)        | 38.4 (3.8)        |
| CRP in mg/L                      | 8 [2, 41]         | 5 [1, 30]          | 18 [3, 69]        | 77 [37, 136]      |

257

258 **Table 1: Descriptive statistics of development dataset and laboratory concentrations.**

259 *Shown are the laboratory tests routinely requested at ED presentation and their mean/median*  
 260 *results (in the development dataset) for the presentations before the first COVID-19 patient in*  
 261 *the Netherlands (“Pre-COVID-19”), presentations thereafter that were not tested for*  
 262 *COVID-19 (“Untested”), tested negatively (“PCR negative”) and tested positive (“PCR*  
 263 *positive”). For results with normal distributions, the mean value and standard deviation (in*  
 264 *round brackets) are shown. For results that have skewed or heavy tailed distributions, the*  
 265 *median value and the interquartile range is shown [in squared brackets]. Dark grey marked*  
 266 *figures indicate a clinically relevant difference from the Pre-COVID-19 category (based on*  
 267 *the total allowable error).*

268

269 Descriptive statistics of ED presentations are shown in **Table 1**, dark grey marked figures  
 270 indicate a clinically relevant difference from the Pre-COVID-19 category (based on the total  
 271 allowable error [17]). For the PCR positives (N = 279), 91% (95% CI: 88 to 94%) of the cases  
 272 were tested positive in their first PCR. The remaining 24 patients were positive in their second  
 273 (N = 18), third (N = 5) or fourth (N = 1) PCR.

274

275 **CoLab-score**

276 The model obtained through adaptive lasso regression contained eleven variables, which are  
 277 depicted with their regression coefficients (weights) in **Table 2**.

| Variable                                      | $\beta$  | Exclusion limit            | Relative importance |
|-----------------------------------------------|----------|----------------------------|---------------------|
| Intercept                                     | -6.885   |                            | -                   |
| Erythrocytes /pL                              | 0.9379   | Erythrocytes < 2.9 /pL     | 52 %                |
| Leukocytes /nL                                | -0.1298  |                            | 46 %                |
| Eosinophils /nL                               | -6.834   |                            | 86 %                |
| Basophils /nL                                 | -47.70   | Basophils >0.33 /nL        | 100 %               |
| log <sub>10</sub> of Bilirubin in $\mu$ mol/L | -1.142   | Bilirubin >169 $\mu$ mol/L | 26 %                |
| log <sub>10</sub> of LD in U/L                | 5.369    | LD >1564 U/L               | 58 %                |
| log <sub>10</sub> of ALP in IU/L              | -3.114   | AF >1000 IU/L              | 45 %                |
| log <sub>10</sub> of gGT in U/L               | 0.3605   | gGT >1611 U/L              | 11 %                |
| Albumin in g/L                                | -0.1156  |                            | 45 %                |
| CRP in mg/L                                   | 0.002560 |                            | 15 %                |
| Age in years                                  | 0.002275 |                            | 4 %                 |

278

### 279 **Table 2: Calculation of the CoLab-linear predictor (LP).**

280 *The CoLab-linear predictor (LP) is calculated by summing the intercept and the products of*  
 281 *the 11 variables with their corresponding coefficients ( $\beta$ 's). CoLab-LP = - 6.885 +*  
 282 *[erythrocytes]  $\times$  0.9379 - [leukocytes]  $\times$  0.1298 - [eosinophils]  $\times$  6.834 - [basophils]  $\times$*   
 283 *47.7 - log<sub>10</sub>([bilirubin])  $\times$  1.142 + log<sub>10</sub>([LD])  $\times$  5.369 - log<sub>10</sub>([ALP])  $\times$  3.114 +*  
 284 *log<sub>10</sub>([gGT])  $\times$  0.3605 - [albumin]  $\times$  0.1156 + [CRP]  $\times$  0.02560 + [age]  $\times$  0.002275. The*  
 285 *LP can be converted into a CoLab-score (see Figure 2) or into a probability if the prevalence*  
 286 *is known or estimated (see details in Supplemental Material 1). The CoLab-score is not valid*  
 287 *if any of the variables exceed the limits in the third column.*

288

289 A larger  $\beta$ -coefficient does not imply that a variable is more important in predicting the odds  
 290 of testing positive for SARS-CoV-2, since variables are on different scales. Therefore, the  
 291 relative importance is calculated based on scaled coefficients. The absolute basophil count has  
 292 the highest relative importance, followed by eosinophil count.

293 As shown in **Figure 2**, the linear predictor clearly discriminates between COVID-19 and non-  
 294 COVID-19. The linear predictor is converted to CoLab-scores 0 – 5 with the cut-points  
 295 depicted in **Figure 2**.

296

297 *Internal validation*

298 The model was validated in the period starting from the first COVID-19 infection to July

299 2020, in this period the mean prevalence was 7.2%. The AUC of the CoLab-score is 0.930

300 (95% CI: 0.909 to 0.945).

| CoLab-score | Sensitivity           | Specificity           | PPV                    | NPV                   | % of population    |
|-------------|-----------------------|-----------------------|------------------------|-----------------------|--------------------|
| 0           | 0.984 (0.970 - 0.991) | 0.411 (0.285 - 0.520) | 0.115 (0.0932 - 0.141) | 0.997 (0.994 - 0.999) | 38.4 (26.4 - 48.4) |
| ≤ 1         | 0.909 (0.886 - 0.943) | 0.793 (0.744 - 0.826) | 0.255 (0.207 - 0.299)  | 0.991 (0.989 - 0.995) | 74.4 (69.4 - 77.4) |
| ≤ 2         | 0.859 (0.811 - 0.889) | 0.887 (0.866 - 0.901) | 0.371 (0.317 - 0.414)  | 0.988 (0.983 - 0.991) | 83.2 (82.2 - 85.2) |
| ≤ 3         | 0.750 (0.700 - 0.810) | 0.953 (0.944 - 0.959) | 0.551 (0.494 - 0.601)  | 0.980 (0.975 - 0.985) | 90.1 (89.1 - 91.1) |
| ≤ 4         | 0.608 (0.522 - 0.685) | 0.978 (0.973 - 0.983) | 0.682 (0.622 - 0.740)  | 0.970 (0.962 - 0.977) | 93.8 (92.8 - 93.8) |

301

302 **Table 3: Diagnostic performance CoLab-score in the development dataset.**303 *The development dataset was internally validation for the period March 2020 – July 2020 (N*304 *= 4.527). Sensitivities, specificities, positive predictive values (PPV), negative predictive*305 *values (NPV) and fraction of patients (%) are shown for fixed cut-offs (CoLab-score 0 till ≤*306 *4). The numbers in round brackets represent the 95% bootstrapped confidence intervals. The*307 *first column defines the threshold above which CoLab-score a patient is considered positive.*308 *Note that “0” lists the sensitivity and NPV of CoLab-score 0 and “≤ 4” lists the specificity*309 *and PPV of CoLab-score 5.*

310

311 Diagnostic performance is shown in **Table 3**. A CoLab-score of 0 has a negative predictive

312 value (NPV) of 0.997 (95% CI: 0.994 to 0.999) and positive predictive value (PPV) of 0.115

313 (0.0932 - 0.141), one third (38.4%, 95% CI: 26.4 to 48.4%) of all ED presentations were

314 assigned this score and can therefore be safely excluded. Conversely, 6.2% (95% CI: 6.3 to

315 7.2%) of the ED patients had a CoLab-score = 5. Given the PPV of this score (0.682, 95% CI:

316 0.622 to 0.740, NPV: 0.970, 95% CI: 0.962 - 0.977), subsequent PCR testing is advised.

1  
2  
3 317  
4  
56 318 *Temporal validation*  
7

8 319 As the CoLab-score was developed in our center after the first COVID-19-wave in the  
9  
10 320 Netherlands, the performance was evaluated in our center from July 2020 until October 2021.  
11  
12 321 Lab results from 17489 ED presentations were collected. After applying the inclusion flow as  
13  
14 322 shown in **Figure 1 B**, 14080 presentations remained, of which 1039 were associated with a  
15  
16 323 COVID-19 infection.  
17

18  
19  
20 324 The mean prevalence in this period was 7.4%. The AUC of the CoLab-score in the temporal  
21  
22 325 validation set is 0.916 (95% CI: 0.906 to 0.927). The performance is comparable to the  
23  
24 326 development cohort, although sensitivity is slightly lower and specificity slightly higher, 95%  
25  
26 327 CIs overlap (cf. **Table 3** and **Table 4**). The temporal validation dataset was also split into  
27  
28 328 three phases according to dominant SARS-CoV-2 variants and vaccine roll-out (see  
29  
30 329 **Supplemental Material 2 Figure 1**). The discriminative ability is not affected by phases with  
31  
32 330 different dominant variants and/or vaccination status. Diagnostic performance is also  
33  
34 331 preserved in terms of sensitivity and specificity, PPV and NPV are difficult to compare due to  
35  
36 332 different prevalence/pre-test probabilities in each phase (see **Supplemental Material 2 Table**  
37  
38 333 **1**).  
39  
40  
41  
42  
43

44 334 In terms of the predicted probabilities, model calibration shows that overall predicted  
45  
46 335 probabilities are too low (see **Supplemental Material 3** for the calibration plot), which is  
47  
48 336 expected since the prevalence differs and the intercept has to be adjusted to the prevalence.  
49  
50 337 In this period at least 22 COVID-19 positive patients were identified by the CoLab-score, that  
51  
52 338 initially did not present with COVID-specific symptoms. Most patients had neurological or  
53  
54 339 orthopedic presenting symptoms.  
55  
56  
57  
58  
59  
60

340

341 *External validation*

342 For external validation, data obtained from three other centers were used, center 1 (N = 1284,  
 343 52 COVID-19 positive), center 2 (N = 2899, 99 COVID-19 positive) and center 3 (N = 3545,  
 344 336 COVID-19 positive). The inclusion flow is summarized in **Figure 3**. COVID-19  
 345 prevalence differed between the three centers (4.0%, 3.4% and 9.5% respectively) and was  
 346 lower in centers 1 and 2, and higher in center 3 than in the development dataset. The AUCs of  
 347 the CoLab-score are 0.904 (95% CI: 0.866 to 0.942), 0.886 (95% CI: 0.851 - 0.922) and 0.891  
 348 (95% CI: 0.872 - 0.909), for centers 1, 2, and 3 respectively.

349 Diagnostic performance is shown in **Table 4**. The sensitivity of CoLab-score 0 in all centers  
 350 is  $\geq 0.96$ . Therefore, the NPV of CoLab-score 0 was more than 99%. Calibration plots for  
 351 external centers are shown in **Supplemental Material 3**, the observed fraction of COVID-19  
 352 positives is slightly lower than expected in centers 1 and 2. For center 3, low probabilities  
 353 appear slightly underestimated and high probabilities slightly overestimated.

| CoLab<br>-score | Validation<br>set | Sensitivity           | Specificity           | PPV                   | NPV                   |
|-----------------|-------------------|-----------------------|-----------------------|-----------------------|-----------------------|
| 0               | Temporal          | 0.967 (0.957 - 0.977) | 0.420 (0.411 - 0.428) | 0.117 (0.115 - 0.119) | 0.994 (0.992 - 0.996) |
|                 | Center 1          | 1.000 (1.000 - 1.000) | 0.333 (0.308 - 0.360) | 0.059 (0.057 - 0.062) | 1.000 (1.000 - 1.000) |
|                 | Center 2          | 0.960 (0.919 - 0.990) | 0.351 (0.334 - 0.369) | 0.050 (0.047 - 0.052) | 0.996 (0.992 - 0.999) |
|                 | Center 3          | 0.973 (0.955 - 0.988) | 0.322 (0.307 - 0.338) | 0.131 (0.127 - 0.134) | 0.991 (0.986 - 0.996) |
| $\leq 1$        | Temporal          | 0.888 (0.869 - 0.907) | 0.790 (0.783 - 0.798) | 0.252 (0.245 - 0.260) | 0.989 (0.987 - 0.991) |
|                 | Center 1          | 0.923 (0.846 - 0.981) | 0.695 (0.670 - 0.722) | 0.113 (0.102 - 0.126) | 0.995 (0.991 - 0.999) |
|                 | Center 2          | 0.929 (0.879 - 0.970) | 0.680 (0.663 - 0.697) | 0.093 (0.087 - 0.100) | 0.996 (0.994 - 0.998) |
|                 | Center 3          | 0.917 (0.887 - 0.946) | 0.675 (0.659 - 0.691) | 0.228 (0.218 - 0.238) | 0.987 (0.983 - 0.992) |
| $\leq 2$        | Temporal          | 0.820 (0.796 - 0.842) | 0.894 (0.889 - 0.899) | 0.381 (0.368 - 0.395) | 0.984 (0.982 - 0.986) |
|                 | Center 1          | 0.808 (0.692 - 0.904) | 0.812 (0.791 - 0.834) | 0.154 (0.131 - 0.179) | 0.990 (0.984 - 0.995) |
|                 | Center 2          | 0.869 (0.798 - 0.929) | 0.802 (0.787 - 0.816) | 0.135 (0.122 - 0.147) | 0.994 (0.991 - 0.997) |
|                 | Center 3          | 0.893 (0.860 - 0.926) | 0.795 (0.781 - 0.809) | 0.314 (0.297 - 0.330) | 0.986 (0.982 - 0.990) |
| $\leq 3$        | Temporal          | 0.710 (0.682 - 0.738) | 0.962 (0.958 - 0.965) | 0.595 (0.573 - 0.618) | 0.977 (0.974 - 0.979) |
|                 | Center 1          | 0.750 (0.635 - 0.865) | 0.910 (0.893 - 0.926) | 0.260 (0.216 - 0.309) | 0.989 (0.983 - 0.994) |
|                 | Center 2          | 0.687 (0.596 - 0.778) | 0.899 (0.887 - 0.910) | 0.194 (0.168 - 0.222) | 0.988 (0.984 - 0.991) |
|                 | Center 3          | 0.768 (0.726 - 0.812) | 0.887 (0.876 - 0.898) | 0.417 (0.392 - 0.445) | 0.973 (0.969 - 0.978) |
| $\leq 4$        | Temporal          | 0.585 (0.555 - 0.616) | 0.984 (0.982 - 0.987) | 0.749 (0.724 - 0.777) | 0.968 (0.965 - 0.970) |
|                 | Center 1          | 0.654 (0.519 - 0.769) | 0.952 (0.939 - 0.964) | 0.366 (0.296 - 0.447) | 0.985 (0.979 - 0.990) |
|                 | Center 2          | 0.556 (0.455 - 0.647) | 0.953 (0.945 - 0.961) | 0.295 (0.246 - 0.349) | 0.984 (0.980 - 0.987) |
|                 | Center 3          | 0.667 (0.619 - 0.720) | 0.931 (0.922 - 0.940) | 0.502 (0.467 - 0.541) | 0.964 (0.959 - 0.969) |

354

1  
2  
3 355 **Table 4: Diagnostic performance of the CoLab-score in the validation dataset (temporal)**  
4  
5 356 **and three external hospitals.**  
6  
7 357 *Sensitivities, specificities, positive predictive values (PPV) and negative predictive values*  
8 358 *(NPV) are shown for fixed cut-offs (CoLab-score 0 till  $\leq 4$ ) with bootstrapped 95% confidence*  
9  
10 359 *intervals in parentheses. Note that “0” lists the sensitivity and NPV of CoLab-score 0 and “ $\leq$*   
11  
12 360 *4” lists the specificity and PPV of CoLab-score 5.*  
13  
14  
15  
16  
17  
18  
19  
20  
21  
22  
23  
24  
25  
26  
27  
28  
29  
30  
31  
32  
33  
34  
35  
36  
37  
38  
39  
40  
41  
42  
43  
44  
45  
46  
47  
48  
49  
50  
51  
52  
53  
54  
55  
56  
57  
58  
59  
60

For peer review only

## 361 Discussion

362 Given the impact of COVID-19 on society and healthcare, there is a need for simple and fast  
363 detection of patients with a possible COVID-19 infection in the ED. The CoLab-score  
364 described in this study, is a fast and accurate risk score to triage patients presenting at the ED  
365 based on ten routine blood biomarkers and age.

366 The main strength of this study is that this score can be used as an early-warning or triaging  
367 tool for the entire ED population, regardless of presenting symptoms. This is in contrast to the  
368 vast majority of COVID-19 diagnostic models that have been developed on a pre-selected  
369 population of PCR-tested patients [18–25]. Moreover, the CoLab-score requires only routine  
370 blood tests instead of (features from) imaging such as CT-scans or laboratory tests that are not  
371 routinely collected in the ED , e.g. interleukin-6 or 3-hydroxybuteric acid [4]. Compared to  
372 lateral flow tests (LFTs), which provide a dichotomous result within 30 minutes and are  
373 widely adopted in EDs, the CoLab-score is a continuous score. The lowest CoLab-scores (0 -  
374 1) offer higher sensitivity and are therefore more suitable to rule-out COVID-19 than a LFT,  
375 which are only moderately sensitive (albeit more specific) [26,27].

376 Two other studies have been published which are similar to this study [20,28]. Interestingly,  
377 the study by Soltan et al., ranked basophils and eosinophils as the two most important features  
378 in predicting the outcome, similar to our results [28]. Eosinophils were also seen as one of the  
379 most important features by Plante et al. [20]. However, both studies focus on an artificial  
380 intelligence/machine learning approach. While their approach likely results in higher  
381 predictive performance due to the ability of machine learning models to capture non-linear  
382 and interaction effects, the goal of this study was to develop a simple, fast and robust model  
383 that can easily be implemented in current hospital IT systems.

1  
2  
3 384 Since this is a retrospective case-control study, there is some unavoidable missing data. In our  
4  
5 385 cohort 17.6% of the ED presentations could not be used due to one or more missing  
6  
7 386 laboratory results. This is lower or equal to similar studies; 22% [22], 17% [19] and 11% [25].  
8  
9  
10 387 We do not expect that presentations with missing data have led to severe inclusion bias,  
11  
12 388 important to note is that 7.7% of missingness is due to analytical errors which should not  
13  
14 389 cause bias. For the remaining 9.9% of missingness, the full lab panel was most frequently  
15  
16 390 missing for pediatric, obstetric and surgery patients which are rarely COVID-19 patients. This  
17  
18 391 is also the case for external validation centers 1 and 2, in these centers only internal medicine  
19  
20 392 ED presentations were tested with a laboratory panel containing the 10 tests required for the  
21  
22 393 CoLab-score. The ED lab panel of other disciplines (e.g. urology, surgery or pediatrics)  
23  
24 394 differed and did not contain the required tests. Nevertheless, the majority of COVID-19  
25  
26 395 patients were internal medicine ED presentations, which is reflected by the few PCR-positive  
27  
28 396 patients excluded.

29  
30  
31  
32  
33 397 The performance of the CoLab-score is affected by the time between the onset of symptoms  
34  
35 398 and ED presentations. The score increases with the duration of symptoms and gradually  
36  
37 399 decreases after day 7 (see **Supplemental Material 4 Figure 1** for a plot of the duration of  
38  
39 400 COVID-19 related symptoms and the CoLab-linear predictor). As a consequence, some  
40  
41 401 COVID-19 patients with early or late presentation after onset of symptoms can be missed.  
42  
43 402 Optimal performance of the CoLab-score is achieved when the onset of symptoms is >1 and  
44  
45 403 <10 days prior to ED presentation.

46  
47  
48  
49  
50 404 It was chosen to exclude re-presentations. Since the median time between initial presentation  
51  
52 405 and re-presentation was 12 days, these patients were most likely not re-infected patients, but  
53  
54 406 patients who deteriorated after initial presentation/treatment. Given that the CoLab-score  
55  
56 407 follows the host-immune response, the score is time sensitive (see **Supplemental Material 4**  
57  
58 408 **Figure 1**). Including these patients would impact the performance of the CoLab-score as



1  
2  
3 409 patients in a later phase of the disease show different biomarker profiles. The CoLab-score is  
4  
5 410 aimed towards alerting clinicians to patients presenting with a novel SARS-CoV-2 infection,  
6  
7 411 rather than patients who deteriorate after treatment for COVID-19.  
8  
9

10 412 Finally, the CoLab-score could lead to false positives by other viral infections. However, in an  
11  
12 413 historic patient cohort, the CoLab-score had only limited discriminative ability in separating  
13  
14 414 influenza-PCR-negative from influenza-PCR-positive patients (see **Supplemental Material 4**  
15  
16 415 **Figure 2**) implying specificity for SARS-CoV-2. Since the CoLab-score reflects the host-  
17  
18 416 response to the virus, it is expected that the CoLab-score is also sensitive to future SARS-  
19  
20 417 CoV-2 variants. This is supported by the fact that the diagnostic performance is sustained in  
21  
22 418 periods with different dominant variants. Moreover, there is no evidence that the diagnostic  
23  
24 419 performance is affected by vaccinations. Although vaccination status is not registered for all  
25  
26 420 presenting patients, there is no evidence that performance is reduced under increasing degrees  
27  
28 421 of vaccination. In a small subgroup of 12 patients for whom vaccination status was registered,  
29  
30 422 and were COVID-19 positive, 8 of 12 patients had the highest CoLab-score (= 5) (see  
31  
32 423 **Supplemental Material 2 Figure 2**),  
33  
34  
35  
36  
37  
38

39 424 To conclude, the CoLab-score developed and validated in this study, based on 10 routine  
40  
41 425 laboratory results and age, is available within 1 hour for any patient presenting at the ED. The  
42  
43 426 score can be used by clinicians to guide PCR testing or triage patients and helps to identify  
44  
45 427 COVID-19 in asymptomatic patients. The lowest CoLab-score can be used to effectively rule-  
46  
47 428 out a possible SARS-CoV-2 infection, the highest score to alert physicians to a possible  
48  
49 429 infection. Thus, the CoLab-score is a valuable tool to rule out COVID-19, guide PCR testing  
50  
51 430 and is available to any center with access to routine laboratory tests.  
52  
53  
54  
55

56 431  
57  
58  
59  
60

## 432 **Funding statement**

433 This was an investigator-initiated study and no funding was received for this study.

434

## 435 **Competing interests**

436 A-KB reports no conflict of interest. RD reports no conflict of interest. MM reports no  
437 conflict of interest. HA reports no conflict of interest. RvB reports no conflict of interest. WT  
438 reports no conflict of interest. SB reports not conflict of interest. ML reports no conflict of  
439 interest. RM reports no conflict of interest. MB reports no conflict of interest. JK reports no  
440 conflict of interest. MM reports no conflict of interest. JvS reports no conflict of interest. NvR  
441 reports no conflict of interest. VS reports no conflict of interest.

442

## 443 **Data sharing statement**

444 Datasets with source data for Table 1, Figure 2, Table 3 and Table 4, as well the R-code to fit  
445 the model is available from the Dryad repository, DOI:[WILL BE PROVIDED WHEN  
446 UNDER REVIEW]. Technical appendix can be found in **Supplemental Material 1**.

447

## 448 **Author contributorship statement**

449 Arjen-Kars Boer: Conceptualization (Lead), Data curation (Lead), Funding acquisition (Lead),  
450 Investigation (Equal), Methodology (Equal), Supervision (Equal), Writing-original draft  
451 (Equal), Writing-review & editing (Equal).

452 Ruben Deneer: Data curation (Equal), Formal analysis (Equal), Investigation (Equal),  
453 Methodology (Lead), Software (Lead), Visualization (Lead), Writing-original draft (Equal),  
454 Writing-review & editing (Equal).

- 1  
2  
3 455 Maaïke Maas: Conceptualization (Supporting), Resources (Supporting), Supervision  
4  
5 456 (Supporting), Validation (Supporting), Writing-review & editing (Equal).  
6  
7  
8 457 Heidi Ammerlaan: Conceptualization (Supporting), Resources (Supporting), Supervision  
9  
10 458 (Supporting), Validation (Equal), Writing-review & editing (Equal).  
11  
12  
13 459 Roland van Balkom: Conceptualization (Supporting), Resources (Supporting), Supervision  
14  
15 460 (Supporting), Validation (Supporting), Writing-review & editing (Equal).  
16  
17  
18 461 Wendy Thijssen: Conceptualization (Supporting), Resources (Supporting), Supervision  
19  
20 462 (Supporting), Validation (Supporting), Writing-review & editing (Equal).  
21  
22  
23 463 Sophie Bennenbroek: Conceptualization (Supporting), Resources (Supporting), Supervision  
24  
25 464 (Supporting), Validation (Supporting), Writing-review & editing (Equal).  
26  
27  
28 465 Mathie Leers: Resources (Equal), Validation (Equal), Writing-review & editing (Equal).  
29  
30  
31 466 Remy Martens: Resources (Equal), Validation (Equal), Writing-review & editing (Equal).  
32  
33  
34 467 Madelon M. Buijs: Resources (Equal), Validation (Equal), Writing-review & editing (Equal).  
35  
36  
37 468 Jos Kerremans: Resources (Equal), Validation (Equal), Writing-review & editing (Equal).  
38  
39  
40 469 Muriël Messchaert: Resources (Equal), Validation (Equal), Writing-review & editing (Equal).  
41  
42  
43 470 Jeroen van Suijlen: Resources (Supporting), Validation (Supporting), Writing-review & editing  
44  
45 471 (Equal).  
46  
47  
48 472 Natal A.W. van Riel: Methodology (Supporting), Resources (Supporting), Supervision (Equal),  
49  
50 473 Writing-review & editing (Equal).  
51  
52  
53 474 Volkher Scharnhorst: Conceptualization (Equal), Funding acquisition (Equal), Project  
54  
55 475 administration (Lead), Resources (Equal), Supervision (Lead), Writing-review & editing  
56  
57 476 (Equal).  
58  
59  
60

477 **References**

- 478 1 Coronavirus Disease (COVID-19) Situation Reports.  
479 <https://www.who.int/emergencies/diseases/novel-coronavirus-2019/situation-reports/>  
480 (accessed 4 Feb 2021).
- 481 2 Guan W, Ni Z, Hu Y, *et al.* Clinical Characteristics of Coronavirus Disease 2019 in  
482 China. <https://doi.org/10.1056/NEJMoa2002032> 2020;**382**:1708–20.  
483 doi:10.1056/NEJMOA2002032
- 484 3 Vetter P, Vu DL, L’Huillier AG, *et al.* Clinical features of covid-19. *BMJ* 2020;**369**.  
485 doi:10.1136/BMJ.M1470
- 486 4 Wynants L, Van Calster B, Collins GS, *et al.* Prediction models for diagnosis and  
487 prognosis of covid-19: Systematic review and critical appraisal. *BMJ* 2020;**369**:18.  
488 doi:10.1136/bmj.m1328
- 489 5 Albahri AS, Hamid RA, Alwan J k., *et al.* Role of biological Data Mining and Machine  
490 Learning Techniques in Detecting and Diagnosing the Novel Coronavirus (COVID-19):  
491 A Systematic Review. *J. Med. Syst.* 2020;**44**:122. doi:10.1007/s10916-020-01582-x
- 492 6 Hooli S, King C. Generalizability of Coronavirus Disease 2019 (COVID-19) Clinical  
493 Prediction Models. *Clin Infect Dis* 2020;**71**:897–897. doi:10.1093/cid/ciaa417
- 494 7 Prokop M, Everdingen W van, Vellinga T van R, *et al.* CO-RADS: A Categorical CT  
495 Assessment Scheme for Patients Suspected of Having COVID-19—Definition  
496 and Evaluation. <https://doi.org/10.1148/radiol2020201473> 2020;**296**:E97–104.  
497 doi:10.1148/RADIOL.2020201473
- 498 8 Goodacre S, Thomas B, Sutton L, *et al.* Derivation and validation of a clinical severity  
499 score for acutely ill adults with suspected COVID-19: The PRIEST observational cohort

- 1  
2  
3 500 study. *PLoS One* 2021;**16**:e0245840. doi:10.1371/JOURNAL.PONE.0245840  
4  
5  
6 501 9 R Core Team. R: A Language and Environment for Statistical Computing.  
7  
8 502 2020.<https://www.r-project.org/>  
9  
10  
11 503 10 Zou H. The adaptive lasso and its oracle properties. *J Am Stat Assoc* 2006;**101**:1418–29.  
12  
13 504 doi:10.1198/016214506000000735  
14  
15  
16 505 11 Tibshirani R. Regression Shrinkage and Selection Via the Lasso. *J R Stat Soc Ser B*  
17  
18 506 1996;**58**:267–88. doi:10.1111/j.2517-6161.1996.tb02080.x  
19  
20  
21  
22 507 12 Friedman J, Hastie T, Tibshirani R. Regularization paths for generalized linear models  
23  
24 508 via coordinate descent. *J Stat Softw* 2010;**33**:1–22. doi:10.18637/jss.v033.i01  
25  
26  
27 509 13 King G, Zeng L. Logistic Regression in Rare Events Data. *Polit Anal* 2001;**9**:137–63.  
28  
29 510 doi:10.1093/oxfordjournals.pan.a004868  
30  
31  
32 511 14 Efron B. Estimating the error rate of a prediction rule: Improvement on cross-validation.  
33  
34 512 *J Am Stat Assoc* 1983;**78**:316–31. doi:10.1080/01621459.1983.10477973  
35  
36  
37 513 15 Robin X, Turck N, Hainard A, *et al.* pROC: An open-source package for R and S+ to  
38  
39 514 analyze and compare ROC curves. *BMC Bioinformatics* 2011;**12**:77. doi:10.1186/1471-  
40  
41 515 2105-12-77  
42  
43  
44  
45 516 16 Harrell Jr FE. rms: Regression Modeling Strategies. 2021.[https://cran.r-](https://cran.r-project.org/package=rms)  
46  
47 517 [project.org/package=rms](https://cran.r-project.org/package=rms)  
48  
49  
50 518 17 Ricós C, Alvarez V, Cava F, *et al.* Current databases on biological variation: Pros, cons  
51  
52 519 and progress. *Scand. J. Clin. Lab. Invest.* 1999;**59**:491–500.  
53  
54 520 doi:10.1080/00365519950185229  
55  
56  
57  
58 521 18 Brinati D, Campagner A, Ferrari D, *et al.* Detection of COVID-19 Infection from  
59  
60

- 1  
2  
3 522 Routine Blood Exams with Machine Learning: A Feasibility Study. *J Med Syst*  
4  
5 523 2020;**44**:1–12. doi:10.1007/s10916-020-01597-4  
6  
7  
8 524 19 Joshi RP, Pejaver V, Hammarlund NE, *et al.* A predictive tool for identification of  
9  
10 525 SARS-CoV-2 PCR-negative emergency department patients using routine test results. *J*  
11  
12 526 *Clin Virol* 2020;**129**:104502. doi:10.1016/j.jcv.2020.104502  
13  
14  
15 527 20 Plante TB, Blau AM, Berg AN, *et al.* Development and external validation of a machine  
16  
17 528 learning tool to rule out COVID-19 among adults in the emergency department using  
18  
19 529 routine blood tests: A large, multicenter, real-world study. *J Med Internet Res*  
20  
21 530 2020;**22**:e24048. doi:10.2196/24048  
22  
23  
24  
25 531 21 Qin L, Yang Y, Cao Q, *et al.* A predictive model and scoring system combining clinical  
26  
27 532 and CT characteristics for the diagnosis of COVID-19. *Eur Radiol* 2020;**30**:6797–807.  
28  
29 533 doi:10.1007/s00330-020-07022-1  
30  
31  
32  
33 534 22 Kurstjens S, van der Horst A, Herpers R, *et al.* Rapid identification of SARS-CoV-2-  
34  
35 535 infected patients at the emergency department using routine testing. *Clin Chem Lab Med*  
36  
37 536 2020;**58**:1587–93. doi:10.1515/cclm-2020-0593  
38  
39  
40  
41 537 23 Fink DL, Khan PY, Goldman N, *et al.* Development and internal validation of a  
42  
43 538 diagnostic prediction model for COVID-19 at time of admission to hospital. *QJM An Int*  
44  
45 539 *J Med* Published Online First: 9 November 2020. doi:10.1093/qjmed/hcaa305  
46  
47  
48  
49 540 24 Giamello JD, Paglietta G, Cavalot G, *et al.* A simple tool to help ruling-out Covid-19 in  
50  
51 541 the emergency department: derivation and validation of the LDH-CRP-Lymphocyte  
52  
53 542 (LCL) score. *Emerg Care J* 2020;**16**. doi:10.4081/ecj.2020.9336  
54  
55  
56 543 25 Tordjman M, Mekki A, Mali RD, *et al.* Pre-test probability for SARS-Cov-2-related  
57  
58 544 infection score: The PARIS score. *PLoS One* 2020;**15**:e0243342.  
59  
60

1  
2  
3 545 doi:10.1371/journal.pone.0243342  
4  
5

6 546 26 Peto T, Affron D, Afrough B, *et al.* COVID-19: Rapid antigen detection for SARS-CoV-  
7  
8 547 2 by lateral flow assay: A national systematic evaluation of sensitivity and specificity for  
9  
10 548 mass-testing. *EClinicalMedicine* 2021;**36**:100924.  
11  
12 doi:10.1016/J.ECLINM.2021.100924  
13 549  
14

15  
16 550 27 García-Fiñana M, Hughes DM, Cheyne CP, *et al.* Performance of the Innova SARS-  
17  
18 551 CoV-2 antigen rapid lateral flow test in the Liverpool asymptomatic testing pilot:  
19  
20 552 population based cohort study. *BMJ* 2021;**374**:1637. doi:10.1136/BMJ.N1637  
21  
22

23 553 28 Soltan AAS, Kouchaki S, Zhu T, *et al.* Rapid triage for COVID-19 using routine clinical  
24  
25 554 data for patients attending hospital: development and prospective validation of an  
26  
27 555 artificial intelligence screening test. *Lancet Digit Heal* 2021;**3**:e78–87.  
28  
29 556 doi:10.1016/S2589-7500(20)30274-0  
30  
31

32  
33 557  
34  
35

36 558  
37  
38  
39  
40  
41  
42  
43  
44  
45  
46  
47  
48  
49  
50  
51  
52  
53  
54  
55  
56  
57  
58  
59  
60

1  
2  
3 559 **Figure legends**  
4

5 560  
6  
7

8 561 **Figure 1: Inclusion flow of patients in the development (A) and temporal validation (B)**  
9  
10 562 **dataset.**

11  
12  
13 563 *All patient admissions with routine venous blood sampling at the emergency department (ED)*  
14  
15 564 *were included. For the development dataset, completeness of the lab panel was assessed for*  
16  
17 565 *all the 29 laboratory tests (see Table 1), for the temporal validation dataset this was only*  
18  
19 566 *necessary for 10 laboratory tests (see Table 2). The major causes of missingness are*  
20  
21 567 *described in the text. In the development dataset, presentations with extreme values ( $>10$  SD)*  
22  
23 568 *were excluded. The same limits were applied to the temporal validation dataset (see Table 2*  
24  
25 569 *for limits).*

26  
27  
28  
29  
30 570  
31  
32

33 571 **Figure 2: Probability density plot of the CoLab-linear predictor.**

34  
35  
36 572 *The probability density plots for COVID (dark grey) and non-COVID patients (light grey) are*  
37  
38 573 *plotted against the linear predictor (see table 2). The CoLab-score cut-offs ( $-5.83$ ,  $-4.02$ ,  $-$*   
39  
40 574  *$3.29$ ,  $-2.34$  and  $-1.64$ ) are depicted with vertical dashed lines. The white-boxed numbers*  
41  
42 575 *(between the cut-offs) represent the corresponding CoLab-score. Note that while the area*  
43  
44 576 *under both curves is identical (since these are probability density functions), in absolute*  
45  
46 577 *numbers the “negative or untested”-group is about 36 times larger than the PCR positive*  
47  
48 578 *group.*

49  
50  
51  
52  
53 579  
54  
55

56 580 **Figure 3: Inclusion flow of ED patients in three external centers.**  
57  
58  
59  
60



1  
2  
3 581 *All emergency department (ED) presentations with routine venous blood sampling were*  
4  
5 582 *included. Missingness of lab panels was assessed for the 11 variables in the CoLab-score (see*  
6  
7 583 *Table 2). Re-presentations after a positive PCR result or clinical COVID-19 registration were*  
8  
9 584 *excluded as “previous COVID-19+”. Presentations with any laboratory result above the*  
10  
11 585 *limits of the CoLab-score (see Table 2) were excluded.*  
12  
13  
14  
15  
16  
17  
18  
19  
20  
21  
22  
23  
24  
25  
26  
27  
28  
29  
30  
31  
32  
33  
34  
35  
36  
37  
38  
39  
40  
41  
42  
43  
44  
45  
46  
47  
48  
49  
50  
51  
52  
53  
54  
55  
56  
57  
58  
59  
60

For peer review only

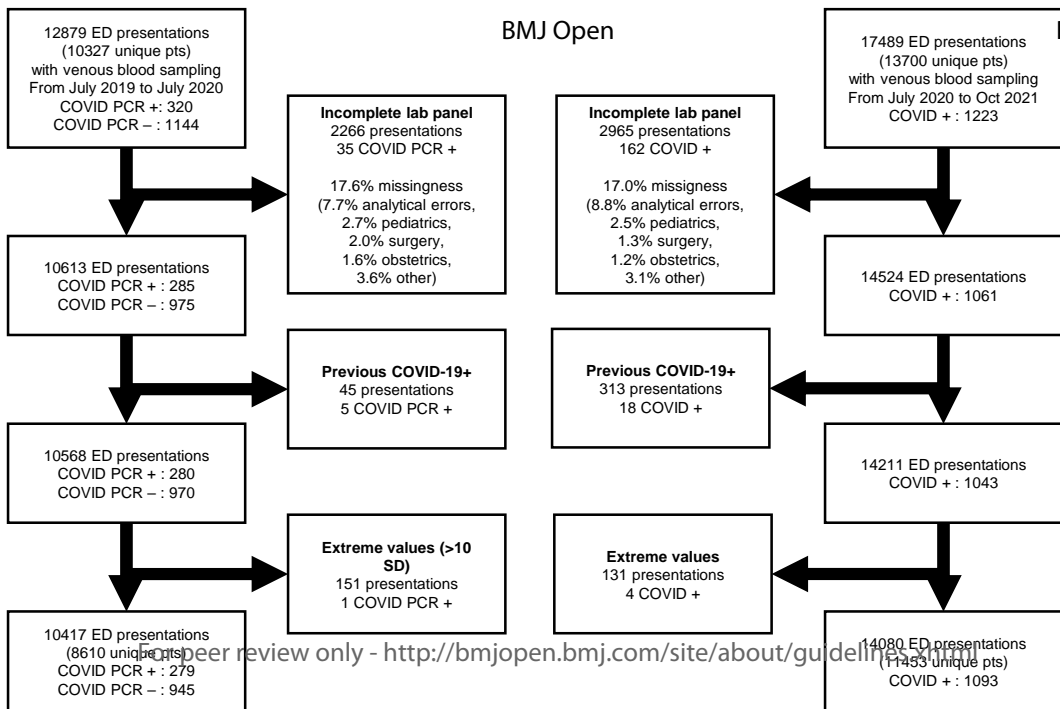

### CoLab-score

Threshold

### SARS CoV-2 PCR

- Negative or untested
- Positive

BMJ Open

-3.29

-1.64

-4.03

-2.34

1  
2  
3  
4  
5  
6  
7  
8  
9  
10  
11  
12  
13  
14  
15  
16  
17  
18  
19  
20  
21  
22  
23

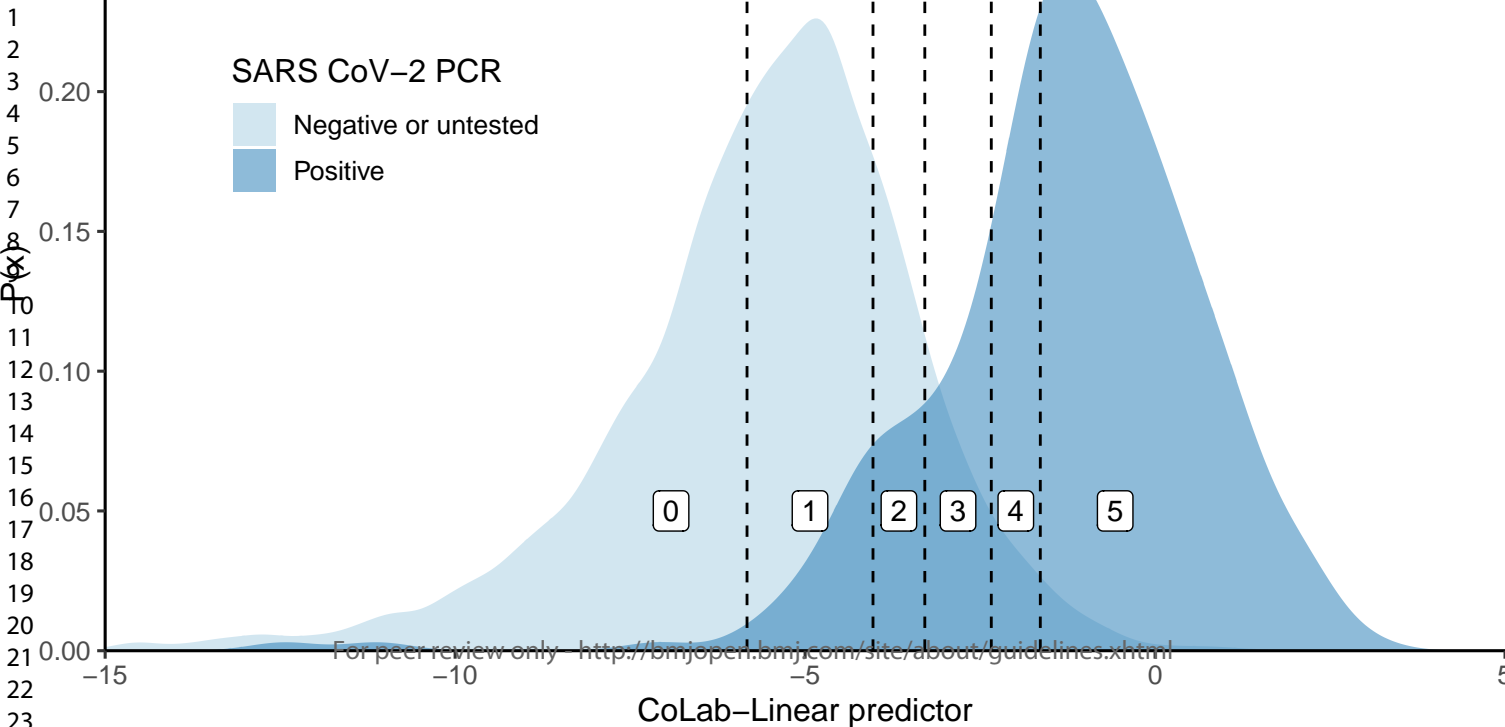

### Center 1

### Center 2

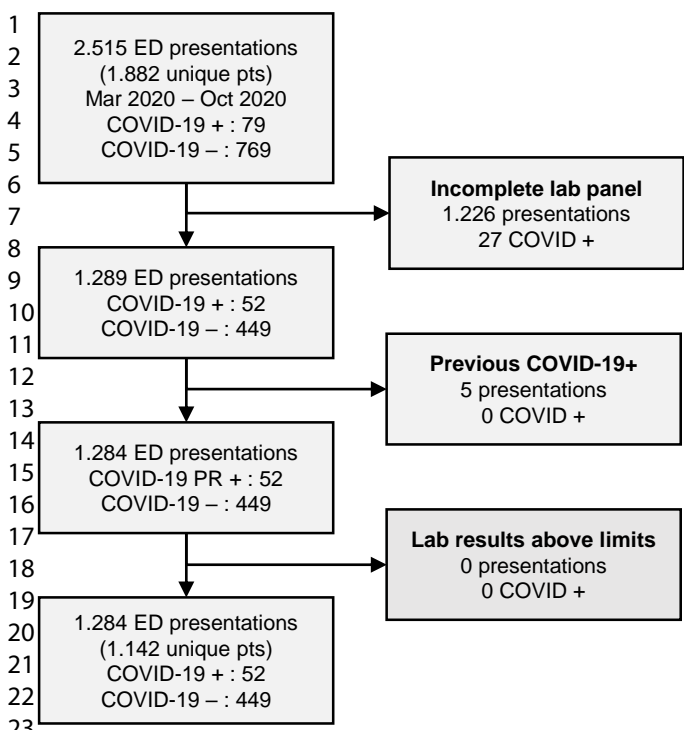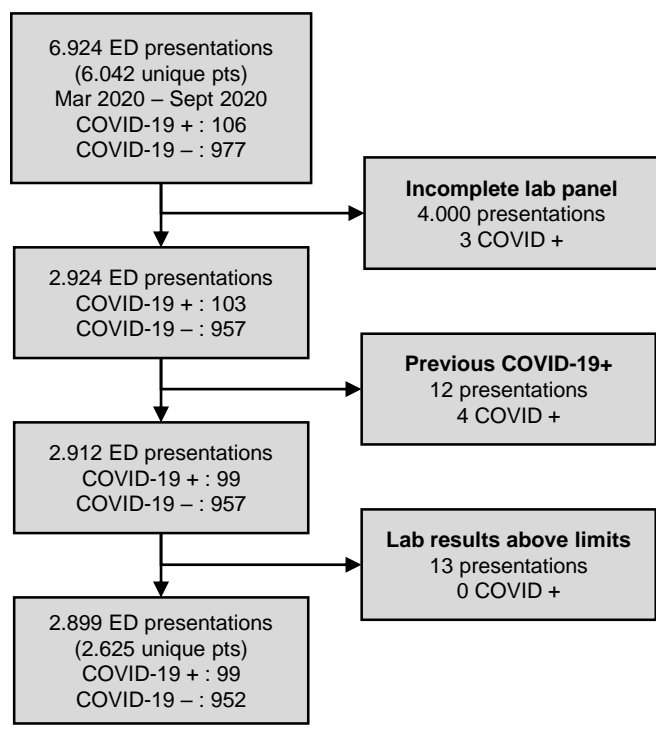

### Center 3

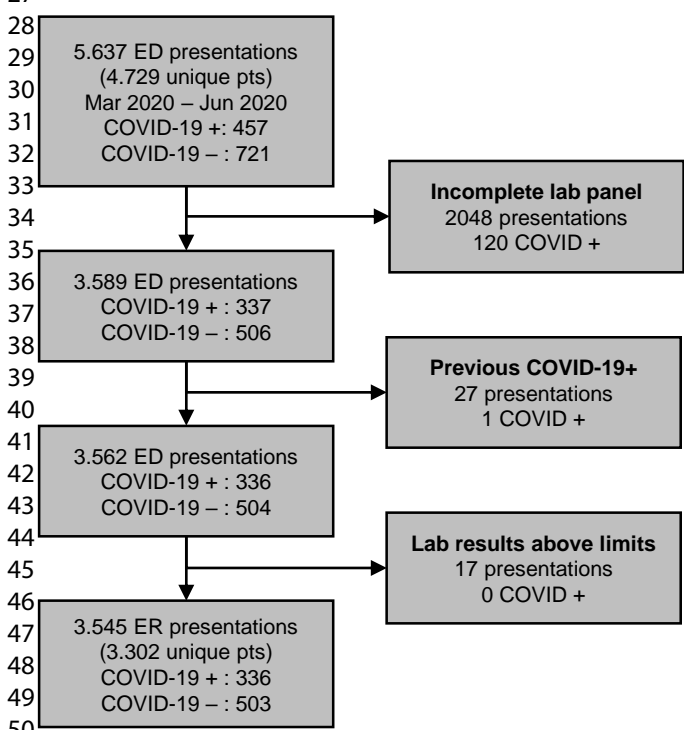

## Supplemental material 1

### Model fitting

Prior to model fitting, covariates were scaled to zero mean and unit variance, after model fitting coefficients were unscaled to obtain regression coefficients on the original scale. In adaptive lasso, weights are applied to each of the covariates present in the lasso constraint, the weight vector has to be calculated before the adaptive lasso regression is performed. Due to multicollinearity between laboratory tests in the routine lab panel, weights in the adaptive lasso were based on ridge regression estimates ( $\hat{\beta}_{ridge}$ ) as recommended by Zou. To obtain  $\hat{\beta}_{ridge}$  the optimal penalty ( $\lambda$ ) for the ridge regression was chosen using 10 fold cross-validation (CV) with area under the ROC curve (AUC) as the loss function. The  $\lambda$  corresponding to the maximum AUC was selected to obtain  $\hat{\beta}_{ridge}$ . The weight vector ( $\hat{w}$ ) was calculated by  $\hat{w} = 1/|\hat{\beta}_{ridge}|^2$ . This weight vector was then used to fit an adaptive lasso regression where  $\lambda$  was chosen by the criterion  $\pm 1$  SE of the maximum AUC.

### Model intercept correction

The linear predictor for a patient  $i$  is calculated as follows:  $lp_i = \beta_0 + \beta_1 x_{i1} + \dots + \beta_n x_{in}$ . Where  $n$  is the number of variables in the final model,  $x_{in}$  are the observed predictor variables for subject  $i$  and  $\beta_n$  the model coefficients. The linear predictor can then be converted to a probability for patient  $i$  ( $P_i$ ) by the logistic function:  $P_i = \frac{1}{1+e^{-lp_i}}$

The intercept term  $\beta_0$  is sensitive to the fraction of cases versus controls in the dataset/population. Since the model is fitted to a case-control dataset where the number cases is fixed (all patients tested positive for COVID-19) and the number of controls is randomly chosen (a 6-month period pre-COVID), the intercept term  $\beta_0$  is a result of this choice and will likely not be generalizable to the real-world setting. Prior correction is a method to correct the estimate of the intercept based on the true fraction of positives in the population,  $\tau$  (prevalence of COVID-19 in the ED) and the fraction of cases in the development dataset,  $\bar{y}$ . The intercept term  $\beta_0$  can then be corrected to obtain  $\beta_{0corrected}$  using the following formula:

$$\beta_{0corrected} = \beta_0 + \beta_{adj}$$

$$\beta_{adj} = -\ln \left[ \left( \frac{1-\tau}{\tau} \right) \left( \frac{\bar{y}}{1-\bar{y}} \right) \right]$$

In our dataset  $\bar{y} = 0.02675$  therefore:

$$\beta_{adj} = -\ln \left( \frac{1-\tau}{\tau} \right) + 3.594$$

An estimate  $\bar{\tau}$  can be used for the prevalence  $\tau$  to obtain  $\bar{\beta}_{adj}$  which can be plugged in the original linear predictor formula to obtain calibrated probabilities:

$$lp_i(\tau) = \beta_0 - \ln \left( \frac{1-\tau}{\tau} \right) + 3.594 + \beta_1 x_{i1} + \dots + \beta_n x_{in}$$

## CoLab-score

An alternative, which is the basis of the CoLab-score, is to choose a fixed probability  $P_i$  above which one considers a patient eligible for further testing. The probability can be expressed as a number needed to test. If one is willing to test 10 patients to find one positive, all patients with  $P_i \geq 0.1$  should be considered positive. In this study a number needed to test of 15 is used, therefore all patients with a  $P_i \geq 0.067$  should be considered positive. On the linear predictor scale this translates to  $\text{logit}(0.067) = -2.639$ . To determine the cutoffs for difference prevalence thresholds one solves the following equation:

$$\beta_0 + \beta_{adj} + \beta_1 x_{i1} + \dots + \beta_n x_{in} \geq -2.639$$

$$\beta_0 + \beta_1 x_{i1} + \dots + \beta_n x_{in} \geq -2.639 - \beta_{adj}$$

$$lp_i(\tau) \geq \ln\left(\frac{1-\tau}{\tau}\right) - 6.233$$

Choosing values for  $\tau$  yields the cutoffs for the CoLab score:

$$lp_i(\tau = 0.4) \geq -5.83 \text{ (CoLab-score = 1)}$$

$$lp_i(\tau = 0.1) \geq -4.03 \text{ (CoLab-score = 2)}$$

$$lp_i(\tau = 0.05) \geq -3.29 \text{ (CoLab-score = 3)}$$

$$lp_i(\tau = 0.02) \geq -2.34 \text{ (CoLab-score = 4)}$$

$$lp_i(\tau = 0.01) \geq -1.64 \text{ (CoLab-score = 5)}$$

These thresholds correspond to CoLab-scores 0 to 5. The interpretation of these scores is as follows; if the prevalence is <1%, only CoLab-score 5 should be classified as positive and CoLab-score 0 till 4 as negative. If the prevalence is 1% – 2%, CoLab-score 4 and 5 should be classified as positive and 1 – 3 negative. Similarly, with a prevalence of 2 – 5% the split is between CoLab-score 2 and 3 and with prevalence of 5 – 10% between CoLab-score 1 – 2. If the prevalence is higher than 10% only CoLab-score 0 is classified as negative. Using the CoLab-score in this fashion, aims to preserve a number need to test of 15.

## Supplemental material 2

### Vaccination status and COVID-19 ED prevalence plot

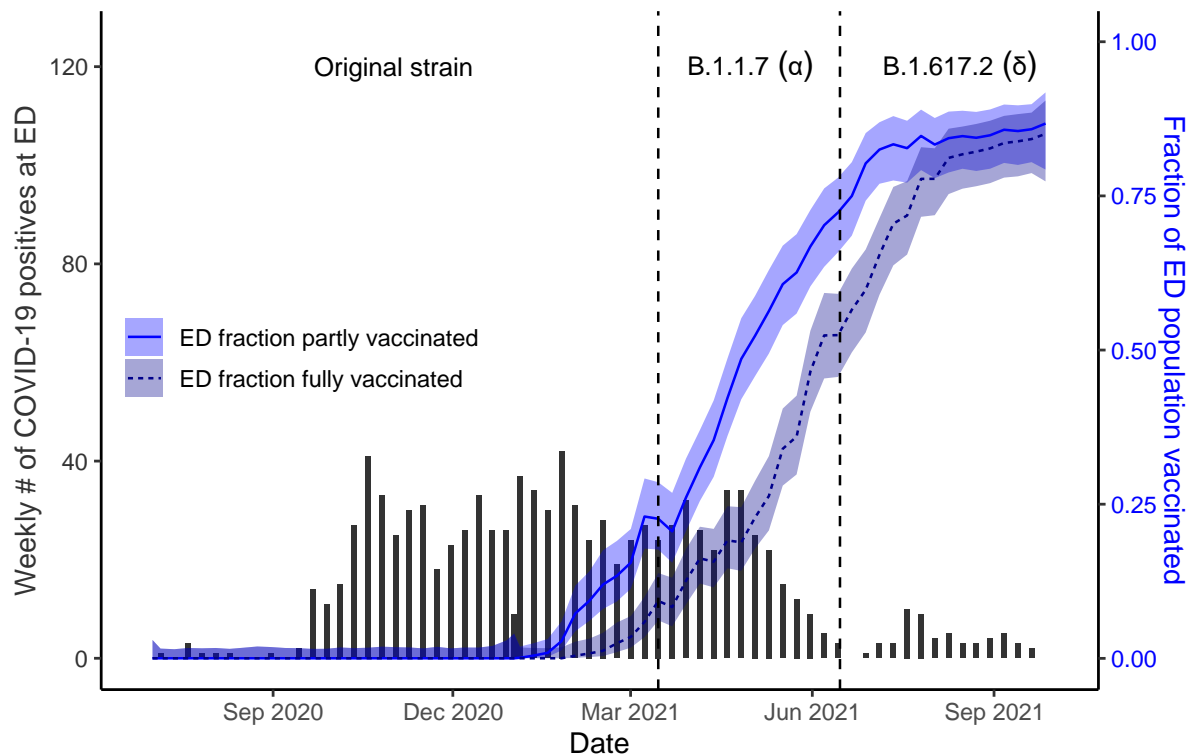

**Figure 1: Temporal validation period split into three phases characterized by weekly number of new COVID-19 cases at the emergency department (ED) and estimated fraction of ED patients vaccinated.**

The temporal validation dataset consists of ED presentations from July 2020 until October 2021. As stated in the “Materials and Methods” section, this period was split into three phases: i) from July 2020 until March 2021, no vaccination and no variants of concern identified ii) from March 2021 until June 2021, partial vaccination and B.1.1.7 (Alpha) variant identified as dominant iii) from June 2021 until October 2021, widespread vaccination and B.1.617.2 (Delta) variant identified as dominant. The ED fraction vaccinated is estimated by merging data from the Dutch national institute of public health by the date of the ED presentation and the year of birth of the patient. The gray bars depict weekly number of new COVID-19 cases at the ED, the blue lines the estimated fraction of ED patients fully or partially vaccinated.

## CoLab-score performance

| Phase                                | Cases/controls (prevalence) | AUC                   |
|--------------------------------------|-----------------------------|-----------------------|
| Original strain & no vaccinations    | 694/7999 (8.6%)             | 0.909 (0.896 - 0.923) |
| B.1.1.7 strain & partial vaccination | 287/2845 (10.1%)            | 0.937 (0.921 - 0.953) |
| B.1.617.2 strain & full vaccination  | 58/3236 (1.8%)              | 0.898 (0.857 - 0.939) |

| CoLab-score | Phase                                | Sensitivity           | Specificity           | PPV                   | NPV                   |
|-------------|--------------------------------------|-----------------------|-----------------------|-----------------------|-----------------------|
| 0           | Original strain & no vaccinations    | 0.960 (0.944 - 0.974) | 0.418 (0.407 - 0.429) | 0.135 (0.133 - 0.138) | 0.991 (0.987 - 0.994) |
|             | B.1.1.7 strain & partial vaccination | 0.983 (0.969 - 0.997) | 0.432 (0.413 - 0.450) | 0.162 (0.158 - 0.168) | 0.996 (0.992 - 0.999) |
|             | B.1.617.2 strain & full vaccination  | 0.983 (0.948 - 1.000) | 0.415 (0.396 - 0.432) | 0.030 (0.028 - 0.031) | 0.999 (0.998 - 1.000) |
| ≤1          | Original strain & no vaccinations    | 0.879 (0.854 - 0.902) | 0.789 (0.779 - 0.798) | 0.283 (0.273 - 0.294) | 0.986 (0.983 - 0.988) |
|             | B.1.1.7 strain & partial vaccination | 0.916 (0.885 - 0.948) | 0.809 (0.793 - 0.824) | 0.350 (0.332 - 0.370) | 0.989 (0.984 - 0.993) |
|             | B.1.617.2 strain & full vaccination  | 0.862 (0.776 - 0.948) | 0.780 (0.765 - 0.794) | 0.067 (0.059 - 0.074) | 0.997 (0.995 - 0.999) |
| ≤2          | Original strain & no vaccinations    | 0.813 (0.784 - 0.842) | 0.894 (0.887 - 0.901) | 0.421 (0.404 - 0.441) | 0.980 (0.978 - 0.983) |
|             | B.1.1.7 strain & partial vaccination | 0.864 (0.826 - 0.902) | 0.897 (0.885 - 0.908) | 0.484 (0.455 - 0.516) | 0.983 (0.979 - 0.988) |
|             | B.1.617.2 strain & full vaccination  | 0.690 (0.569 - 0.810) | 0.892 (0.881 - 0.902) | 0.104 (0.086 - 0.123) | 0.994 (0.991 - 0.996) |
| ≤3          | Original strain & no vaccinations    | 0.697 (0.661 - 0.731) | 0.962 (0.957 - 0.966) | 0.634 (0.605 - 0.662) | 0.971 (0.968 - 0.974) |
|             | B.1.1.7 strain & partial vaccination | 0.760 (0.711 - 0.812) | 0.963 (0.955 - 0.970) | 0.696 (0.650 - 0.739) | 0.973 (0.967 - 0.978) |
|             | B.1.617.2 strain & full vaccination  | 0.621 (0.483 - 0.741) | 0.960 (0.954 - 0.967) | 0.222 (0.178 - 0.268) | 0.993 (0.990 - 0.995) |
| ≤4          | Original strain & no vaccinations    | 0.566 (0.529 - 0.602) | 0.984 (0.981 - 0.987) | 0.775 (0.740 - 0.808) | 0.960 (0.957 - 0.963) |
|             | B.1.1.7 strain & partial vaccination | 0.645 (0.589 - 0.704) | 0.983 (0.978 - 0.988) | 0.809 (0.762 - 0.856) | 0.961 (0.955 - 0.967) |
|             | B.1.617.2 strain & full vaccination  | 0.517 (0.397 - 0.638) | 0.986 (0.982 - 0.990) | 0.400 (0.319 - 0.500) | 0.991 (0.989 - 0.993) |

**Table 2: Diagnostic performance of the CoLab-score in the temporal validation dataset, split by phase.**



Sensitivities, specificities, positive predictive values (PPV) and negative predictive values (NPV) are shown for fixed cut-offs (CoLab-score 0 till  $\leq 4$ ) with bootstrapped 95% confidence intervals in parentheses. The temporal validation dataset is split into three phases according to dominant SARS-CoV-2 strains in the Netherlands and estimated fraction of ED patients vaccinated (see Figure above). Note that “0” lists the sensitivity and NPV of CoLab-score 0 and “ $\leq 4$ ” lists the specificity and PPV of CoLab-score 5.

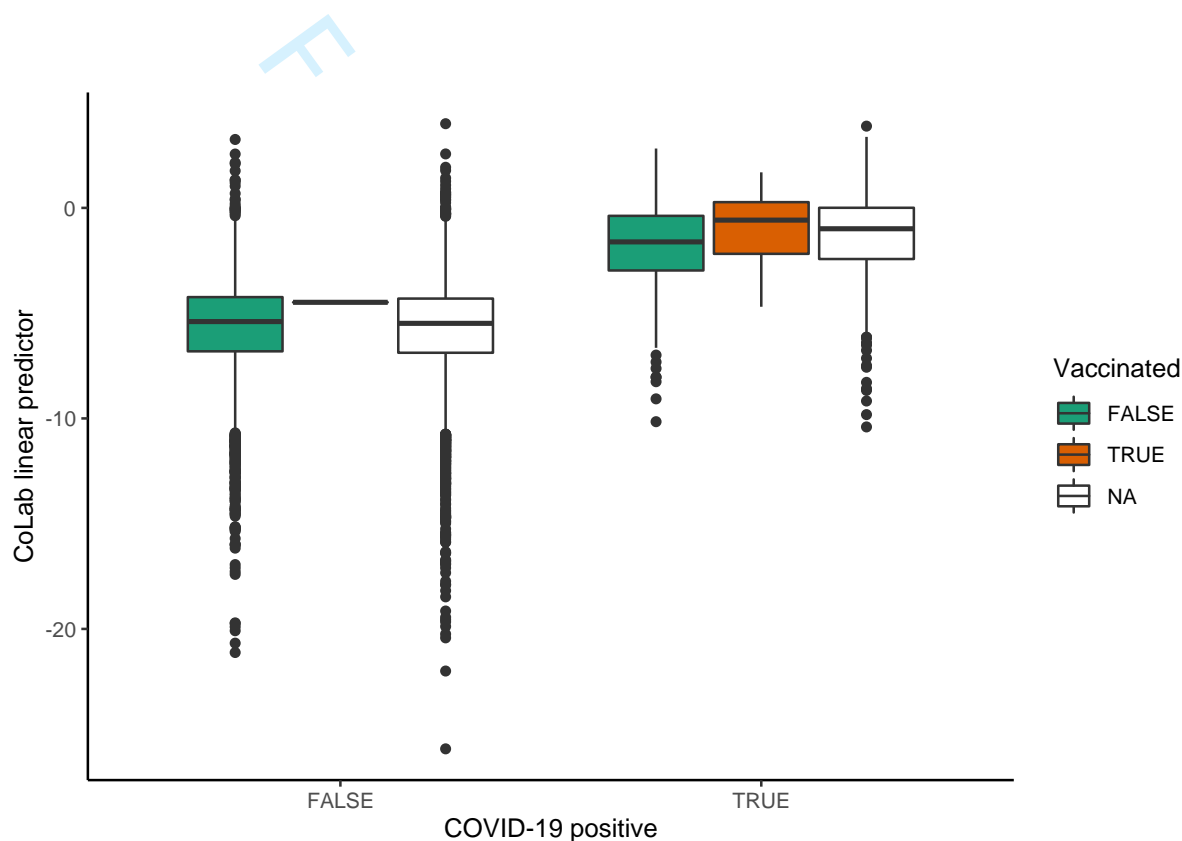

**Figure 2: Boxplots of CoLab linear predictor versus COVID-19 positive, split by registered vaccination status.**

The CoLab linear predictor is calculated for all ED presentations in the temporal validation set. Presentations who are registered as vaccinated are labeled TRUE ( $N = 13$ ).

Presentations before vaccine roll-out are labeled FALSE ( $N = 5855$ ). Presentations during vaccine roll-out but where no status is registered are labeled NA ( $N = 8212$ ). Of the 13 presentations who were registered as vaccinated, 12 were COVID-19 positive and 1 negative.

1  
2  
3 *Note that vaccination status is only registered if a patient is SARS-CoV-2 PCR positive or*  
4 *considered positive until proven otherwise, therefore there is only one COVID-19 negative*  
5 *patient with a registered vaccination status.*  
6  
7  
8  
9  
10  
11  
12  
13  
14  
15  
16  
17  
18  
19  
20  
21  
22  
23  
24  
25  
26  
27  
28  
29  
30  
31  
32  
33  
34  
35  
36  
37  
38  
39  
40  
41  
42  
43  
44  
45  
46  
47  
48  
49  
50  
51  
52  
53  
54  
55  
56  
57  
58  
59  
60

For peer review only

### Supplemental material 3

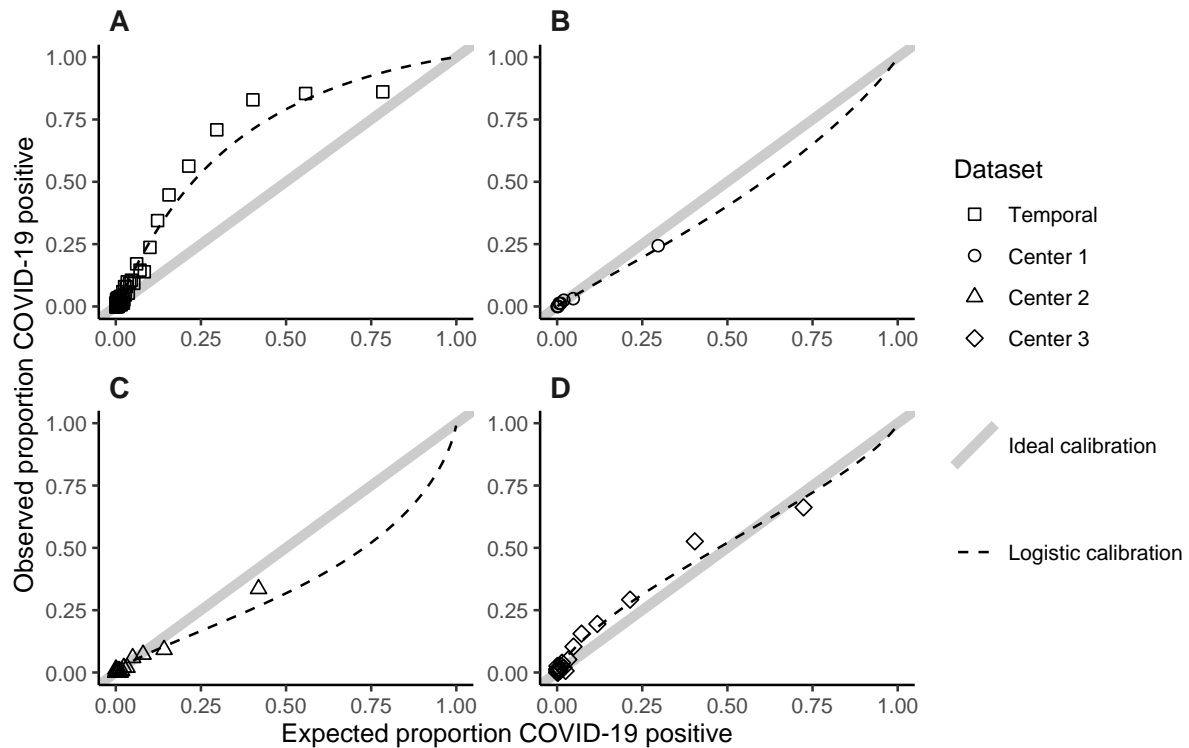

**Figure 1: CoLab-score calibration plots of the temporal validation (A), external validation center 1 (B), external validation center 2 (C) and external validation center 3 (D).**

*In the calibration plots, the proportion of observed COVID-19 positives versus expected probabilities are plotted. Observations are grouped with an average of 150 observations per group. The expected probabilities follow from applying the inverse logit function to the CoLab-linear predictor calculated from Table 2. If the observed proportion in an external dataset is lower than the expected proportion, this means risks are over-estimated, if the observed fraction is higher, risks are under-estimated. Ideally, observed proportions are equal to expected proportions, this ideal-calibration-line is shown as a straight line through the origin with a slope of 1. The logistic calibration line is a logistic regression fit of the predicted probabilities. [Intercept, slope] for plots A-D: A [1.34, 1.08], B [-0.39, 0.92], C [-0.76, 0.77], D [0.08, 0.79]. Although no validation datasets show perfect calibration, this is the result of differences in COVID-19 prevalence in the temporal validation dataset (7.4% versus 2.2%) and differences in calibration of laboratory equipment in the three external centers.*

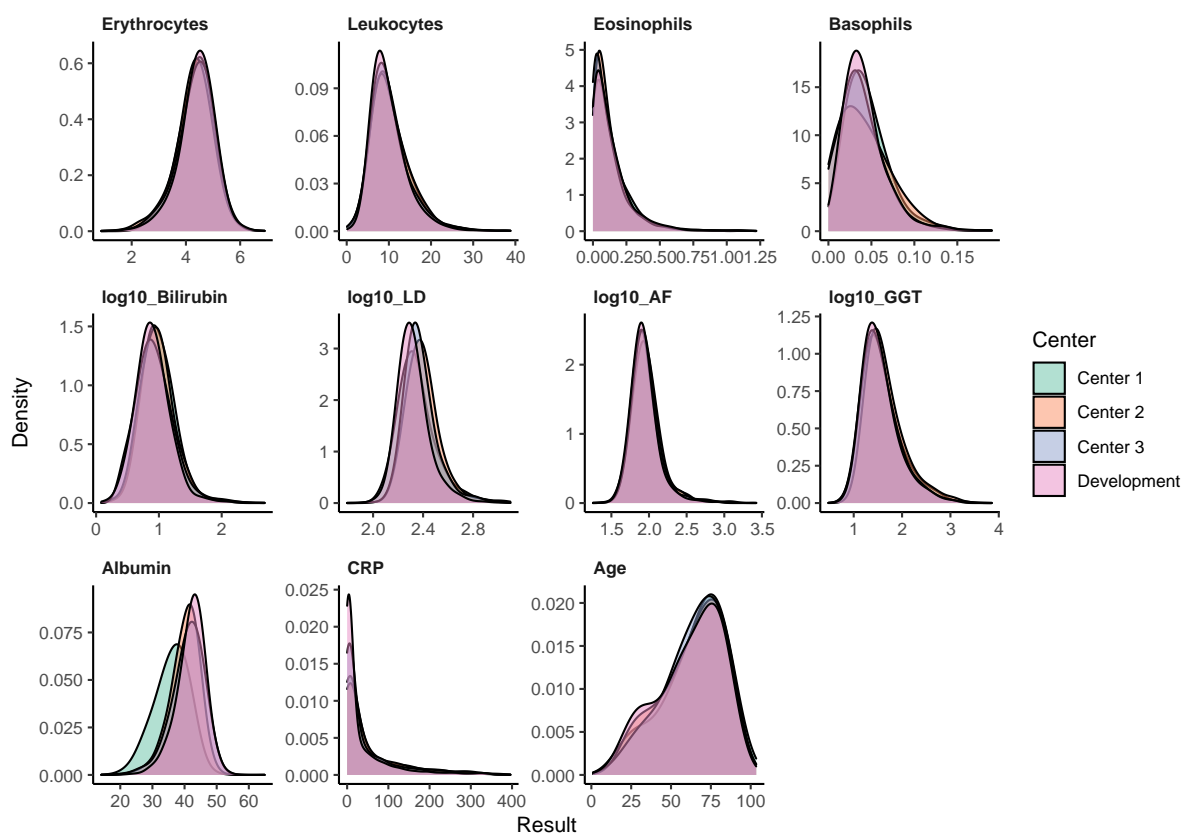

**Figure 2: Probability density plots of laboratory parameters.**

Probability density plots are shown for all control patients of the development dataset and the three external centers. Ideally all distributions should overlap since this implies that control patient populations are most likely similar in the development dataset to the external datasets. When comparing the distribution of the CoLab variables for all control-patients across different external validation datasets, albumin and LD show the largest deviations.

## Supplemental material 4

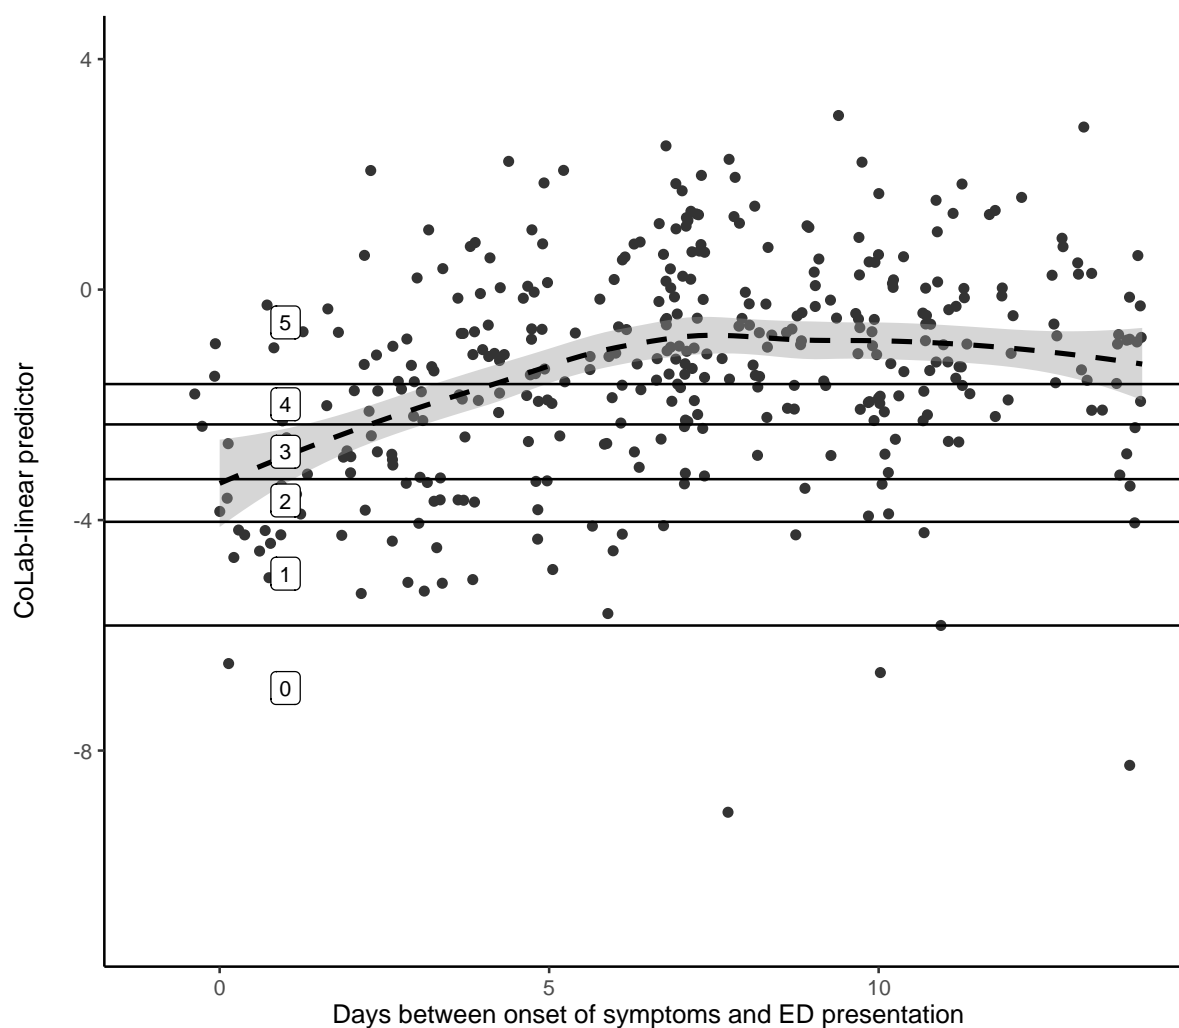

**Figure 1: Association between the CoLab-linear predictor and the duration of COVID-19-related symptoms.**

*For all PCR-positive ED presentations in the development and temporal validation dataset, the CoLab-linear predictor is plotted against the duration of COVID-related symptoms as registered in the electronic patient records. Patients with unknown duration are not plotted. Patients without symptoms were plotted at 0 days. The solid horizontal lines represent the CoLab-score thresholds, the dashed line is a LOESS regression curve with 95% CI. As the duration of symptoms is an integer, some random jitter was added to the days, for visualization purposes. Note that only the first 14 days are shown in this graph.*

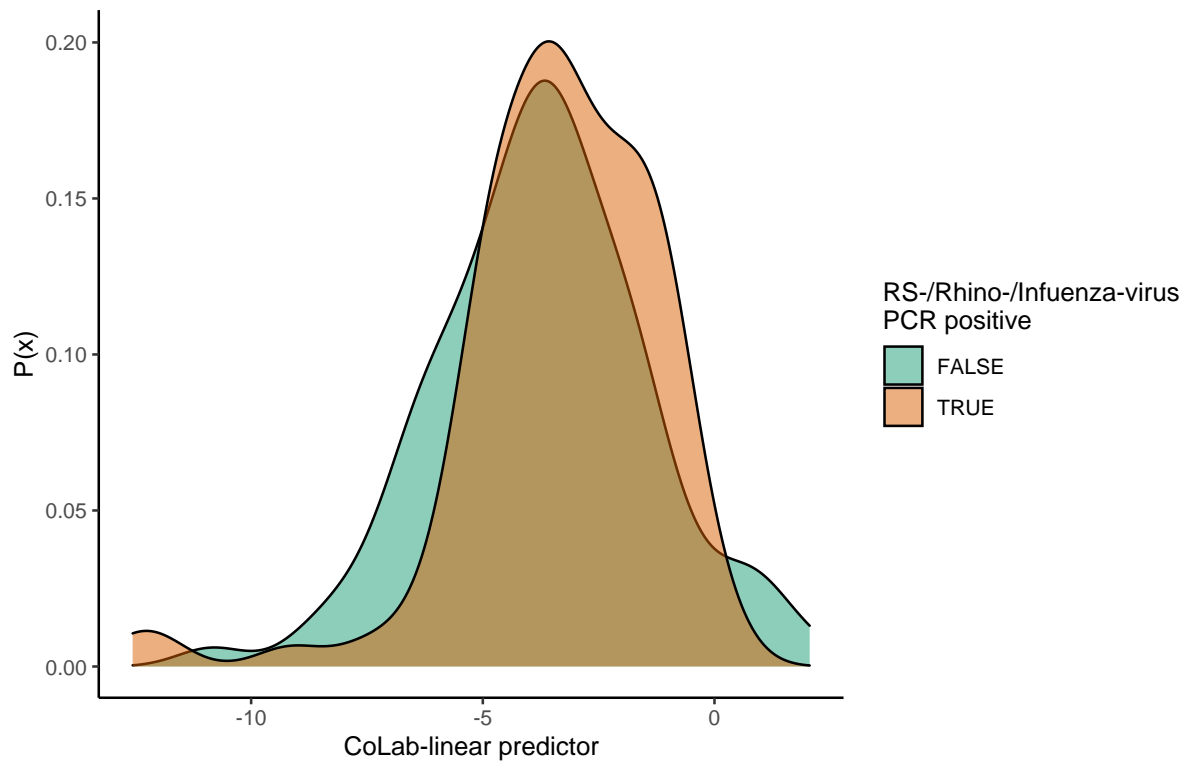

**Figure 2: Probability density plot of CoLab-score for RS-, Rhino- and Influenza-virus PCR tested ED patients.**

*For 183 ED presentations that were PCR tested for either RS-, Rhino- and Influenza-virus the CoLab-score was calculated. 91 presentations were PCR positive, 92 were PCR negative. The CoLab-score is only marginally elevated for PCR positive patients, the area under the ROC-curve in separating both groups is 0.573 (95% CI: 0.4896-0.6563).*

## TRIPOD Checklist: Prediction Model Development and Validation

| Section/Topic                | Item | Checklist Item | Page                                                                                                                                                                                                  |           |
|------------------------------|------|----------------|-------------------------------------------------------------------------------------------------------------------------------------------------------------------------------------------------------|-----------|
| <b>Title and abstract</b>    |      |                |                                                                                                                                                                                                       |           |
| Title                        | 1    | D;V            | Identify the study as developing and/or validating a multivariable prediction model, the target population, and the outcome to be predicted.                                                          | 1         |
| Abstract                     | 2    | D;V            | Provide a summary of objectives, study design, setting, participants, sample size, predictors, outcome, statistical analysis, results, and conclusions.                                               | 3, 4      |
| <b>Introduction</b>          |      |                |                                                                                                                                                                                                       |           |
| Background and objectives    | 3a   | D;V            | Explain the medical context (including whether diagnostic or prognostic) and rationale for developing or validating the multivariable prediction model, including references to existing models.      | 6, 7      |
|                              | 3b   | D;V            | Specify the objectives, including whether the study describes the development or validation of the model or both.                                                                                     | 7         |
| <b>Methods</b>               |      |                |                                                                                                                                                                                                       |           |
| Source of data               | 4a   | D;V            | Describe the study design or source of data (e.g., randomized trial, cohort, or registry data), separately for the development and validation data sets, if applicable.                               | 8, 11-12  |
|                              | 4b   | D;V            | Specify the key study dates, including start of accrual; end of accrual; and, if applicable, end of follow-up.                                                                                        | 8         |
| Participants                 | 5a   | D;V            | Specify key elements of the study setting (e.g., primary care, secondary care, general population) including number and location of centres.                                                          | 8         |
|                              | 5b   | D;V            | Describe eligibility criteria for participants.                                                                                                                                                       | 8, 9, S1  |
|                              | 5c   | D;V            | Give details of treatments received, if relevant.                                                                                                                                                     | N/A       |
| Outcome                      | 6a   | D;V            | Clearly define the outcome that is predicted by the prediction model, including how and when assessed.                                                                                                | 9         |
|                              | 6b   | D;V            | Report any actions to blind assessment of the outcome to be predicted.                                                                                                                                | N/A       |
| Predictors                   | 7a   | D;V            | Clearly define all predictors used in developing or validating the multivariable prediction model, including how and when they were measured.                                                         | 8, 9      |
|                              | 7b   | D;V            | Report any actions to blind assessment of predictors for the outcome and other predictors.                                                                                                            | N/A       |
| Sample size                  | 8    | D;V            | Explain how the study size was arrived at.                                                                                                                                                            | N/A       |
| Missing data                 | 9    | D;V            | Describe how missing data were handled (e.g., complete-case analysis, single imputation, multiple imputation) with details of any imputation method.                                                  | 9         |
| Statistical analysis methods | 10a  | D              | Describe how predictors were handled in the analyses.                                                                                                                                                 | 10        |
|                              | 10b  | D              | Specify type of model, all model-building procedures (including any predictor selection), and method for internal validation.                                                                         | 10-12, S1 |
|                              | 10c  | V              | For validation, describe how the predictions were calculated.                                                                                                                                         | 16        |
|                              | 10d  | D;V            | Specify all measures used to assess model performance and, if relevant, to compare multiple models.                                                                                                   | 11-13     |
|                              | 10e  | V              | Describe any model updating (e.g., recalibration) arising from the validation, if done.                                                                                                               | N/A       |
| Risk groups                  | 11   | D;V            | Provide details on how risk groups were created, if done.                                                                                                                                             | N/A       |
| Development vs. validation   | 12   | V              | For validation, identify any differences from the development data in setting, eligibility criteria, outcome, and predictors.                                                                         | 22        |
| <b>Results</b>               |      |                |                                                                                                                                                                                                       |           |
| Participants                 | 13a  | D;V            | Describe the flow of participants through the study, including the number of participants with and without the outcome and, if applicable, a summary of the follow-up time. A diagram may be helpful. | F1        |
|                              | 13b  | D;V            | Describe the characteristics of the participants (basic demographics, clinical features, available predictors), including the number of participants with missing data for predictors and outcome.    | T1        |
|                              | 13c  | V              | For validation, show a comparison with the development data of the distribution of important variables (demographics, predictors and outcome).                                                        | S3        |
| Model development            | 14a  | D              | Specify the number of participants and outcome events in each analysis.                                                                                                                               | F1, F3    |
|                              | 14b  | D              | If done, report the unadjusted association between each candidate predictor and outcome.                                                                                                              | N/A       |
| Model specification          | 15a  | D              | Present the full prediction model to allow predictions for individuals (i.e., all regression coefficients, and model intercept or baseline survival at a given time point).                           | T2        |
|                              | 15b  | D              | Explain how to use the prediction model.                                                                                                                                                              | T2, S1    |
| Model performance            | 16   | D;V            | Report performance measures (with CIs) for the prediction model.                                                                                                                                      | T3, T4    |
| Model-updating               | 17   | V              | If done, report the results from any model updating (i.e., model specification, model performance).                                                                                                   | N/A       |
| <b>Discussion</b>            |      |                |                                                                                                                                                                                                       |           |
| Limitations                  | 18   | D;V            | Discuss any limitations of the study (such as nonrepresentative sample, few events per predictor, missing data).                                                                                      | 21-23     |
| Interpretation               | 19a  | V              | For validation, discuss the results with reference to performance in the development data, and any other validation data.                                                                             | 19-20     |
|                              | 19b  | D;V            | Give an overall interpretation of the results, considering objectives, limitations, results from similar studies, and other relevant evidence.                                                        | 19-20     |
| Implications                 | 20   | D;V            | Discuss the potential clinical use of the model and implications for future research.                                                                                                                 | 20-21     |
| <b>Other information</b>     |      |                |                                                                                                                                                                                                       |           |
| Supplementary information    | 21   | D;V            | Provide information about the availability of supplementary resources, such as study protocol, Web calculator, and data sets.                                                                         | N/A       |
| Funding                      | 22   | D;V            | Give the source of funding and the role of the funders for the present study.                                                                                                                         | N/A       |

\*Items relevant only to the development of a prediction model are denoted by D, items relating solely to a validation of a prediction model are denoted by V, and items relating to both are denoted D;V. We recommend using the TRIPOD Checklist in conjunction with the TRIPOD Explanation and Elaboration document. S = Supplemental material, F = Figure, T = Table.

# BMJ Open

## Development and validation of an early warning score to identify COVID-19 in the emergency department based on routine laboratory tests: a multicenter case-control study

|                                 |                                                                                                                                                                                                                                                                                                                                                                                                                                                                                                                                                                                                                                                                                                                                                                                                                                                              |
|---------------------------------|--------------------------------------------------------------------------------------------------------------------------------------------------------------------------------------------------------------------------------------------------------------------------------------------------------------------------------------------------------------------------------------------------------------------------------------------------------------------------------------------------------------------------------------------------------------------------------------------------------------------------------------------------------------------------------------------------------------------------------------------------------------------------------------------------------------------------------------------------------------|
| Journal:                        | <i>BMJ Open</i>                                                                                                                                                                                                                                                                                                                                                                                                                                                                                                                                                                                                                                                                                                                                                                                                                                              |
| Manuscript ID                   | bmjopen-2021-059111.R1                                                                                                                                                                                                                                                                                                                                                                                                                                                                                                                                                                                                                                                                                                                                                                                                                                       |
| Article Type:                   | Original research                                                                                                                                                                                                                                                                                                                                                                                                                                                                                                                                                                                                                                                                                                                                                                                                                                            |
| Date Submitted by the Author:   | 01-Mar-2022                                                                                                                                                                                                                                                                                                                                                                                                                                                                                                                                                                                                                                                                                                                                                                                                                                                  |
| Complete List of Authors:       | Boer, Arjen-Kars; Catharina Hospital Deneer, Ruben; Catharina Hospital, ; Eindhoven University of Technology, Maas, Maaïke; Catharina Ziekenhuis, emergency department Ammerlaan, Heidi; Catharina Hospital van Balkom, Roland; Catharina Hospital Thijssen, Wendy; Catharina ziekenhuis, Emergency medicine Bennenbroek, Sophie; Catharina Hospital Leers, Mathie; Zuyderland Medical Centre Heerlen, Clinical Chemistry & Hematology Martens, Remy; Zuyderland Medical Centre Heerlen, Clinical Chemistry & Hematology Buijs, Madelon; Atalmedial Kerremans, Jos; Alrijne Hospital Location Leiderdorp Messchaert, Muriël ; Gelre Hospitals van Suijlen, Jeroen; Gelre Hospitals van Riel, Natal; Eindhoven University of Technology, ; Amsterdam University Medical Centres Scharnhorst, Volkher; Catharina Hospital; Eindhoven University of Technology, |
| <b>Primary Subject Heading</b>: | Emergency medicine                                                                                                                                                                                                                                                                                                                                                                                                                                                                                                                                                                                                                                                                                                                                                                                                                                           |
| Secondary Subject Heading:      | Health informatics, Infectious diseases                                                                                                                                                                                                                                                                                                                                                                                                                                                                                                                                                                                                                                                                                                                                                                                                                      |
| Keywords:                       | COVID-19, STATISTICS & RESEARCH METHODS, ACCIDENT & EMERGENCY MEDICINE, Clinical chemistry < PATHOLOGY, Health informatics < BIOTECHNOLOGY & BIOINFORMATICS                                                                                                                                                                                                                                                                                                                                                                                                                                                                                                                                                                                                                                                                                                  |
|                                 |                                                                                                                                                                                                                                                                                                                                                                                                                                                                                                                                                                                                                                                                                                                                                                                                                                                              |

SCHOLARONE™  
Manuscripts





I, the Submitting Author has the right to grant and does grant on behalf of all authors of the Work (as defined in the below author licence), an exclusive licence and/or a non-exclusive licence for contributions from authors who are: i) UK Crown employees; ii) where BMJ has agreed a CC-BY licence shall apply, and/or iii) in accordance with the terms applicable for US Federal Government officers or employees acting as part of their official duties; on a worldwide, perpetual, irrevocable, royalty-free basis to BMJ Publishing Group Ltd ("BMJ") its licensees and where the relevant Journal is co-owned by BMJ to the co-owners of the Journal, to publish the Work in this journal and any other BMJ products and to exploit all rights, as set out in our [licence](#).

The Submitting Author accepts and understands that any supply made under these terms is made by BMJ to the Submitting Author unless you are acting as an employee on behalf of your employer or a postgraduate student of an affiliated institution which is paying any applicable article publishing charge ("APC") for Open Access articles. Where the Submitting Author wishes to make the Work available on an Open Access basis (and intends to pay the relevant APC), the terms of reuse of such Open Access shall be governed by a Creative Commons licence – details of these licences and which [Creative Commons](#) licence will apply to this Work are set out in our licence referred to above.

Other than as permitted in any relevant BMJ Author's Self Archiving Policies, I confirm this Work has not been accepted for publication elsewhere, is not being considered for publication elsewhere and does not duplicate material already published. I confirm all authors consent to publication of this Work and authorise the granting of this licence.

1  
2  
3  
4 1 **Development and validation of an early warning score to identify**  
5  
6 2 **COVID-19 in the emergency department based on routine laboratory**  
7  
8  
9 3 **tests: a multicenter case-control study**  
10  
11  
12 4

15 5 Arjen-Kars Boer<sup>1\*</sup>, Ruben Deneer<sup>1,2\*\*†</sup>, Maaïke Maas<sup>3</sup>, Heidi S. M. Ammerlaan<sup>4</sup>, Roland H. H.  
16  
17 6 van Balkom<sup>5</sup>, Wendy A.M.H. Thijssen<sup>3</sup>, Sophie Bennenbroek<sup>3</sup>, Mathie P. G. Leers<sup>6</sup>, Remy  
18  
19 7 J.H. Martens<sup>6</sup>, Madelon M. Buijs<sup>7</sup>, Jos J. Kerremans<sup>8</sup>, Muriël Messchaert<sup>9</sup>, Jeroen D.E. van  
20  
21 8 Suijlen<sup>9</sup>, Natal A.W. van Riel<sup>2,10</sup> and Volkher Scharnhorst<sup>1,2</sup>  
22  
23  
24  
25 9

26  
27  
28 10 \* Both authors contributed equally  
29

30  
31 11 † Corresponding author  
32  
33  
34 12

35  
36  
37 13 1 Department of Laboratory Medicine, Catharina Hospital Eindhoven,  
38  
39 14 Michelangelolaan 2, 5623 EJ, Eindhoven, the Netherlands

40  
41 15 2 Faculty of Biomedical Engineering, Technical University Eindhoven, Groene  
42  
43 16 Loper 3, 5612 AE, Eindhoven, the Netherlands

44  
45  
46 17 3 Department of Emergency Medicine, Catharina Hospital Eindhoven,  
47  
48 18 Michelangelolaan 2, 5623 EJ, Eindhoven, the Netherlands

49  
50 19 4 Department of Internal Medicine, Catharina Hospital Eindhoven,  
51  
52 20 Michelangelolaan 2, 5623 EJ, Eindhoven, the Netherlands

53  
54  
55 21 5 Department of Pulmonary Diseases, Catharina Hospital Eindhoven,  
56  
57 22 Michelangelolaan 2, 5623 EJ, Eindhoven, the Netherlands  
58  
59  
60

- 1  
2  
3 23 6 Department of Laboratory Medicine, Zuyderland Medical Center, Dr. H. van der  
4  
5 24 Hoffplein 1, 6162 BG, Sittard-Geleen, the Netherlands  
6  
7 25 7 Atalmedial Diagnostic Centers, Jan Tooropstraat 138, 1061 AD Amsterdam, the  
8  
9 Netherlands  
10 26  
11  
12 27 8 Department of Medical Microbiology & Infection Prevention, Alrijne Hospital,  
13  
14 28 Simon Smitweg 1, 2353 GA Leiderdorp, the Netherlands  
15  
16  
17 29 9 Department of Clinical Chemistry, Gelre Hospital, Albert Schweitzerlaan 31, 7334  
18  
19 30 DZ Apeldoorn, the Netherlands  
20  
21 31 10 Amsterdam University Medical Centers, University of Amsterdam, Meibergdreef  
22  
23 32 9, 1105 AZ Amsterdam, the Netherlands.  
24  
25  
26  
27 33  
28  
29

### 30 **Keywords**

31  
32 35 COVID-19, SARS-CoV-2, emergency department, triage, early warning score, prediction  
33  
34 36 model, routine laboratory tests  
35  
36  
37  
38 37  
39

### 40 **Corresponding author**

41 38  
42  
43 39 Ruben Deneer  
44  
45  
46 40 Michelangelolaan 2  
47  
48  
49 41 5623 EJ Eindhoven, the Netherlands  
50  
51  
52 42 [ruben.deneer@catharinaziekenhuis.nl](mailto:ruben.deneer@catharinaziekenhuis.nl)  
53  
54  
55  
56  
57  
58  
59  
60

## 43 **Abstract**

44 **Objectives:** Identifying patients with a possible SARS-CoV-2 infection in the emergency  
45 department (ED) is challenging. Symptoms differ, incidence rates vary and test capacity may  
46 be limited. As PCR testing all ED patients is neither feasible nor effective in most centers, a  
47 rapid, objective, low-cost early warning score to triage ED patients for a possible infection is  
48 developed.

49 **Design:** Case-control study.

50 **Setting:** Secondary and tertiary hospitals in the Netherlands.

51 **Participants:** Patients presenting at the ED with venous blood sampling from July 2019 to  
52 July 2020 (N = 10417, 279 SARS-CoV-2 positive). The temporal validation cohort covered  
53 the period from July 2020 to October 2021 (N = 14080, 1093 SARS-CoV-2 positive). The  
54 external validation cohort consisted of patients presenting at the ED of three hospitals in the  
55 Netherlands (N = 12061, 652 SARS-CoV-2 positive).

56 **Primary outcome measures** The primary outcome was one or more positive SARS-CoV-2  
57 PCR-test results, within one day prior to, or one week after, ED presentation.

58 **Results:** The resulting “CoLab-score” consists of 10 routine laboratory measurements, and  
59 age. The score showed good discriminative ability (AUC: 0.930, 95% CI: 0.909 to 0.945).  
60 The lowest CoLab-score had a high sensitivity for COVID-19 (0.984, 95% CI: 0.970 to 0.991,  
61 specificity: 0.411, 95% CI: 0.285 to 0.520). Conversely, the highest score had high specificity  
62 (0.978, 95% CI: 0.973 to 0.983, sensitivity: 0.608, 95% CI: 0.522 to 0.685). Results were  
63 confirmed in temporal and external validation.

64 **Conclusions:** The CoLab-score is based on routine laboratory measurements and is available  
65 within one hour after presentation. Depending on the prevalence, COVID-19 may be safely

1  
2  
3 66 ruled-out in over one third of ED presentations. Highly suspect cases can be identified  
4  
5 67 regardless of presenting symptoms. The CoLab-score is continuous, in contrast to the binary  
6  
7 68 outcome of lateral flow testing, and can guide PCR testing and triage ED patients.  
8  
9

10  
11 69

## 12 13 14 70 **Article summary**

### 15 16 17 71 Strengths and limitations of this study

- 18  
19 72 • A comprehensive panel of 28 laboratory tests was measured for 10.417 emergency  
20  
21 73 department (ED) presentations and combined with SARS-CoV-2 PCR test results.
- 22  
23 74 • Using adaptive lasso regression analysis, the panel of 28 laboratory tests was reduced  
24  
25 75 to a single score consisting of a subset of 10 routine ED laboratory tests and age.
- 26  
27 76 • The score was temporally validated from July 2020 to October 2021, in the presence of  
28  
29 77 vaccine roll-out and emergence of new SARS-CoV-2 variants.
- 30  
31 78 • The score was externally validated in 3 other centers in the Netherlands.
- 32  
33 79 • Missingness in the panel of laboratory tests varied between external centers, limiting  
34  
35 80 generalizability of the score to the ED population for which the complete panel of  
36  
37 81 laboratory tests was available.  
38  
39  
40  
41  
42

43 82  
44  
45  
46  
47  
48  
49  
50  
51  
52  
53  
54  
55  
56  
57  
58  
59  
60

## 83 Introduction

84 COVID-19, caused by the severe acute respiratory syndrome coronavirus 2 (SARS-CoV-2),  
85 has evolved into a global pandemic in 2020 [1]. For emergency department (ED) physicians,  
86 identifying presenting patients with a possible COVID-19 infection remains challenging since  
87 symptoms like fever, shortness of breath or coughing overlap with other illnesses [2,3]. It is  
88 crucial however, to identify a possible COVID-19 infection as early as possible. Early  
89 identification prevents further spreading and protects hospital staff by isolating a suspected  
90 patient, pending the results of a SARS-COV-2 RNA PCR test and/or chest CT. Conversely,  
91 when PCR testing or isolation treatment capacity is limited, ruling-out COVID-19 as soon as  
92 possible can save valuable resources.

93 In the era of electronic health records and clinical prediction models, developing an early  
94 warning score that can assist ED physicians in identifying patients presenting at the ED with  
95 COVID-19 is of great value. Moreover, if only routine ED test results are required as input,  
96 the score can be easily adopted by EDs worldwide, potentially reduce diagnostic costs and  
97 accelerate patient triage.

98 Many COVID-19 prediction models have already been developed, the living systematic  
99 review by Wynants et. al [4] provides an extensive overview and critical appraisal.

100 Unfortunately, only few models have found their way into routine care at the ED [5,6]. Early  
101 models were based on relatively small sample sizes, hampered by selection bias or were over-  
102 fitted by selecting too many features [4–6]. Aside from methodological shortcomings of early  
103 models, most models are not developed as an early warning score for all ED patients. Firstly,  
104 they require features from tests that are not routinely performed or logged for all ED patients  
105 (e.g. the CO-RADS score from a CT-scan [7] or non-lab based clinical variables in the  
106 PRIEST EWS [8]) and are therefore not straightforward to implement or scale to a large ED  
107 patient population. Secondly, the population on which models are commonly based, are PCR-

1  
2  
3 108 tested patients, i.e. a pre-selection of a possible COVID-19 infection has already been done by  
4  
5 109 physicians.

7  
8 110 Only two studies were identified that focus on patients presenting at the ED, include  
9  
10 111 unsuspected (and pre-pandemic) patients as controls, and rely solely on routine (laboratory)  
11  
12 112 tests [9,10].

15 113 In this study we report the development and validation of an early warning score that, based  
16  
17 114 on routine ED laboratory tests, estimates the risk of a possible COVID-19 infection in patients  
18  
19 115 who undergo routine laboratory testing at presentation. The score can assist ED physicians in  
20  
21 116 triaging patients and prevent further transmission of COVID-19 by quickly identifying  
22  
23  
24 117 possibly infected patients or ruling out a possible infection when resources are scarce.  
25  
26  
27  
28  
29  
30  
31  
32  
33  
34  
35  
36  
37  
38  
39  
40  
41  
42  
43  
44  
45  
46  
47  
48  
49  
50  
51  
52  
53  
54  
55  
56  
57  
58  
59  
60

## 118 **Methods**

### 119 *Study design*

120 This is a retrospective case-control study where routine laboratory test results, combined with  
121 age and gender, from all patient presenting at the emergency department (ED) of the  
122 Catharina Hospital Eindhoven from July 2019 to July 2020 were combined with SARS-CoV-  
123 2 PCR test results in a development dataset. A model that could predict the presence of a  
124 COVID-19 infection was fit to this dataset. Performance of the model was assessed by i)  
125 internal validation, ii) temporal validation and iii) external validation by using data from the  
126 ED of three other centers. The study was reviewed by the Medical research Ethics  
127 Committees United (MEC-U) under study number W20.071, which confirmed that the  
128 Medical Research Involving Human Subjects Act (In Dutch: WMO) does not apply to this  
129 study. The study was thereafter reviewed and approved by the internal hospital review board.

130

### 131 *Patient and Public Involvement*

132 Patients were not involved in the design, conduct or reporting of this study.

133

### 134 *Development dataset*

135 All ED presentations at the Catharina Hospital Eindhoven from July 2019 to July 2020 were  
136 included in the development dataset, provided that routine laboratory testing had been  
137 requested by the attending ED physician. The rationale for this inclusion period is to limit the  
138 effect of seasonal variation in the ED patient population by including the summer, fall and  
139 winter season of 2019 (control patients) and the winter, spring and summer season of 2020  
140 (case and control patients). The routine laboratory panel at the ED consists of 28 laboratory  
141 tests. In some cases not all tests in the routine panel were requested or one or more



1  
2  
3 142 quantitative results were not available due to analytical interference (hemolysis, lipemia or  
4  
5 143 icterus). The routine ED laboratory panel is requested for (adult) patients presenting with  
6  
7 144 abdominal pain, chest pain, shortness of breath, syncope, sepsis or other non-specific  
8  
9 145 complaints, or for patients (including non-adult patients) presenting with specific complaints  
10  
11 146 where a suspected diagnosis has to be ruled-in or ruled-out. Presentations with one or more  
12  
13 147 missing values in any of the 28 laboratory test in the routine ED panel, were excluded.  
14  
15 148 Presentations with one or more extreme lab results, > 10 times standard deviation from the  
16  
17 149 median, were also excluded to minimize the effect on the estimation of regression  
18  
19 150 coefficients. The median was chosen as a measure of central tendency due to its resistance for  
20  
21 151 outliers. After the first case of COVID-19 in the Netherlands, all patients with symptoms of  
22  
23 152 COVID-19 (either fever and/or respiratory symptoms) were subjected to nasopharyngeal PCR  
24  
25 153 testing for SARS-CoV-2 RNA. PCR testing was performed by commercial tests that were  
26  
27 154 approved by the Dutch national institute of public health (RIVM). If a patient had a positive  
28  
29 155 PCR result in the past, subsequent presentations were excluded as re-presentations might be  
30  
31 156 clinically different from de novo presentations.  
32  
33  
34  
35  
36  
37  
38 157 The ED lab panel results were matched to SARS-CoV-2 PCR results if the underlying  
39  
40 158 nasopharyngeal swab had been taken  $\leq 1$  day prior, or  $\leq 1$  week after initial blood withdrawal  
41  
42 159 at the ED. If multiple PCR tests were performed in this window, and at least one PCR test was  
43  
44 160 positive, the presentation was labelled "*PCR-positive*". If all PCR test results in the time  
45  
46 161 window were negative, the presentation was labelled as "*PCR-negative*". If no PCR tests were  
47  
48 162 performed in the time window and the presentation occurred after the first case of COVID-19  
49  
50 163 in the Netherlands, the presentation was labelled as "*Untested*". All presentations before the  
51  
52 164 first case were labelled as "*Pre-COVID-19*".  
53  
54  
55  
56  
57  
58  
59  
60

## 166 *Laboratory tests*

167 The routine laboratory panel consisted of hemocytometric and chemical analyses. The  
168 hemocytometric tests were performed on Sysmex XN-10 instruments (Sysmex Corp., Kobe,  
169 Japan) and consisted of hemoglobin, hematocrit, erythrocytes, mean corpuscular volume  
170 (MCV), mean cellular hemoglobin (MCH), mean cellular hemoglobin concentration  
171 (MCHC), thrombocytes, leukocytes, neutrophils, eosinophils, basophils, lymphocytes and  
172 monocytes. The chemical analyses were performed on a Cobas 8000 Pro (Roche Dx, Basel,  
173 Switzerland) instrument and consisted of glucose, total bilirubin, aspartate aminotransferase  
174 (ASAT), alanine aminotransferase (ALAT), lactate dehydrogenase (LD), creatine kinase  
175 (CK), alkaline phosphatase (ALP), gamma-glutamyltransferase (gGT), blood urea nitrogen  
176 (BUN), creatinine, CKD-epi estimated glomerular filtration rate (eGFR), potassium, sodium,  
177 chloride, albumin (bromocresol green) and C-reactive protein (CRP). These results were  
178 combined with age and gender.

179

## 180 *Modelling*

181 All data were processed and analyzed in R version 4.1.1 [11]. Laboratory results, combined  
182 with age and gender were used as covariates in a regression model. Cases were defined as ED  
183 presentations labelled as “*PCR-positive*”, controls were all other presentations (i.e. “*PCR-*  
184 *negative*”, “*Untested*” or “*Pre-COVID-19*”). To achieve predictive accuracy, limit overfitting  
185 and perform feature selection, penalized logistic regression with an adaptive lasso penalty was  
186 chosen [12,13]. To minimize missing data, all non-numeric results at the extremes of the  
187 measuring range, were converted to numeric results by removing the “<” and “>” signs. For  
188 eGFR (CKD-epi) and CRP the raw precursor value was used instead of >90 ml/min/m<sup>2</sup> and  
189 <6 mg/L, respectively. Considering that laboratory results of bilirubin, ASAT, ALAT, LD,  
190 CK, ALP and gGT can have heavy (right) tailed distributions, which in turn impacts model

1  
2  
3 191 predictions, these variables were transformed logarithmically. More details regarding model  
4  
5 192 fitting can be found in the document, **Supplemental Material 1**. Models were fitted using the  
6  
7 193 glmnet-package [14].  
8  
9

10  
11 194

### 12 13 195 *CoLab-score*

14  
15  
16 196 Since this is a retrospective case-control study, the sample prevalence may not reflect the  
17  
18 197 true/current COVID-19 prevalence. To obtain well-calibrated probabilities the intercept term  
19  
20 198 in the model should be adjusted according to the current prevalence (details can be found in  
21  
22 199 the document, **Supplemental Material 1**) [15]. However, adjusting the intercept term is not  
23  
24 200 straightforward to implement in clinical practice, therefore the linear predictor of the model  
25  
26 201 was categorized into a score, this score is hereafter referred to as the “CoLab-score”. The  
27  
28 202 categorization is based on a number needed to test of 15 (i.e. one is willing to PCR test 15  
29  
30 203 patients to find one positive) and prevalence cut-points of 1%, 2%, 5%, 10% and 40% using  
31  
32 204 the intercept adjustment formula by King [15]. The intervals obtained through these breaks  
33  
34 205 correspond to CoLab-scores 5 to 0, respectively. Score 0 reflects low-risk for COVID-19 and  
35  
36 206 score 5 reflects high-risk. More details regarding the rationale of the CoLab-score  
37  
38 207 categorization can be found in the document, **Supplemental Material 1**.  
39  
40  
41  
42  
43

44 208

### 45 46 47 209 *Internal validation*

48  
49 210 To assess model performance while taking overfitting into account, bootstrapping was  
50  
51 211 performed. 1000 bootstrap samples were generated from the original data. On each bootstrap  
52  
53 212 sample, the full model fitting procedure and CoLab-score conversion were performed.  
54  
55 213 Optimism adjusted performance measures of the CoLab-score were obtained by applying the  
56  
57 214 0.632 bootstrap rule to the in-sample and out-of-bag-sample performance [16]. Performance  
58  
59  
60

1  
2  
3 215 measures included, AUC, sensitivity, specificity, positive predictive value (PPV) and negative  
4  
5 216 predictive value (NPV) of each CoLab-score. The pROC-package was used to calculate  
6  
7 217 performance measures [17]. Although the full inclusion period from July 2019 to July 2020  
8  
9 218 was used for model fitting, the performance was evaluated on the period starting from the first  
10  
11 219 COVID-19 infection (24<sup>th</sup> of February 2020) to July 2020. This was done to obtain  
12  
13 220 performance measures that would reflect real world performance.  
14  
15  
16  
17  
18 221

### 20 222 *Temporal validation*

23 223 For temporal validation, results from our center were prospectively analyzed from July 2020  
24  
25 224 to October 2021. During this period, the Netherlands was struck by a second wave of COVID-  
26  
27 225 19 infections, starting in the fall of 2020 and subsiding in the summer of 2021. In this period  
28  
29 226 there was also more widespread external PCR testing by municipal health services. The  
30  
31 227 results of external conducted PCR tests were not available to our study. To overcome this  
32  
33 228 limitation, the outcome in the temporal validation cohort was chosen as a composite of the  
34  
35 229 hospital registration of a confirmed COVID-19 infection and/or at least one positive PCR test  
36  
37 230 result. This period also covers both the emergence of new SARS-CoV-2 variants as well as  
38  
39 231 vaccine rollout. However, neither vaccination status nor genomic sequencing was available to  
40  
41 232 determine whether a patient was vaccinated or which variant caused the infection. Therefore,  
42  
43 233 data from the Dutch national institute of public health (RIVM) was used, to divide the  
44  
45 234 temporal validation period into three phases: i) from July 2020 until March 2021, no  
46  
47 235 vaccination and no variants of concern identified ii) from March 2021 until June 2021, partial  
48  
49 236 vaccination and B.1.1.7 (Alpha) variant identified as dominant iii) from June 2021 until  
50  
51 237 October 2021, widespread vaccination and B.1.617.2 (Delta) variant identified as dominant.  
52  
53 238 See **Supplemental Material 2 Figure 1** for more details. The temporal validation consisted  
54  
55 239 of assessing the AUC, sensitivity, specificity, PPV and NPV of each CoLab-score threshold  
56  
57  
58  
59  
60

1  
2  
3 240 for the entire period, as well as for each phase separately to determine a possible effect of  
4  
5 241 vaccination and new variants on performance (results in the **Supplemental Material 2**).  
6  
7 242 Model calibration was assessed graphically using the rms-package [18].  
8  
9

10 243

11  
12  
13 244 *External validation*

14  
15 245 For the external validation, several centers in the Netherlands were approached and assessed  
16  
17 246 if the required panel of laboratory tests and SARS-CoV-2 PCR test results were available.  
18  
19 247 Seven centers responded and three centers fulfilled the inclusion criteria: Gelre Hospitals  
20  
21 248 (center 1), Atalmedial Diagnostic Centers, location Alrijne Hospital Leiderdorp (center 2) and  
22  
23 249 Zuyderland Medical Center (center 3). The hematological parameters were measured with  
24  
25 250 Sysmex XN10/XN20 (center 1), CELL-DYN-Sapphire (Abbott Laboratories) (center 2) and  
26  
27 251 Sysmex XN10 instruments (center 3). The clinical chemistry parameters were measured with  
28  
29 252 Architect c14100/c160000 (Abbott Laboratories) (center 1), Architect ci4100 (Abbott  
30  
31 253 Laboratories) (center 2) and Cobas 8000 instruments (Roche Dx) (center 3). The external  
32  
33 254 validation was similar to the temporal validation and consisted of assessing the AUC  
34  
35 255 sensitivity, specificity, PPV and NPV of each CoLab-score threshold. Calibration was  
36  
37 256 assessed graphically analogous to the temporal validation dataset.  
38  
39  
40  
41  
42  
43  
44  
45  
46  
47  
48  
49  
50  
51  
52  
53  
54  
55  
56  
57  
58  
59  
60

## 257 Results

### 258 Development dataset

259 12879 emergency department (ED) presentations of 10327 patients from July 2019 to July  
 260 2020 were included. After excluding cases with an incomplete lab panel, patient presentations  
 261 that occurred after a positive PCR test in the past (re-presentations) and presentations with  
 262 extreme values (>10 times standard deviation) in any of the lab results, 10417 presentations of  
 263 8610 patients remained (**Figure 1 A**).

|                      | <b>Pre-COVID<br/>N = 5890</b> | <b>Untested<br/>N = 3303</b> | <b>PCR negative<br/>N = 945</b> | <b>PCR positive<br/>N = 279</b> |
|----------------------|-------------------------------|------------------------------|---------------------------------|---------------------------------|
| Age in years         | 61 (21)                       | 60 (21)                      | 66 (18)                         | 69 (15)                         |
| Female gender        | 2909 (49.4 %)                 | 1659 (50.2 %)                | 466 (49.3 %)                    | 95 (34.1 %)                     |
| Specialism           |                               |                              |                                 |                                 |
| Internal medicine    | 1648 (28.0 %)                 | 896 (27.1 %)                 | 244 (25.8 %)                    | 71 (25.4 %)                     |
| Surgery              | 1007 (17.1 %)                 | 679 (20.6 %)                 | 51 (5.4 %)                      | 5 (1.8 %)                       |
| Neurology            | 775 (13.2 %)                  | 468 (14.2 %)                 | 64 (6.8 %)                      | 5 (1.8 %)                       |
| Pulmonary medicine   | 714 (12.1 %)                  | 220 (6.7 %)                  | 326 (34.5 %)                    | 167 (59.9 %)                    |
| Cardiology           | 560 (9.5 %)                   | 322 (9.7 %)                  | 145 (15.3 %)                    | 6 (2.2 %)                       |
| Urology              | 309 (5.2 %)                   | 148 (4.5 %)                  | 15 (1.6 %)                      | 7 (2.5 %)                       |
| Gastroenterology     | 306 (5.2 %)                   | 224 (6.8 %)                  | 27 (2.9 %)                      | 1 (0.4 %)                       |
| Geriatrics           | 189 (3.2 %)                   | 95 (2.9 %)                   | 52 (5.5 %)                      | 15 (5.4 %)                      |
| Orthopedics          | 147 (2.5 %)                   | 109 (3.3 %)                  | 11 (1.2 %)                      | 0 (0.0 %)                       |
| Gynecology           | 118 (2.0 %)                   | 82 (2.5 %)                   | 2 (0.2 %)                       | 0 (0.0 %)                       |
| Other                | 117 (2.0 %)                   | 60 (1.8 %)                   | 8 (0.8 %)                       | 2 (0.7 %)                       |
| Hemoglobin in mmol/L | 8.2 (1.3)                     | 8.3 (1.3)                    | 8.2 (1.4)                       | 8.6 (1.1)                       |
| Hematocrit in L/L    | 0.403 (0.059)                 | 0.405 (0.056)                | 0.405 (0.062)                   | 0.417 (0.047)                   |
| Erythrocytes in /pL  | 4.41 (0.69)                   | 4.43 (0.66)                  | 4.41 (0.72)                     | 4.61 (0.60)                     |
| MCV in fl            | 91.8 (6.4)                    | 91.9 (6.1)                   | 92.4 (6.7)                      | 90.7 (5.5)                      |
| MCH in mmol          | 1.859 (0.157)                 | 1.876 (0.150)                | 1.874 (0.172)                   | 1.869 (0.141)                   |
| MCHC in mmol/L       | 20.2 (0.9)                    | 20.4 (0.9)                   | 20.3 (1.0)                      | 20.6 (0.8)                      |
| Thrombocytes in /nL  | 263 (99)                      | 266 (100)                    | 269 (105)                       | 217 (123)                       |
| Leukocytes in /nL    | 9.30 [7.06, 12.16]            | 8.92 [7.01, 11.89]           | 9.66 [7.17, 12.94]              | 6.33 [4.74, 8.48]               |
| Neutrophils in /nL   | 6.62 [4.51, 9.53]             | 6.10 [4.42, 8.94]            | 7.01 [4.79, 10.02]              | 4.71 [3.30, 6.94]               |
| Eosinophils in /nL   | 0.09 [0.03, 0.17]             | 0.09 [0.03, 0.18]            | 0.08 [0.02, 0.17]               | 0.00 [0.00, 0.02]               |
| Basophils in /nL     | 0.04 [0.02, 0.05]             | 0.04 [0.02, 0.05]            | 0.04 [0.02, 0.05]               | 0.01 [0.01, 0.02]               |
| Lymphocytes in /nL   | 1.47 [0.93, 2.13]             | 1.56 [1.05, 2.18]            | 1.31 [0.80, 2.03]               | 0.86 [0.59, 1.21]               |
| Monocytes in /nL     | 0.70 [0.52, 0.93]             | 0.69 [0.52, 0.91]            | 0.74 [0.54, 1.01]               | 0.45 [0.32, 0.64]               |
| Glucose in mmol/L    | 6.76 [5.83, 8.39]             | 6.68 [5.76, 8.14]            | 6.98 [5.95, 8.85]               | 6.77 [5.98, 8.48]               |
| Bilirubin in umol/L  | 7.5 [5.0, 11.6]               | 7.4 [5.1, 10.9]              | 8.3 [5.6, 12.4]                 | 8.2 [6.3, 11.4]                 |
| ASAT in U/L          | 24.0 [19.1, 32.2]             | 26.5 [21.6, 35.1]            | 27.7 [21.7, 39.2]               | 40.7 [30.2, 57.2]               |
| ALAT in U/L          | 24.3 [17.8, 35.3]             | 25.3 [18.4, 36.2]            | 25.7 [18.4, 40.0]               | 33.7 [23.3, 50.0]               |
| LD in U/L            | 201 [173, 240]                | 198 [170, 236]               | 215 [178, 263]                  | 300 [238, 403]                  |
| CK in U/L            | 82 [51, 134]                  | 83 [52, 136]                 | 76 [51, 125]                    | 124 [62, 222]                   |
| ALP in IU/L          | 83.0 [68.0, 105.0]            | 81.0 [65.8, 102.5]           | 86.9 [67.9, 110.0]              | 71.0 [58.8, 85.0]               |
| gGT in U/L           | 27.0 [17.0, 53.0]             | 28.4 [18.4, 50.5]            | 37.0 [22.4, 68.9]               | 42.0 [28.0, 83.5]               |
| BUN in mmol/L        | 5.7 [4.3, 8.0]                | 5.8 [4.3, 7.8]               | 6.2 [4.6, 9.4]                  | 6.1 [4.7, 8.9]                  |

|                                  |                   |                    |                   |                   |
|----------------------------------|-------------------|--------------------|-------------------|-------------------|
| CKD-epi in ml/min/m <sup>2</sup> | 80.9 [58.0, 99.1] | 85.0 [63.5, 103.3] | 79.1 [52.1, 96.6] | 76.6 [54.9, 91.2] |
| Potassium in mmol/L              | 4.06 (0.50)       | 4.03 (0.49)        | 4.07 (0.55)       | 3.91 (0.47)       |
| Sodium in mmol/L                 | 139.2 (4.0)       | 138.5 (3.9)        | 138.0 (4.3)       | 136.4 (4.1)       |
| Chloride in mmol/L               | 104.4 (4.6)       | 103.8 (4.5)        | 102.9 (4.8)       | 101.6 (4.4)       |
| Albumin in g/L                   | 42.4 (4.9)        | 42.3 (4.5)         | 40.8 (4.8)        | 38.4 (3.8)        |
| CRP in mg/L                      | 8 [2, 41]         | 5 [1, 30]          | 18 [3, 69]        | 77 [37, 136]      |

264

265 **Table 1: Descriptive statistics of development dataset and laboratory concentrations.**

266 *Shown are the laboratory tests routinely requested at ED presentation and their mean/median*  
 267 *results (in the development dataset) for the presentations before the first COVID-19 patient in*  
 268 *the Netherlands (“Pre-COVID-19”), presentations thereafter that were not tested for*  
 269 *COVID-19 (“Untested”), tested negatively (“PCR negative”) and tested positive (“PCR*  
 270 *positive”). For results with normal distributions, the mean value and standard deviation (in*  
 271 *round brackets) are shown. For results that have skewed or heavy tailed distributions, the*  
 272 *median value and the interquartile range is shown [in squared brackets]. Dark grey marked*  
 273 *figures indicate a clinically relevant difference from the Pre-COVID-19 category (based on*  
 274 *the total allowable error).*

275

276 Descriptive statistics of ED presentations are shown in **Table 1**, dark grey marked figures  
 277 indicate a clinically relevant difference from the Pre-COVID-19 category (based on the total  
 278 allowable error [19]). For the PCR positives (N = 279), 91% (95% CI: 88 to 94%) of the cases  
 279 were tested positive in their first PCR. The remaining 24 patients were positive in their second  
 280 (N = 18), third (N = 5) or fourth (N = 1) PCR.

281

282 **CoLab-score**

283 The model obtained through adaptive lasso regression contained eleven variables, which are  
 284 depicted with their regression coefficients (weights) in **Table 2**.

| Variable                                      | $\beta$  | Exclusion limit            | Relative importance |
|-----------------------------------------------|----------|----------------------------|---------------------|
| Intercept                                     | -6.885   |                            | -                   |
| Erythrocytes /pL                              | 0.9379   | Erythrocytes < 2.9 /pL     | 52 %                |
| Leukocytes /nL                                | -0.1298  |                            | 46 %                |
| Eosinophils /nL                               | -6.834   |                            | 86 %                |
| Basophils /nL                                 | -47.70   | Basophils >0.33 /nL        | 100 %               |
| log <sub>10</sub> of Bilirubin in $\mu$ mol/L | -1.142   | Bilirubin >169 $\mu$ mol/L | 26 %                |
| log <sub>10</sub> of LD in U/L                | 5.369    | LD >1564 U/L               | 58 %                |
| log <sub>10</sub> of ALP in IU/L              | -3.114   | AF >1000 IU/L              | 45 %                |
| log <sub>10</sub> of gGT in U/L               | 0.3605   | gGT >1611 U/L              | 11 %                |
| Albumin in g/L                                | -0.1156  |                            | 45 %                |
| CRP in mg/L                                   | 0.002560 |                            | 15 %                |
| Age in years                                  | 0.002275 |                            | 4 %                 |

285

### 286 Table 2: Calculation of the CoLab-linear predictor (LP).

287 *The CoLab-linear predictor (LP) is calculated by summing the intercept and the products of*

288 *the 11 variables with their corresponding coefficients ( $\beta$ 's). CoLab-LP = - 6.885 +*

289 *[erythrocytes]  $\times$  0.9379 - [leukocytes]  $\times$  0.1298 - [eosinophils]  $\times$  6.834 - [basophils]  $\times$*

290 *47.7 - log<sub>10</sub>([bilirubin])  $\times$  1.142 + log<sub>10</sub>([LD])  $\times$  5.369 - log<sub>10</sub>([ALP])  $\times$  3.114 +*

291 *log<sub>10</sub>([gGT])  $\times$  0.3605 - [albumin]  $\times$  0.1156 + [CRP]  $\times$  0.02560 + [age]  $\times$  0.002275. The*

292 *LP can be converted into a CoLab-score (see Figure 2) or into a probability if the prevalence*

293 *is known or estimated (see details in Supplemental Material 1). The CoLab-score is not valid*

294 *if any of the variables exceed the limits in the third column. The relative importance ranks the*

295 *importance of variables in predicting the outcome, relative to the most important variable (in*

296 *this case basophils).*

297

298 A larger  $\beta$ -coefficient does not imply that a variable is more important in predicting the odds

299 of testing positive for SARS-CoV-2, since variables are on different scales. The most

300 important variables are basophiles, eosinophils and lactate dehydrogenase (LD).



As shown in **Figure 2**, the linear predictor clearly discriminates between COVID-19 and non-COVID-19. The linear predictor is converted to CoLab-scores 0 – 5 with the cut-points depicted in **Figure 2**.

### Internal validation

The model was validated in the period starting from the first COVID-19 infection to July 2020, in this period the mean prevalence was 7.2%. The AUC of the CoLab-score is 0.930 (95% CI: 0.909 to 0.945).

| CoLab-score | Sensitivity              | Specificity              | PPV                      | NPV                      | TP                 | TN                    | FP                   | FN              | % of population |
|-------------|--------------------------|--------------------------|--------------------------|--------------------------|--------------------|-----------------------|----------------------|-----------------|-----------------|
| 0           | 0.984<br>(0.969 - 0.991) | 0.410<br>(0.303 - 0.542) | 0.115<br>(0.094 - 0.147) | 0.997<br>(0.993 - 0.999) | 133<br>(165 - 195) | 485<br>(876 - 1360)   | 799<br>(1280 - 1660) | 0<br>(2 - 6)    | 28<br>(38 - 51) |
| ≤ 1         | 0.912<br>(0.892 - 0.952) | 0.785<br>(0.741 - 0.827) | 0.248<br>(0.208 - 0.300) | 0.991<br>(0.989 - 0.995) | 126<br>(152 - 185) | 1520<br>(1690 - 1850) | 314<br>(464 - 627)   | 4<br>(15 - 21)  | 69<br>(73 - 77) |
| ≤ 2         | 0.856<br>(0.816 - 0.894) | 0.880<br>(0.864 - 0.900) | 0.357<br>(0.316 - 0.415) | 0.988<br>(0.984 - 0.991) | 114<br>(143 - 173) | 1800<br>(1900 - 2010) | 187<br>(259 - 317)   | 12<br>(24 - 36) | 81<br>(83 - 84) |
| ≤ 3         | 0.757<br>(0.706 - 0.809) | 0.951<br>(0.945 - 0.959) | 0.546<br>(0.496 - 0.603) | 0.981<br>(0.976 - 0.985) | 99<br>(127 - 157)  | 1960<br>(2050 - 2150) | 77<br>(105 - 130)    | 24<br>(40 - 57) | 89<br>(90 - 91) |
| ≤ 4         | 0.612<br>(0.530 - 0.706) | 0.978<br>(0.972 - 0.983) | 0.683<br>(0.628 - 0.746) | 0.970<br>(0.963 - 0.978) | 74<br>(103 - 137)  | 2010<br>(2110 - 2210) | 29<br>(48 - 69)      | 35<br>(64 - 90) | 92<br>(94 - 94) |

309

### Table 3: Diagnostic performance CoLab-score in the development dataset.

The development dataset was internally validation for the period March 2020 – July 2020 ( $N = 4.527$ ). Sensitivities, specificities, positive predictive values (PPV), negative predictive values (NPV), true positives (TP), true negatives (TN), false positives (FP) and false negatives (FN) and fraction of presentations (%) are shown for fixed cut-offs (CoLab-score 0 till ≤ 4). The numbers in round brackets represent the 95% optimism adjusted bootstrapped confidence intervals. The first column defines the threshold above which CoLab-score a patient is

1  
2  
3 317 *considered positive. Note that “0” lists the sensitivity and NPV of CoLab-score 0 and “ $\leq 4$ ”*  
4  
5 318 *lists the specificity and PPV of CoLab-score 5.*

6  
7  
8 319  
9  
10  
11 320 Diagnostic performance is shown in **Table 3**. A CoLab-score of 0 has a negative predictive  
12  
13 321 value (NPV) of 0.997 (95% CI: 0.994 to 0.999) and positive predictive value (PPV) of 0.115  
14  
15 322 (0.0932 - 0.141), one third (38.4%, 95% CI: 26.4 to 48.4%) of all ED presentations were  
16  
17 323 assigned this score and can therefore be safely excluded. Conversely, 6.2% (95% CI: 6.3 to  
18  
19 324 7.2%) of the ED patients had a CoLab-score = 5. Given the PPV of this score (0.682, 95% CI:  
20  
21 325 0.622 to 0.740, NPV: 0.970, 95% CI: 0.962 - 0.977), subsequent PCR testing is advised.  
22  
23  
24  
25  
26 326

### 27 28 327 *Temporal validation*

29  
30 328 As the CoLab-score was developed in our center after the first COVID-19-wave in the  
31  
32 329 Netherlands, the performance was evaluated in our center from July 2020 until October 2021.  
33  
34 330 Lab results from 17489 ED presentations were collected. After applying the inclusion flow as  
35  
36 331 shown in **Figure 1 B**, 14080 presentations remained, of which 1039 were associated with a  
37  
38 332 COVID-19 infection.

39  
40  
41  
42  
43 333 The mean prevalence in this period was 7.4%. The AUC of the CoLab-score in the temporal  
44  
45 334 validation set is 0.916 (95% CI: 0.906 to 0.927). The performance is comparable to the  
46  
47 335 development cohort, although sensitivity is slightly lower and specificity slightly higher (cf.  
48  
49 336 **Table 3** and **Table 4**). The temporal validation dataset was also split into three phases  
50  
51 337 according to dominant SARS-CoV-2 variants and vaccine roll-out (see **Supplemental**  
52  
53 338 **Material 2 Figure 1**). The discriminative ability was not lower in the second or third phase,  
54  
55 339 compared to the first phase. Diagnostic performance is preserved in terms of sensitivity and  
56  
57 340 specificity, except a moderately reduced sensitivity of scores  $\geq 3$  in the third phase as

1  
2  
3 341 compared to the first phase. PPV and NPV are incomparable due to different prevalence/pre-  
4  
5 342 test probabilities in each phase (see **Supplemental Material 2 Table 1**).

7  
8 343 In terms of the predicted probabilities, model calibration shows that overall predicted  
9  
10 344 probabilities are too low (see **Supplemental Material 3** for the calibration plot), which is  
11  
12 345 expected since the prevalence differs and the intercept has to be adjusted to the prevalence.

13 346 In this period at least 22 COVID-19 positive patients were identified by the CoLab-score, that  
14  
15 347 initially did not present with COVID-specific symptoms. Most patients had neurological or  
16  
17 348 orthopedic presenting symptoms.

18  
19  
20  
21  
22  
23 349

### 24 25 350 *External validation*

26  
27 351 For external validation, data obtained from three other centers were used, center 1 (N = 1284,  
28  
29 352 52 COVID-19 positive), center 2 (N = 2899, 99 COVID-19 positive) and center 3 (N = 3545,  
30  
31 353 336 COVID-19 positive). The inclusion flow is summarized in **Figure 3**. COVID-19  
32  
33 354 prevalence differed between the three centers (4.0%, 3.4% and 9.5% respectively) and was  
34  
35 355 lower in centers 1 and 2, and higher in center 3 than in the development dataset. The AUCs of  
36  
37 356 the CoLab-score are 0.904 (95% CI: 0.866 to 0.942), 0.886 (95% CI: 0.851 - 0.922) and 0.891  
38  
39 357 (95% CI: 0.872 - 0.909), for centers 1, 2, and 3 respectively.

40  
41  
42 358 Diagnostic performance is shown in **Table 4**. The sensitivity of CoLab-score 0 in all centers  
43  
44 359 is  $\geq 0.96$ . Therefore, the NPV of CoLab-score 0 was more than 99%. Calibration plots for  
45  
46 360 external centers are shown in **Supplemental Material 3**, the observed fraction of COVID-19  
47  
48 361 positives is slightly lower than expected in centers 1 and 2. For center 3, low probabilities  
49  
50 362 appear slightly underestimated and high probabilities slightly overestimated.

| CoLab-score | Validation set | Sensitivity              | Specificity              | PPV                      | NPV                      | TP                   | TN                       | FP                    | FN                 |
|-------------|----------------|--------------------------|--------------------------|--------------------------|--------------------------|----------------------|--------------------------|-----------------------|--------------------|
| 0           | Temporal       | 0.967<br>(0.956 - 0.978) | 0.420<br>(0.411 - 0.428) | 0.117<br>(0.115 - 0.119) | 0.994<br>(0.992 - 0.996) | 1005<br>(993 - 1016) | 5476<br>(5366 - 5587)    | 7565<br>(7454 - 7675) | 34<br>(23 - 46)    |
|             | Center 1       | 1.000<br>(1.000 - 1.000) | 0.331<br>(0.307 - 0.358) | 0.059<br>(0.057 - 0.061) | 1.000<br>(1.000 - 1.000) | 52<br>(52 - 52)      | 410<br>(380 - 443)       | 827<br>(794 - 857)    | 0<br>(0 - 0)       |
|             | Center 2       | 0.961<br>(0.922 - 0.990) | 0.351<br>(0.333 - 0.369) | 0.052<br>(0.049 - 0.054) | 0.996<br>(0.992 - 0.999) | 99<br>(95 - 102)     | 985<br>(935 - 1035)      | 1823<br>(1773 - 1873) | 4<br>(1 - 8)       |
|             | Center 3       | 0.970<br>(0.950 - 0.988) | 0.322<br>(0.306 - 0.338) | 0.130<br>(0.126 - 0.133) | 0.991<br>(0.984 - 0.996) | 327<br>(320 - 333)   | 1042<br>(991 - 1092)     | 2193<br>(2143 - 2244) | 10<br>(4 - 17)     |
|             | Temporal       | 0.888<br>(0.870 - 0.908) | 0.791<br>(0.783 - 0.798) | 0.253<br>(0.245 - 0.261) | 0.989<br>(0.987 - 0.991) | 923<br>(904 - 943)   | 10311<br>(10215 - 10401) | 2730<br>(2640 - 2826) | 116<br>(96 - 135)  |
|             | Center 1       | 0.923<br>(0.846 - 0.981) | 0.694<br>(0.669 - 0.720) | 0.113<br>(0.101 - 0.124) | 0.995<br>(0.991 - 0.999) | 48<br>(44 - 51)      | 858<br>(828 - 891)       | 379<br>(346 - 409)    | 4<br>(1 - 8)       |
| $\leq 1$    | Center 2       | 0.913<br>(0.854 - 0.961) | 0.678<br>(0.661 - 0.696) | 0.094<br>(0.087 - 0.101) | 0.995<br>(0.992 - 0.998) | 94<br>(88 - 99)      | 1905<br>(1857 - 1953)    | 903<br>(855 - 951)    | 9<br>(4 - 15)      |
|             | Center 3       | 0.914<br>(0.881 - 0.944) | 0.674<br>(0.657 - 0.691) | 0.226<br>(0.216 - 0.236) | 0.987<br>(0.982 - 0.991) | 308<br>(297 - 318)   | 2180<br>(2126 - 2234)    | 1055<br>(1001 - 1109) | 29<br>(19 - 40)    |
|             | Temporal       | 0.820<br>(0.796 - 0.843) | 0.894<br>(0.889 - 0.899) | 0.382<br>(0.367 - 0.396) | 0.984<br>(0.982 - 0.986) | 852<br>(827 - 876)   | 11661<br>(11591 - 11729) | 1380<br>(1312 - 1450) | 187<br>(163 - 212) |
|             | Center 1       | 0.808<br>(0.692 - 0.904) | 0.811<br>(0.788 - 0.832) | 0.152<br>(0.129 - 0.176) | 0.990<br>(0.984 - 0.995) | 42<br>(36 - 47)      | 1003<br>(975 - 1029)     | 234<br>(208 - 262)    | 10<br>(5 - 16)     |
|             | Center 2       | 0.845<br>(0.777 - 0.913) | 0.801<br>(0.785 - 0.815) | 0.135<br>(0.122 - 0.147) | 0.993<br>(0.990 - 0.996) | 87<br>(80 - 94)      | 2248<br>(2205 - 2289)    | 560<br>(519 - 603)    | 16<br>(9 - 23)     |
|             | Center 3       | 0.890<br>(0.855 - 0.923) | 0.794<br>(0.779 - 0.808) | 0.311<br>(0.294 - 0.328) | 0.986<br>(0.981 - 0.990) | 300<br>(288 - 311)   | 2569<br>(2521 - 2615)    | 666<br>(620 - 714)    | 37<br>(26 - 49)    |
| $\leq 2$    | Temporal       | 0.710<br>(0.682 - 0.738) | 0.962<br>(0.958 - 0.965) | 0.596<br>(0.573 - 0.618) | 0.977<br>(0.974 - 0.979) | 738<br>(709 - 767)   | 12540<br>(12496 - 12582) | 501<br>(459 - 545)    | 301<br>(272 - 330) |
|             | Center 1       | 0.750<br>(0.635 - 0.865) | 0.909<br>(0.892 - 0.925) | 0.257<br>(0.213 - 0.306) | 0.989<br>(0.983 - 0.994) | 39<br>(33 - 45)      | 1124<br>(1104 - 1144)    | 113<br>(93 - 133)     | 13<br>(7 - 19)     |
|             | Center 2       | 0.660<br>(0.563 - 0.748) | 0.897<br>(0.885 - 0.908) | 0.190<br>(0.163 - 0.218) | 0.986<br>(0.983 - 0.990) | 68<br>(58 - 77)      | 2519<br>(2486 - 2549)    | 289<br>(259 - 322)    | 35<br>(26 - 45)    |
|             | Center 3       | 0.766<br>(0.718 - 0.810) | 0.887<br>(0.876 - 0.898) | 0.413<br>(0.386 - 0.442) | 0.973<br>(0.968 - 0.978) | 258<br>(242 - 273)   | 2869<br>(2835 - 2905)    | 366<br>(330 - 400)    | 79<br>(64 - 95)    |
|             | Temporal       | 0.585<br>(0.556 - 0.615) | 0.984<br>(0.982 - 0.987) | 0.750<br>(0.724 - 0.778) | 0.968<br>(0.965 - 0.970) | 608<br>(578 - 639)   | 12838<br>(12811 - 12866) | 203<br>(175 - 230)    | 431<br>(400 - 461) |
|             | Center 1       | 0.750<br>(0.635 - 0.865) | 0.909<br>(0.892 - 0.925) | 0.257<br>(0.213 - 0.306) | 0.989<br>(0.983 - 0.994) | 39<br>(33 - 45)      | 1124<br>(1104 - 1144)    | 113<br>(93 - 133)     | 13<br>(7 - 19)     |

| CoLab-score | Validation set | Sensitivity              | Specificity              | PPV                      | NPV                      | TP                 | TN                    | FP                 | FN                |
|-------------|----------------|--------------------------|--------------------------|--------------------------|--------------------------|--------------------|-----------------------|--------------------|-------------------|
|             | Center 1       | 0.654<br>(0.519 - 0.788) | 0.951<br>(0.939 - 0.962) | 0.359<br>(0.293 - 0.435) | 0.985<br>(0.979 - 0.991) | 34<br>(27 - 41)    | 1176<br>(1161 - 1190) | 61<br>(47 - 76)    | 18<br>(11 - 25)   |
|             | Center 2       | 0.534<br>(0.437 - 0.621) | 0.952<br>(0.943 - 0.959) | 0.287<br>(0.239 - 0.339) | 0.982<br>(0.979 - 0.986) | 55<br>(45 - 64)    | 2672<br>(2649 - 2693) | 136<br>(115 - 159) | 48<br>(39 - 58)   |
|             | Center 3       | 0.665<br>(0.611 - 0.718) | 0.930<br>(0.921 - 0.938) | 0.497<br>(0.462 - 0.534) | 0.964<br>(0.958 - 0.969) | 224<br>(206 - 242) | 3008<br>(2980 - 3036) | 227<br>(199 - 255) | 113<br>(95 - 131) |

363

364 **Table 4: Diagnostic performance of the CoLab-score in the validation dataset (temporal)**  
 365 **and three external hospitals.**

366 *Sensitivities, specificities, positive predictive values (PPV), negative predictive values (NPV),*  
 367 *true positives (TP), true negatives (TN), false positives (FP) and false negatives (FN) are*  
 368 *shown for fixed cut-offs (CoLab-score 0 till  $\leq 4$ ) with bootstrapped 95% confidence intervals*  
 369 *in parentheses. Note that “0” lists the sensitivity and NPV of CoLab-score 0 and “ $\leq 4$ ” lists*  
 370 *the specificity and PPV of CoLab-score 5.*

## 371 Discussion

372 Given the impact of COVID-19 on society and healthcare, there is a need for simple and fast  
373 detection of patients with a possible COVID-19 infection in the ED. The CoLab-score  
374 described in this study, is a fast and accurate risk score to triage patients presenting at the ED  
375 based on ten routine blood biomarkers and age.

376 The main strength of this study is that this score can be used as an early-warning or triaging  
377 tool for the ED population presenting with abdominal pain, chest pain, shortness of breath,  
378 syncope, sepsis or other non-specific complaints where a routine blood panel is requested.  
379 This is in contrast to the vast majority of COVID-19 diagnostic models that have been  
380 developed on a pre-selected population of PCR-tested patients [9,20–26]. Moreover, the  
381 CoLab-score requires only routine blood tests, instead of (features from) imaging such as CT-  
382 scans or laboratory tests that are not routinely collected in the ED, e.g. interleukin-6 or 3-  
383 hydroxybuteric acid [4]. Compared to lateral flow tests (LFTs), which provide a dichotomous  
384 result within 30 minutes and are widely adopted in EDs, the CoLab-score is a continuous  
385 score. The lowest CoLab-scores (0 - 1) offer higher sensitivity and are therefore more suitable  
386 to rule-out COVID-19 than a LFT, which are only moderately sensitive (albeit more specific)  
387 [27,28].

388 Two other studies have been published which are similar to this study [9,10]. Interestingly,  
389 the study by Soltan et al., ranked basophils and eosinophils as the two most important features  
390 in predicting the outcome, similar to our results [10]. Eosinophils were also seen as one of the  
391 most important features by Plante et al. [9]. However, both studies focus on an artificial  
392 intelligence/machine learning approach. While their approach likely results in higher  
393 predictive performance due to the ability of machine learning models to capture non-linear  
394 and interaction effects, the goal of this study was to develop a simple, fast and robust model  
395 that can easily be implemented in current hospital IT systems.

1  
2  
3 396 Since this is a retrospective case-control study, there is some unavoidable missing data. In our  
4  
5 397 cohort 17.6% of the ED presentations could not be used due to one or more missing  
6  
7 398 laboratory results. This is lower or equal to similar studies; 22% [23], 17% [21] and 11% [26].  
9  
10 399 Important to note is that 7.7% of missingness is due to analytical errors which can be assumed  
11  
12 400 to be missing completely at random. For the remaining 9.9% of missingness, the full lab panel  
13  
14 401 was most frequently missing for pediatric, obstetric and surgery patients. These patients are  
15  
16 402 presenting with specific complaints for which specific laboratory tests are requested, and  
17  
18 403 hence do not match the inclusion criteria for a routine blood panel. Overall the missingness  
19  
20 404 was significantly lower in the PCR-tested group versus the untested group ( $\chi^2$ -test p-value  
21  
22 405 <0.001).

23  
24  
25  
26 406 In the external centers, there is a high level of missingness as a result of an incomplete  
27  
28 407 laboratory panel. In the case of centers 1 and 2, only internal medicine ED presentations were  
29  
30 408 tested with a laboratory panel containing the 10 tests required for the CoLab-score. The ED  
31  
32 409 lab panel of other disciplines (e.g. urology, surgery or pediatrics) differed and did not contain  
33  
34 410 the required tests. Nevertheless, the majority of COVID-19 patients were internal medicine  
35  
36 411 ED presentations, which is reflected by the few PCR-positive patients excluded. Due to these  
37  
38 412 high levels of missingness, the results of the external centers cannot be used to show that the  
39  
40 413 CoLab-score generalizes to the entire ED population. Rather, the results show that for the  
41  
42 414 majority of COVID-19 positive patients presenting at the ED, a routine laboratory panel is  
43  
44 415 available from which the CoLab-score can be calculated, and that the performance of the  
45  
46 416 CoLab-score in this population is comparable to the development population.

47  
48  
49  
50  
51  
52 417 The performance of the CoLab-score is affected by the time between the onset of symptoms  
53  
54 418 and ED presentations. The score increases with the duration of symptoms and gradually  
55  
56 419 decreases after day 7 (see **Supplemental Material 4 Figure 1** for a plot of the duration of  
57  
58 420 COVID-19 related symptoms and the CoLab-linear predictor). As a consequence, some

1  
2  
3 421 COVID-19 patients with early or late presentation after onset of symptoms can be missed.  
4  
5 422 Optimal performance of the CoLab-score is achieved when the onset of symptoms is >1 and  
6  
7 423 <10 days prior to ED presentation. Chemotherapy that causes myeloid suppression, will  
8  
9 424 decrease neutrophilic, basophilic and eosinophilic counts and thereby “falsely” increasing the  
10  
11 425 CoLab-score. Conversely, COVID-19 patients with severe anemia could have “falsely”  
12  
13 426 lowered CoLab-scores. To minimize false negatives, we have therefore advised to report  
14  
15 427 CoLab-scores only when the concentration of erythrocytes is  $\geq 2.9$  /pL.  
16  
17  
18  
19 428 It was chosen to exclude re-presentations after a previous presentation with COVID-19. Since  
20  
21 429 the median time between initial presentation and re-presentation was 12 days, these patients  
22  
23 430 were most likely not re-infected patients, but patients who deteriorated after initial  
24  
25 431 presentation/treatment. Given that the CoLab-score follows the host-immune response, the  
26  
27 432 score is time sensitive (see **Supplemental Material 4 Figure 1**). Including these patients  
28  
29 433 would impact the performance of the CoLab-score as patients in a later phase of the disease  
30  
31 434 show different biomarker profiles. The CoLab-score is aimed towards alerting clinicians to  
32  
33 435 patients presenting with a novel SARS-CoV-2 infection, rather than patients who deteriorate  
34  
35 436 after treatment for COVID-19. Other re-presentations were not excluded, which results in  
36  
37 437 some patients appearing multiple times in a dataset. This was not corrected for in the  
38  
39 438 regression model since the assumption was made that ED presentations are independent  
40  
41 439 observations. The median time between re-presentations is 38 days, most likely resulting in  
42  
43 440 variations in laboratory results between presentations, and hence, little to no correlation  
44  
45 441 between presentations. A sensitivity analysis was performed whereby only the first  
46  
47 442 presentation was included for each patient (**Supplemental Material 4 Table 1**), but no  
48  
49 443 difference was found in performance in terms of sensitivity, specificity and AUC.  
50  
51  
52  
53  
54 444 The CoLab-score does not serve as a replacement for PCR-testing or LFTs, and can be used to  
55  
56 445 guide PCR-testing when routine blood tests are available. Note the performance of the  
57  
58  
59  
60



1  
2  
3 446 CoLab-score in a suspected/PCR-tested cohort is not equal to the (see **Supplemental**  
4  
5 447 **Material 4 Table 1**).

6  
7  
8 448 Finally, the CoLab-score could lead to false positives by other viral infections. However, in an  
9  
10 449 historic patient cohort, the CoLab-score had only limited discriminative ability in separating  
11  
12 450 influenza-PCR-negative from influenza-PCR-positive patients (see **Supplemental Material 4**  
13  
14 451 **Figure 2**) implying specificity for SARS-CoV-2. Since the CoLab-score reflects the host-  
15  
16 452 response to the virus, it is expected that the CoLab-score is also sensitive to future SARS-  
17  
18 453 CoV-2 variants. This is supported by the fact that the diagnostic performance is sustained in  
19  
20 454 periods with different dominant variants. Moreover, there is no evidence that the  
21  
22 455 discriminative ability of the CoLab-score is lowered by a change in the ED patient population  
23  
24 456 as a result of widespread vaccination. Although vaccination status is not registered for all  
25  
26 457 presenting patients, in a small subgroup of 12 patients for whom vaccination status was  
27  
28 458 registered, and were COVID-19 positive, 8 of 12 patients had the highest CoLab-score (= 5)  
29  
30 459 (see **Supplemental Material 2 Figure 2**),

31  
32  
33  
34  
35  
36 460 To conclude, the CoLab-score developed and validated in this study, based on 10 routine  
37  
38 461 laboratory results and age, is available within 1 hour for any patient presenting at the ED. The  
39  
40 462 score can be used by clinicians to guide PCR testing or triage patients and helps to identify  
41  
42 463 COVID-19 in patients presenting at the ED with abdominal pain, chest pain, shortness of  
43  
44 464 breath, syncope, sepsis or other non-specific complaints where a routine blood panel is  
45  
46 465 requested. The lowest CoLab-score can be used to effectively rule-out a possible SARS-CoV-  
47  
48 466 2 infection, the highest score to alert physicians to a possible infection. The CoLab-score is  
49  
50 467 therefore a valuable tool to rule out COVID-19, guide PCR testing and is available to any  
51  
52 468 center with access to routine laboratory tests.

53  
54  
55  
56  
57  
58 469

## 470 **Funding statement**

471 This was an investigator-initiated study and no funding was received for this study.

472

## 473 **Competing interests**

474 A-KB reports no conflict of interest. RD reports no conflict of interest. MM reports no  
475 conflict of interest. HA reports no conflict of interest. RvB reports no conflict of interest. WT  
476 reports no conflict of interest. SB reports not conflict of interest. ML reports no conflict of  
477 interest. RM reports no conflict of interest. MB reports no conflict of interest. JK reports no  
478 conflict of interest. MM reports no conflict of interest. JvS reports no conflict of interest. NvR  
479 reports no conflict of interest. VS reports no conflict of interest.

480

## 481 **Data sharing statement**

482 Datasets with source data for Table 1, Figure 2, Table 3 and Table 4, as well the R-code to fit  
483 the model is available from the Dryad repository, DOI:[WILL BE PROVIDED WHEN  
484 UNDER REVIEW]. Technical appendix can be found in **Supplemental Material 1**.

485

## 486 **Author contributorship statement**

487 Arjen-Kars Boer: Conceptualization (Lead), Data curation (Lead), Funding acquisition (Lead),  
488 Investigation (Equal), Methodology (Equal), Supervision (Equal), Writing-original draft  
489 (Equal), Writing-review & editing (Equal).

490 Ruben Deneer: Data curation (Equal), Formal analysis (Equal), Investigation (Equal),  
491 Methodology (Lead), Software (Lead), Visualization (Lead), Writing-original draft (Equal),  
492 Writing-review & editing (Equal).

- 1  
2  
3 493 Maaïke Maas: Conceptualization (Supporting), Resources (Supporting), Supervision  
4  
5 494 (Supporting), Validation (Supporting), Writing-review & editing (Equal).  
6  
7  
8 495 Heidi Ammerlaan: Conceptualization (Supporting), Resources (Supporting), Supervision  
9  
10 496 (Supporting), Validation (Equal), Writing-review & editing (Equal).  
11  
12  
13 497 Roland van Balkom: Conceptualization (Supporting), Resources (Supporting), Supervision  
14  
15 498 (Supporting), Validation (Supporting), Writing-review & editing (Equal).  
16  
17  
18 499 Wendy Thijssen: Conceptualization (Supporting), Resources (Supporting), Supervision  
19  
20 500 (Supporting), Validation (Supporting), Writing-review & editing (Equal).  
21  
22  
23  
24 501 Sophie Bennenbroek: Conceptualization (Supporting), Resources (Supporting), Supervision  
25  
26 502 (Supporting), Validation (Supporting), Writing-review & editing (Equal).  
27  
28  
29 503 Mathie Leers: Resources (Equal), Validation (Equal), Writing-review & editing (Equal).  
30  
31  
32 504 Remy Martens: Resources (Equal), Validation (Equal), Writing-review & editing (Equal).  
33  
34  
35 505 Madelon M. Buijs: Resources (Equal), Validation (Equal), Writing-review & editing (Equal).  
36  
37  
38 506 Jos Kerremans: Resources (Equal), Validation (Equal), Writing-review & editing (Equal).  
39  
40  
41 507 Muriël Messchaert: Resources (Equal), Validation (Equal), Writing-review & editing (Equal).  
42  
43  
44 508 Jeroen van Suijlen: Resources (Supporting), Validation (Supporting), Writing-review & editing  
45  
46 509 (Equal).  
47  
48  
49 510 Natal A.W. van Riel: Methodology (Supporting), Resources (Supporting), Supervision (Equal),  
50  
51 511 Writing-review & editing (Equal).  
52  
53  
54 512 Volkher Scharnhorst: Conceptualization (Equal), Funding acquisition (Equal), Project  
55  
56 513 administration (Lead), Resources (Equal), Supervision (Lead), Writing-review & editing  
57  
58 514 (Equal).  
59  
60

515 **References**

- 516 1 Coronavirus Disease (COVID-19) Situation Reports.  
517 <https://www.who.int/emergencies/diseases/novel-coronavirus-2019/situation-reports/>  
518 (accessed 4 Feb 2021).
- 519 2 Guan W, Ni Z, Hu Y, *et al*. Clinical Characteristics of Coronavirus Disease 2019 in  
520 China. <https://doi.org/10.1056/NEJMoa2002032> 2020;**382**:1708–20.  
521 doi:10.1056/NEJMOA2002032
- 522 3 Vetter P, Vu DL, L’Huillier AG, *et al*. Clinical features of covid-19. *BMJ* 2020;**369**.  
523 doi:10.1136/BMJ.M1470
- 524 4 Wynants L, Van Calster B, Collins GS, *et al*. Prediction models for diagnosis and  
525 prognosis of covid-19: Systematic review and critical appraisal. *BMJ* 2020;**369**:18.  
526 doi:10.1136/bmj.m1328
- 527 5 Albahri AS, Hamid RA, Alwan J k., *et al*. Role of biological Data Mining and Machine  
528 Learning Techniques in Detecting and Diagnosing the Novel Coronavirus (COVID-19):  
529 A Systematic Review. *J. Med. Syst.* 2020;**44**:122. doi:10.1007/s10916-020-01582-x
- 530 6 Hooli S, King C. Generalizability of Coronavirus Disease 2019 (COVID-19) Clinical  
531 Prediction Models. *Clin Infect Dis* 2020;**71**:897–897. doi:10.1093/cid/ciaa417
- 532 7 Prokop M, Everdingen W van, Vellinga T van R, *et al*. CO-RADS: A Categorical CT  
533 Assessment Scheme for Patients Suspected of Having COVID-19—Definition  
534 and Evaluation. <https://doi.org/10.1148/radiol2020201473> 2020;**296**:E97–104.  
535 doi:10.1148/RADIOL.2020201473
- 536 8 Goodacre S, Thomas B, Sutton L, *et al*. Derivation and validation of a clinical severity  
537 score for acutely ill adults with suspected COVID-19: The PRIEST observational cohort

- 1  
2  
3 538 study. *PLoS One* 2021;**16**:e0245840. doi:10.1371/JOURNAL.PONE.0245840  
4  
5  
6 539 9 Plante TB, Blau AM, Berg AN, *et al.* Development and external validation of a machine  
7  
8 540 learning tool to rule out COVID-19 among adults in the emergency department using  
9  
10 541 routine blood tests: A large, multicenter, real-world study. *J Med Internet Res*  
11  
12 542 2020;**22**:e24048. doi:10.2196/24048  
13  
14  
15  
16 543 10 Soltan AAS, Kouchaki S, Zhu T, *et al.* Rapid triage for COVID-19 using routine clinical  
17  
18 544 data for patients attending hospital: development and prospective validation of an  
19  
20 545 artificial intelligence screening test. *Lancet Digit Heal* 2021;**3**:e78–87.  
21  
22 546 doi:10.1016/S2589-7500(20)30274-0  
23  
24  
25  
26 547 11 R Core Team. R: A Language and Environment for Statistical Computing.  
27  
28 548 2020.<https://www.r-project.org/>  
29  
30  
31 549 12 Zou H. The adaptive lasso and its oracle properties. *J Am Stat Assoc* 2006;**101**:1418–29.  
32  
33 550 doi:10.1198/016214506000000735  
34  
35  
36 551 13 Tibshirani R. Regression Shrinkage and Selection Via the Lasso. *J R Stat Soc Ser B*  
37  
38 552 1996;**58**:267–88. doi:10.1111/j.2517-6161.1996.tb02080.x  
39  
40  
41 553 14 Friedman J, Hastie T, Tibshirani R. Regularization paths for generalized linear models  
42  
43 554 via coordinate descent. *J Stat Softw* 2010;**33**:1–22. doi:10.18637/jss.v033.i01  
44  
45  
46  
47 555 15 King G, Zeng L. Logistic Regression in Rare Events Data. *Polit Anal* 2001;**9**:137–63.  
48  
49 556 doi:10.1093/oxfordjournals.pan.a004868  
50  
51  
52 557 16 Efron B. Estimating the error rate of a prediction rule: Improvement on cross-validation.  
53  
54 558 *J Am Stat Assoc* 1983;**78**:316–31. doi:10.1080/01621459.1983.10477973  
55  
56  
57 559 17 Robin X, Turck N, Hainard A, *et al.* pROC: An open-source package for R and S+ to  
58  
59 560 analyze and compare ROC curves. *BMC Bioinformatics* 2011;**12**:77. doi:10.1186/1471-

- 1  
2  
3 561 2105-12-77  
4  
5  
6 562 18 Harrell Jr FE. rms: Regression Modeling Strategies. 2021.[https://cran.r-](https://cran.r-project.org/package=rms)  
7  
8 563 [project.org/package=rms](https://cran.r-project.org/package=rms)  
9  
10  
11 564 19 Ricós C, Alvarez V, Cava F, *et al.* Current databases on biological variation: Pros, cons  
12  
13 and progress. *Scand. J. Clin. Lab. Invest.* 1999;**59**:491–500.  
14 565  
15 doi:10.1080/00365519950185229  
16 566  
17  
18 567 20 Brinati D, Campagner A, Ferrari D, *et al.* Detection of COVID-19 Infection from  
19  
20 Routine Blood Exams with Machine Learning: A Feasibility Study. *J Med Syst*  
21 568  
22 2020;**44**:1–12. doi:10.1007/s10916-020-01597-4  
23 569  
24  
25  
26 570 21 Joshi RP, Pejaver V, Hammarlund NE, *et al.* A predictive tool for identification of  
27  
28 SARS-CoV-2 PCR-negative emergency department patients using routine test results. *J*  
29 571  
30 *Clin Virol* 2020;**129**:104502. doi:10.1016/j.jcv.2020.104502  
31 572  
32  
33  
34 573 22 Qin L, Yang Y, Cao Q, *et al.* A predictive model and scoring system combining clinical  
35  
36 and CT characteristics for the diagnosis of COVID-19. *Eur Radiol* 2020;**30**:6797–807.  
37 574  
38 doi:10.1007/s00330-020-07022-1  
39 575  
40  
41 576 23 Kurstjens S, van der Horst A, Herpers R, *et al.* Rapid identification of SARS-CoV-2-  
42  
43 infected patients at the emergency department using routine testing. *Clin Chem Lab Med*  
44 577  
45 2020;**58**:1587–93. doi:10.1515/cclm-2020-0593  
46 578  
47  
48  
49 579 24 Fink DL, Khan PY, Goldman N, *et al.* Development and internal validation of a  
50  
51 diagnostic prediction model for COVID-19 at time of admission to hospital. *QJM An Int*  
52 580  
53 *J Med* Published Online First: 9 November 2020. doi:10.1093/qjmed/hcaa305  
54 581  
55  
56 582 25 Giamello JD, Paglietta G, Cavalot G, *et al.* A simple tool to help ruling-out Covid-19 in  
57  
58 the emergency department: derivation and validation of the LDH-CRP-Lymphocyte  
59 583  
60

- 1  
2  
3 584 (LCL) score. *Emerg Care J* 2020;**16**. doi:10.4081/ecj.2020.9336  
4  
5  
6 585 26 Tordjman M, Mekki A, Mali RD, *et al*. Pre-test probability for SARS-Cov-2-related  
7  
8 586 infection score: The PARIS score. *PLoS One* 2020;**15**:e0243342.  
9  
10 587 doi:10.1371/journal.pone.0243342  
11  
12  
13 588 27 Peto T, Affron D, Afrough B, *et al*. COVID-19: Rapid antigen detection for SARS-CoV-  
14  
15 589 2 by lateral flow assay: A national systematic evaluation of sensitivity and specificity for  
16  
17 mass-testing. *EClinicalMedicine* 2021;**36**:100924.  
18 590  
19  
20 591 doi:10.1016/J.ECLINM.2021.100924  
21  
22  
23 592 28 García-Fiñana M, Hughes DM, Cheyne CP, *et al*. Performance of the Innova SARS-  
24  
25 593 CoV-2 antigen rapid lateral flow test in the Liverpool asymptomatic testing pilot:  
26  
27 594 population based cohort study. *BMJ* 2021;**374**:1637. doi:10.1136/BMJ.N1637  
28  
29  
30  
31 595  
32  
33  
34 596  
35  
36  
37  
38  
39  
40  
41  
42  
43  
44  
45  
46  
47  
48  
49  
50  
51  
52  
53  
54  
55  
56  
57  
58  
59  
60

1  
2  
3 597 **Figure legends**  
4

5 598  
6

7  
8 599 **Figure 1: Inclusion flow of patients in the development (A) and temporal validation (B)**  
9  
10 600 **dataset.**

11  
12  
13 601 *All patient admissions with routine venous blood sampling at the emergency department (ED)*  
14  
15 602 *were included. For the development dataset, completeness of the lab panel was assessed for*  
16  
17 603 *all 28 laboratory tests, for the temporal validation dataset this was only necessary for 10*  
18  
19 604 *laboratory tests. The major causes of missingness are described in the text. In the*  
20  
21 605 *development dataset, presentations with extreme values ( $>10$  SD) were excluded. The same*  
22  
23 606 *limits were applied to the temporal validation dataset (see Table 2 for limits).*  
24  
25  
26  
27

28 607  
29

30  
31 608 **Figure 2: Probability density plot of the CoLab-linear predictor.**  
32

33  
34 609 *The probability density plots for COVID (dark grey) and non-COVID patients (light grey) are*  
35  
36 610 *plotted against the linear predictor (see table 2). The CoLab-score cut-offs ( $-5.83$ ,  $-4.02$ ,  $-$*   
37  
38 611  *$3.29$ ,  $-2.34$  and  $-1.64$ ) are depicted with vertical dashed lines. The white-boxed numbers*  
39  
40 612 *(between the cut-offs) represent the corresponding CoLab-score. Note that while the area*  
41  
42 613 *under both curves is identical (since these are probability density functions), in absolute*  
43  
44 614 *numbers the “negative or untested”-group is about 36 times larger than the PCR positive*  
45  
46 615 *group.*  
47  
48  
49

50 616  
51

52  
53 617 **Figure 3: Inclusion flow of ED patients in three external centers.**  
54

55  
56 618 *All emergency department (ED) presentations with routine venous blood sampling were*  
57  
58 619 *included. Missingness of lab panels was assessed for the 11 variables in the CoLab-score (see*  
59  
60



1  
2  
3 620 *Table 2). Re-presentations after a positive PCR result or clinical COVID-19 registration were*  
4  
5 621 *excluded as “previous COVID-19+”. Presentations with any laboratory result above the*  
6  
7 622 *limits of the CoLab-score (see Table 2) were excluded.*  
8  
9  
10  
11  
12  
13  
14  
15  
16  
17  
18  
19  
20  
21  
22  
23  
24  
25  
26  
27  
28  
29  
30  
31  
32  
33  
34  
35  
36  
37  
38  
39  
40  
41  
42  
43  
44  
45  
46  
47  
48  
49  
50  
51  
52  
53  
54  
55  
56  
57  
58  
59  
60

For peer review only

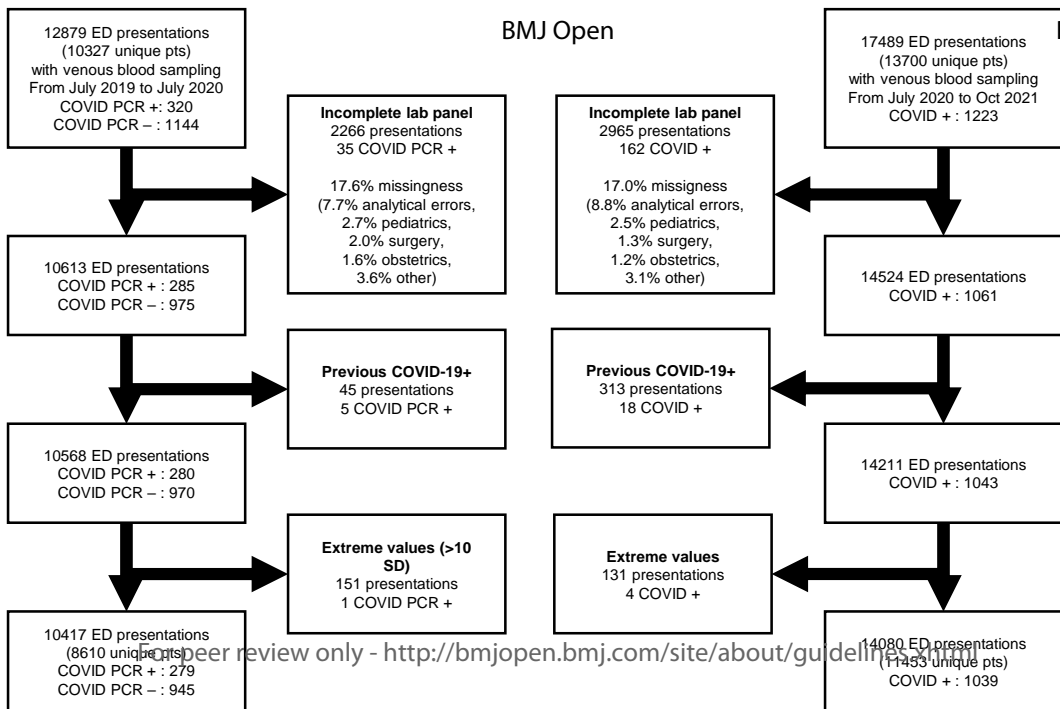

### CoLab-score

Threshold

### SARS CoV-2 PCR

- Negative or untested
- Positive

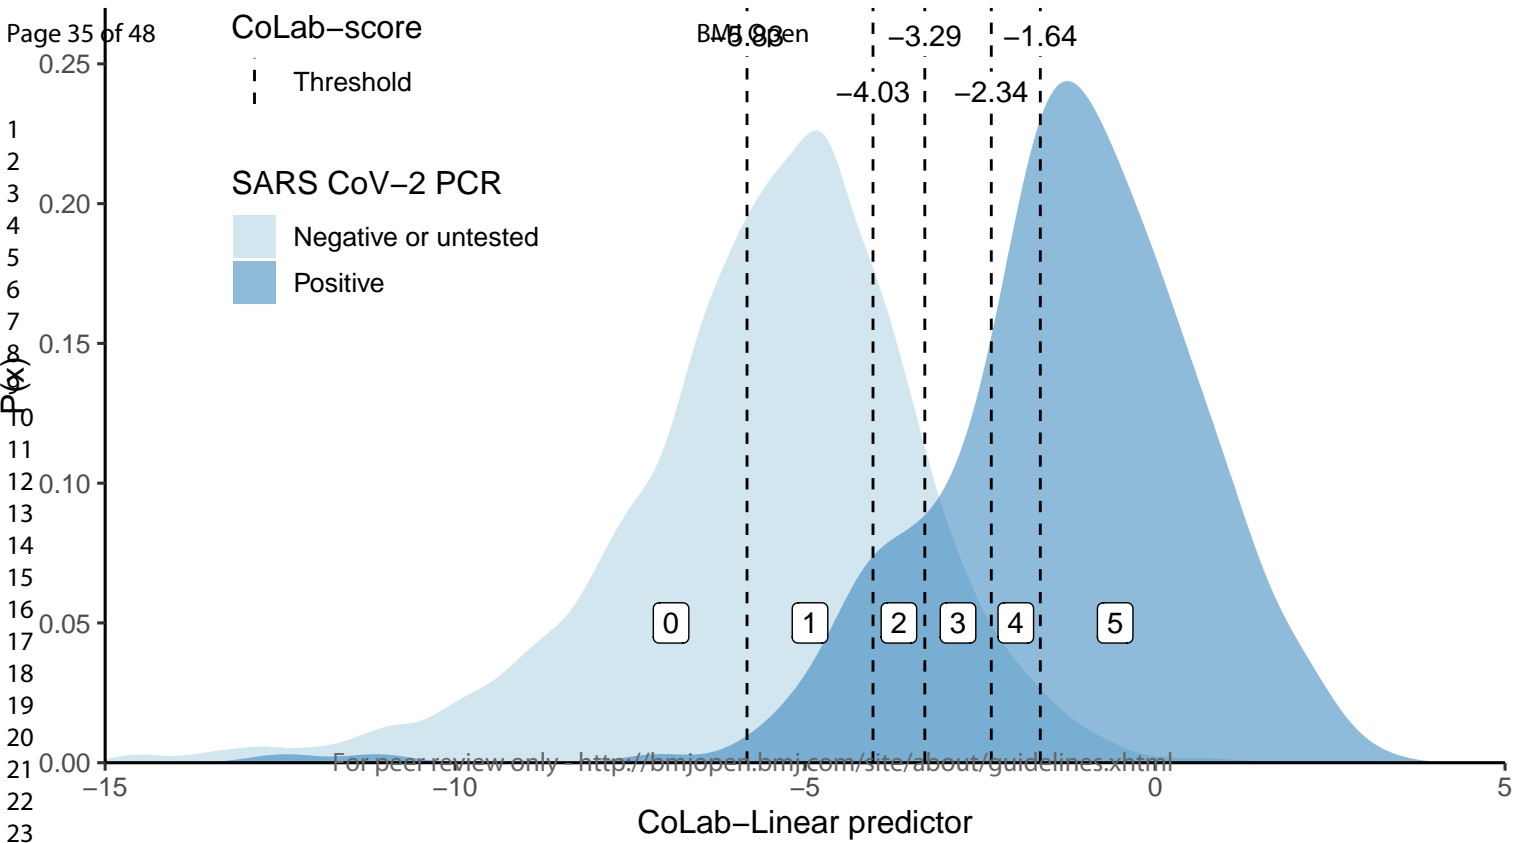

### Center 1

### Center 2



### Center 3



## Supplemental material 1

### Model fitting

Prior to model fitting, covariates were scaled to zero mean and unit variance, after model fitting coefficients were unscaled to obtain regression coefficients on the original scale. In adaptive lasso, weights are applied to each of the covariates present in the lasso constraint, the weight vector has to be calculated before the adaptive lasso regression is performed. Due to multicollinearity between laboratory tests in the routine lab panel, weights in the adaptive lasso were based on ridge regression estimates ( $\hat{\beta}_{ridge}$ ) as recommended by Zou. To obtain  $\hat{\beta}_{ridge}$  the optimal penalty ( $\lambda$ ) for the ridge regression was chosen using 10 fold cross-validation (CV) with area under the ROC curve (AUC) as the loss function. The  $\lambda$  corresponding to the maximum AUC was selected to obtain  $\hat{\beta}_{ridge}$ . The weight vector ( $\hat{w}$ ) was calculated by  $\hat{w} = 1/|\hat{\beta}_{ridge}|^2$ . This weight vector was then used to fit an adaptive lasso regression where  $\lambda$  was chosen by the criterion  $\pm 1$  SE of the maximum AUC.

### Model intercept correction

The linear predictor for a patient  $i$  is calculated as follows:  $lp_i = \beta_0 + \beta_1 x_{i1} + \dots + \beta_n x_{in}$ . Where  $n$  is the number of variables in the final model,  $x_{in}$  are the observed predictor variables for subject  $i$  and  $\beta_n$  the model coefficients. The linear predictor can then be converted to a probability for patient  $i$  ( $P_i$ ) by the logistic function:  $P_i = \frac{1}{1+e^{-lp_i}}$

The intercept term  $\beta_0$  is sensitive to the fraction of cases versus controls in the dataset/population. Since the model is fitted to a case-control dataset where the number cases is fixed (all patients tested positive for COVID-19) and the number of controls is randomly chosen (a 6-month period pre-COVID), the intercept term  $\beta_0$  is a result of this choice and will likely not be generalizable to the real-world setting. Prior correction is a method to correct the estimate of the intercept based on the true fraction of positives in the population,  $\tau$  (prevalence of COVID-19 in the ED) and the fraction of cases in the development dataset,  $\bar{y}$ . The intercept term  $\beta_0$  can then be corrected to obtain  $\beta_{0corrected}$  using the following formula:

$$\beta_{0corrected} = \beta_0 + \beta_{adj}$$

$$\beta_{adj} = -\ln \left[ \left( \frac{1-\tau}{\tau} \right) \left( \frac{\bar{y}}{1-\bar{y}} \right) \right]$$

In our dataset  $\bar{y} = 0.02675$  therefore:

$$\beta_{adj} = -\ln \left( \frac{1-\tau}{\tau} \right) + 3.594$$

An estimate  $\bar{\tau}$  can be used for the prevalence  $\tau$  to obtain  $\bar{\beta}_{adj}$  which can be plugged in the original linear predictor formula to obtain calibrated probabilities:

$$lp_i(\tau) = \beta_0 - \ln \left( \frac{1-\tau}{\tau} \right) + 3.594 + \beta_1 x_{i1} + \dots + \beta_n x_{in}$$

## CoLab-score

An alternative, which is the basis of the CoLab-score, is to choose a fixed probability  $P_i$  above which one considers a patient eligible for further testing. The probability can be expressed as a number needed to test. If one is willing to test 10 patients to find one positive, all patients with  $P_i \geq 0.1$  should be considered positive. In this study a number needed to test of 15 is used, therefore all patients with a  $P_i \geq 0.067$  should be considered positive. On the linear predictor scale this translates to  $\text{logit}(0.067) = -2.639$ . To determine the cutoffs for difference prevalence thresholds one solves the following equation:

$$\beta_0 + \beta_{adj} + \beta_1 x_{i1} + \dots + \beta_n x_{in} \geq -2.639$$

$$\beta_0 + \beta_1 x_{i1} + \dots + \beta_n x_{in} \geq -2.639 - \beta_{adj}$$

$$lp_i(\tau) \geq \ln\left(\frac{1-\tau}{\tau}\right) - 6.233$$

Choosing values for  $\tau$  yields the cutoffs for the CoLab score:

$$lp_i(\tau = 0.4) \geq -5.83 \text{ (CoLab-score} = 1)$$

$$lp_i(\tau = 0.1) \geq -4.03 \text{ (CoLab-score} = 2)$$

$$lp_i(\tau = 0.05) \geq -3.29 \text{ (CoLab-score} = 3)$$

$$lp_i(\tau = 0.02) \geq -2.34 \text{ (CoLab-score} = 4)$$

$$lp_i(\tau = 0.01) \geq -1.64 \text{ (CoLab-score} = 5)$$

These thresholds correspond to CoLab-scores 0 to 5. The interpretation of these scores is as follows; if the prevalence is <1%, only CoLab-score 5 should be classified as positive and CoLab-score 0 till 4 as negative. If the prevalence is 1% – 2%, CoLab-score 4 and 5 should be classified as positive and 1 – 3 negative. Similarly, with a prevalence of 2 – 5% the split is between CoLab-score 2 and 3 and with prevalence of 5 – 10% between CoLab-score 1 – 2. If the prevalence is higher than 10% only CoLab-score 0 is classified as negative. Using the CoLab-score in this fashion, aims to preserve a number need to test of 15.

## Relative importance of variables

Since the variables included in the model are on different scales, the magnitude of the unscaled coefficients cannot be used to compare the importance of variables to each other. To give some indication of the importance of the variables in predicting the outcome, the unscaled coefficients obtained from the adaptive lasso regression were used to calculate the relative importance. The variable with the highest unscaled coefficient was used as maximum ( $\beta_{unscaled,max}$ ), and all other scaled coefficients were divided by this maximum and multiplied by 100 to obtain the relative importance in %:  $\frac{\beta_{unscaled}}{\beta_{unscaled,max}} \cdot 100$ .

## Supplemental material 2

### Vaccination status and COVID-19 ED prevalence plot

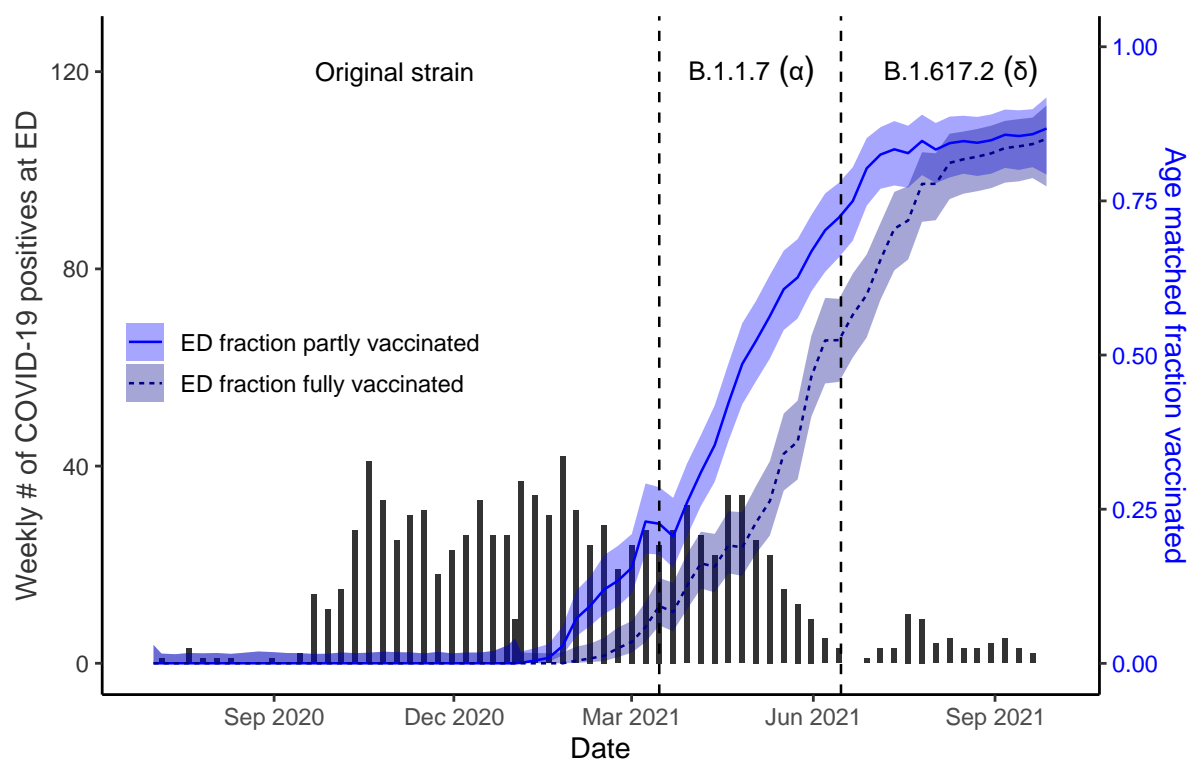

**Figure 1: Temporal validation period split into three phases characterized by weekly number of new COVID-19 cases at the emergency department (ED) and estimated fraction of ED patients vaccinated.**

*The temporal validation dataset consists of ED presentations from July 2020 until October 2021. As stated in the “Materials and Methods” section, this period was split into three phases: i) from July 2020 until March 2021, no vaccination and no variants of concern identified ii) from March 2021 until June 2021, partial vaccination and B.1.1.7 (Alpha) variant identified as dominant iii) from June 2021 until October 2021, widespread vaccination and B.1.617.2 (Delta) variant identified as dominant. The ED fraction vaccinated is estimated by merging data from the Dutch national institute of public health by the date of the ED presentation and the year of birth of the patient. The gray bars depict weekly number of new COVID-19 cases at the ED, the blue lines the estimated fraction of ED patients fully or partially vaccinated.*

## CoLab-score performance

| Phase                                | Cases/controls (prevalence) | AUC                   |
|--------------------------------------|-----------------------------|-----------------------|
| Original strain & no vaccinations    | 694/7999 (8.6%)             | 0.909 (0.896 - 0.923) |
| B.1.1.7 strain & partial vaccination | 287/2845 (10.1%)            | 0.937 (0.921 - 0.953) |
| B.1.617.2 strain & full vaccination  | 58/3236 (1.8%)              | 0.898 (0.857 - 0.939) |

| CoLab-score | Phase                                | Sensitivity           | Specificity           | PPV                   | NPV                   |
|-------------|--------------------------------------|-----------------------|-----------------------|-----------------------|-----------------------|
| 0           | Original strain & no vaccinations    | 0.960 (0.944 - 0.974) | 0.418 (0.407 - 0.429) | 0.135 (0.133 - 0.138) | 0.991 (0.987 - 0.994) |
|             | B.1.1.7 strain & partial vaccination | 0.983 (0.969 - 0.997) | 0.432 (0.413 - 0.450) | 0.162 (0.158 - 0.168) | 0.996 (0.992 - 0.999) |
|             | B.1.617.2 strain & full vaccination  | 0.983 (0.948 - 1.000) | 0.415 (0.396 - 0.432) | 0.030 (0.028 - 0.031) | 0.999 (0.998 - 1.000) |
| ≤1          | Original strain & no vaccinations    | 0.879 (0.854 - 0.902) | 0.789 (0.779 - 0.798) | 0.283 (0.273 - 0.294) | 0.986 (0.983 - 0.988) |
|             | B.1.1.7 strain & partial vaccination | 0.916 (0.885 - 0.948) | 0.809 (0.793 - 0.824) | 0.350 (0.332 - 0.370) | 0.989 (0.984 - 0.993) |
|             | B.1.617.2 strain & full vaccination  | 0.862 (0.776 - 0.948) | 0.780 (0.765 - 0.794) | 0.067 (0.059 - 0.074) | 0.997 (0.995 - 0.999) |
| ≤2          | Original strain & no vaccinations    | 0.813 (0.784 - 0.842) | 0.894 (0.887 - 0.901) | 0.421 (0.404 - 0.441) | 0.980 (0.978 - 0.983) |
|             | B.1.1.7 strain & partial vaccination | 0.864 (0.826 - 0.902) | 0.897 (0.885 - 0.908) | 0.484 (0.455 - 0.516) | 0.983 (0.979 - 0.988) |
|             | B.1.617.2 strain & full vaccination  | 0.690 (0.569 - 0.810) | 0.892 (0.881 - 0.902) | 0.104 (0.086 - 0.123) | 0.994 (0.991 - 0.996) |
| ≤3          | Original strain & no vaccinations    | 0.697 (0.661 - 0.731) | 0.962 (0.957 - 0.966) | 0.634 (0.605 - 0.662) | 0.971 (0.968 - 0.974) |
|             | B.1.1.7 strain & partial vaccination | 0.760 (0.711 - 0.812) | 0.963 (0.955 - 0.970) | 0.696 (0.650 - 0.739) | 0.973 (0.967 - 0.978) |
|             | B.1.617.2 strain & full vaccination  | 0.621 (0.483 - 0.741) | 0.960 (0.954 - 0.967) | 0.222 (0.178 - 0.268) | 0.993 (0.990 - 0.995) |
| ≤4          | Original strain & no vaccinations    | 0.566 (0.529 - 0.602) | 0.984 (0.981 - 0.987) | 0.775 (0.740 - 0.808) | 0.960 (0.957 - 0.963) |
|             | B.1.1.7 strain & partial vaccination | 0.645 (0.589 - 0.704) | 0.983 (0.978 - 0.988) | 0.809 (0.762 - 0.856) | 0.961 (0.955 - 0.967) |
|             | B.1.617.2 strain & full vaccination  | 0.517 (0.397 - 0.638) | 0.986 (0.982 - 0.990) | 0.400 (0.319 - 0.500) | 0.991 (0.989 - 0.993) |

**Table 2: Diagnostic performance of the CoLab-score in the temporal validation dataset, split by phase.**



Sensitivities, specificities, positive predictive values (PPV) and negative predictive values (NPV) are shown for fixed cut-offs (CoLab-score 0 till  $\leq 4$ ) with bootstrapped 95% confidence intervals in parentheses. The temporal validation dataset is split into three phases according to dominant SARS-CoV-2 strains in the Netherlands and estimated fraction of ED patients vaccinated (see Figure above). Note that “0” lists the sensitivity and NPV of CoLab-score 0 and “ $\leq 4$ ” lists the specificity and PPV of CoLab-score 5. The AUC was significantly higher in the second phase as compared to the first phase (DeLong test p-value: 0.0175), but did not differ significantly between the third and first phase (DeLong test p-value: 0.3903).

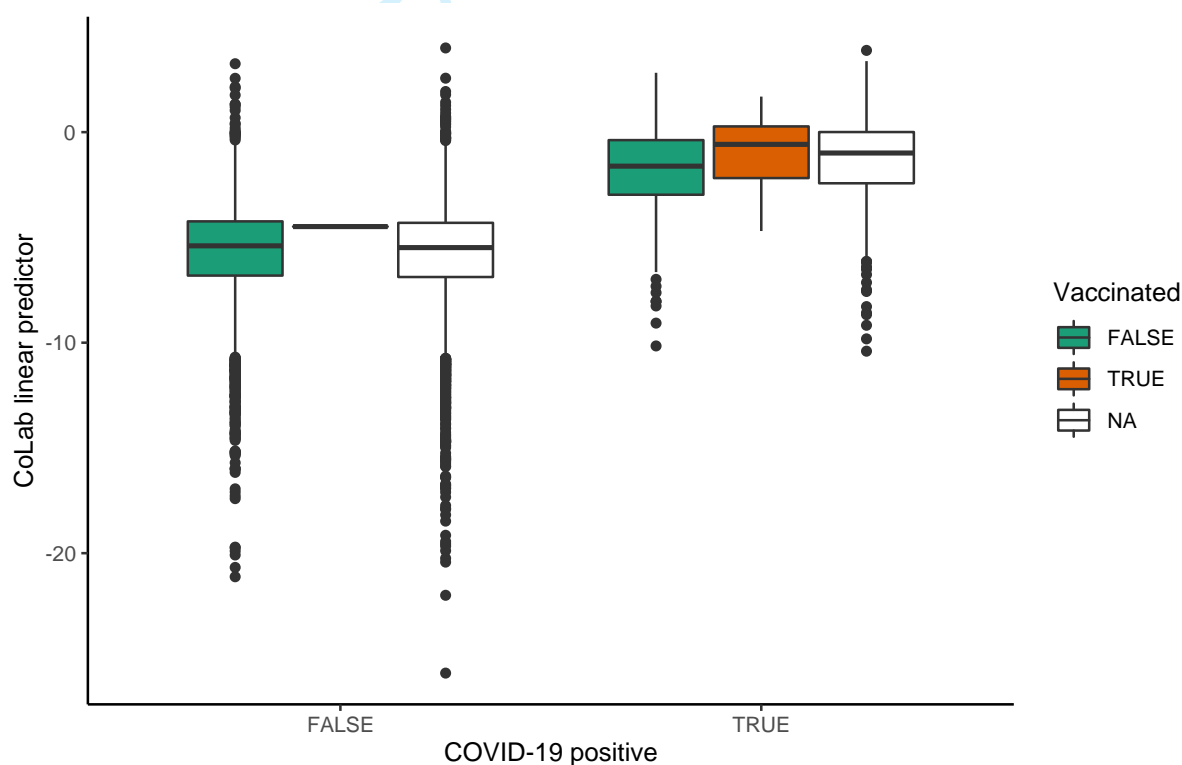

**Figure 2: Boxplots of CoLab linear predictor versus COVID-19 positive, split by registered vaccination status.**

The CoLab linear predictor is calculated for all ED presentations in the temporal validation set. Presentations who are registered as vaccinated are labeled TRUE ( $N = 13$ ).

Presentations before vaccine roll-out are labeled FALSE ( $N = 5855$ ). Presentations during

1  
2  
3 *vaccine roll-out but where no status is registered are labeled NA (N = 8212). Of the 13*  
4  
5 *presentations who were registered as vaccinated, 12 were COVID-19 positive and 1 negative.*  
6  
7 *Note that vaccination status is only registered if a patient is SARS-CoV-2 PCR positive or*  
8  
9 *considered positive until proven otherwise, therefore there is only one COVID-19 negative*  
10  
11 *patient with a registered vaccination status.*  
12  
13  
14  
15  
16  
17  
18  
19  
20  
21  
22  
23  
24  
25  
26  
27  
28  
29  
30  
31  
32  
33  
34  
35  
36  
37  
38  
39  
40  
41  
42  
43  
44  
45  
46  
47  
48  
49  
50  
51  
52  
53  
54  
55  
56  
57  
58  
59  
60

For peer review only

### Supplemental material 3



**Figure 1: CoLab-score calibration plots of the temporal validation (A), external validation center 1 (B), external validation center 2 (C) and external validation center 3 (D).**

*In the calibration plots, the proportion of observed COVID-19 positives versus expected probabilities are plotted. Observations are grouped with an average of 150 observations per group. The expected probabilities follow from applying the inverse logit function to the CoLab-linear predictor calculated from Table 2. If the observed proportion in an external dataset is lower than the expected proportion, this means risks are over-estimated, if the observed fraction is higher, risks are under-estimated. Ideally, observed proportions are equal to expected proportions, this ideal-calibration-line is shown as a straight line through the origin with a slope of 1. The logistic calibration line is a logistic regression fit of the predicted probabilities. [Intercept, slope] for plots A-D: A [1.34, 1.08], B [-0.39, 0.92], C [-0.76, 0.77], D [0.08, 0.79]. Although no validation datasets show perfect calibration, this is the result of differences in COVID-19 prevalence in the temporal validation dataset (7.4% versus 2.2%) and differences in calibration of laboratory equipment in the three external centers.*



**Figure 2: Probability density plots of laboratory parameters.**

*Probability density plots are shown for all control patients of the development dataset and the three external centers. Ideally all distributions should overlap since this implies that control patient populations are most likely similar in the development dataset to the external datasets.*

*When comparing the distribution of the CoLab variables for all control-patients across different external validation datasets, albumin and LD show the largest deviations.*

## Supplemental material 4



**Figure 1: Association between the CoLab-linear predictor and the duration of COVID-19-related symptoms.**

*For all PCR-positive ED presentations in the development and temporal validation dataset, the CoLab-linear predictor is plotted against the duration of COVID-related symptoms as registered in the electronic patient records. Patients with unknown duration are not plotted. Patients without symptoms were plotted at 0 days. The solid horizontal lines represent the CoLab-score thresholds, the dashed line is a LOESS regression curve with 95% CI. As the duration of symptoms is an integer, some random jitter was added to the days, for visualization purposes. Note that only the first 14 days are shown in this graph.*

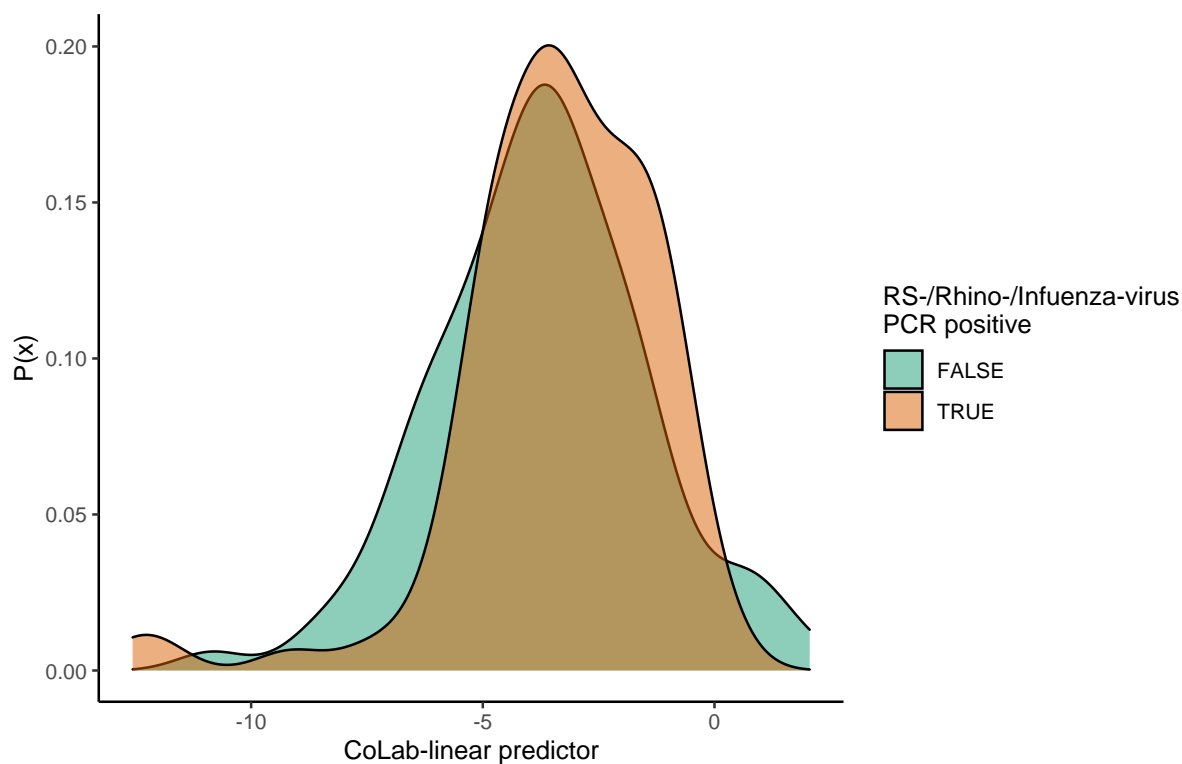

**Figure 2: Probability density plot of CoLab-score for RS-, Rhino- and Influenza-virus PCR tested ED patients.**

*For 183 ED presentations that were PCR tested for either RS-, Rhino- and Influenza-virus the CoLab-score was calculated. 91 presentations were PCR positive, 92 were PCR negative. The CoLab-score is only marginally elevated for PCR positive patients, the area under the ROC-curve in separating both groups is 0.573 (95% CI: 0.4896-0.6563).*

| Inclusion criterion                                     | Cases/controls (prevalence) | AUC                   |
|---------------------------------------------------------|-----------------------------|-----------------------|
| Temporal validation (reference)                         | 1039/14080 (7.4%)           | 0.916 (0.906 - 0.927) |
| Only first presentations, re-presentations are excluded | 937/11166 (8.4%)            | 0.919 (0.909 - 0.930) |
| Only PCR-tested presentations                           | 372/4062 (9.2%)             | 0.840 (0.817 - 0.862) |

| CoLab-score | Validation set           | Sensitivity              | Specificity              | PPV                      | NPV                      | TP                   | TN                       | FP                    | FN                 |
|-------------|--------------------------|--------------------------|--------------------------|--------------------------|--------------------------|----------------------|--------------------------|-----------------------|--------------------|
| 0           | Reference                | 0.967<br>(0.956 - 0.978) | 0.420<br>(0.411 - 0.428) | 0.117<br>(0.115 - 0.119) | 0.994<br>(0.992 - 0.996) | 1005<br>(993 - 1016) | 5476<br>(5366 - 5587)    | 7565<br>(7454 - 7675) | 34<br>(23 - 46)    |
|             | First presentations      | 0.968<br>(0.956 - 0.979) | 0.416<br>(0.406 - 0.426) | 0.132<br>(0.130 - 0.134) | 0.993<br>(0.990 - 0.995) | 907<br>(896 - 917)   | 4259<br>(4156 - 4353)    | 5970<br>(5876 - 6073) | 30<br>(20 - 41)    |
|             | PCR-tested presentations | 0.946<br>(0.922 - 0.968) | 0.353<br>(0.338 - 0.368) | 0.129<br>(0.125 - 0.132) | 0.985<br>(0.979 - 0.991) | 352<br>(343 - 360)   | 1303<br>(1246 - 1359)    | 2387<br>(2331 - 2444) | 20<br>(12 - 29)    |
| ≤ 1         | Reference                | 0.888<br>(0.870 - 0.908) | 0.791<br>(0.783 - 0.798) | 0.253<br>(0.245 - 0.261) | 0.989<br>(0.987 - 0.991) | 923<br>(904 - 943)   | 10311<br>(10215 - 10401) | 2730<br>(2640 - 2826) | 116<br>(96 - 135)  |
|             | First presentations      | 0.890<br>(0.870 - 0.908) | 0.793<br>(0.785 - 0.801) | 0.282<br>(0.273 - 0.292) | 0.987<br>(0.985 - 0.990) | 834<br>(815 - 851)   | 8112<br>(8030 - 8194)    | 2117<br>(2035 - 2199) | 103<br>(86 - 122)  |
|             | PCR-tested presentations | 0.852<br>(0.817 - 0.887) | 0.671<br>(0.656 - 0.686) | 0.207<br>(0.197 - 0.217) | 0.978<br>(0.973 - 0.983) | 317<br>(304 - 330)   | 2477<br>(2421 - 2533)    | 1213<br>(1157 - 1269) | 55<br>(42 - 68)    |
| ≤ 2         | Reference                | 0.820<br>(0.796 - 0.843) | 0.894<br>(0.889 - 0.899) | 0.382<br>(0.367 - 0.396) | 0.984<br>(0.982 - 0.986) | 852<br>(827 - 876)   | 11661<br>(11591 - 11729) | 1380<br>(1312 - 1450) | 187<br>(163 - 212) |
|             | First presentations      | 0.824<br>(0.798 - 0.845) | 0.898<br>(0.892 - 0.904) | 0.426<br>(0.410 - 0.441) | 0.982<br>(0.980 - 0.985) | 772<br>(748 - 792)   | 9187<br>(9127 - 9249)    | 1042<br>(980 - 1102)  | 165<br>(145 - 189) |
|             | PCR-tested presentations | 0.734<br>(0.688 - 0.777) | 0.800<br>(0.786 - 0.812) | 0.270<br>(0.252 - 0.287) | 0.968<br>(0.962 - 0.973) | 273<br>(256 - 289)   | 2951<br>(2902 - 2997)    | 739<br>(693 - 788)    | 99<br>(83 - 116)   |
| ≤ 3         | Reference                | 0.710<br>(0.682 - 0.738) | 0.962<br>(0.958 - 0.965) | 0.596<br>(0.573 - 0.618) | 0.977<br>(0.974 - 0.979) | 738<br>(709 - 767)   | 12540<br>(12496 - 12582) | 501<br>(459 - 545)    | 301<br>(272 - 330) |
|             | First presentations      | 0.716<br>(0.687 - 0.744) | 0.966<br>(0.962 - 0.969) | 0.658<br>(0.633 - 0.682) | 0.974<br>(0.971 - 0.976) | 671<br>(644 - 697)   | 9880<br>(9844 - 9915)    | 349<br>(314 - 385)    | 266<br>(240 - 293) |
|             | PCR-tested presentations | 0.591<br>(0.540 - 0.640) | 0.911<br>(0.902 - 0.921) | 0.403<br>(0.370 - 0.433) | 0.957<br>(0.952 - 0.962) | 220<br>(201 - 238)   | 3363<br>(3328 - 3397)    | 327<br>(293 - 362)    | 152<br>(134 - 171) |
| ≤ 4         | Reference                | 0.585<br>(0.556 - 0.615) | 0.984<br>(0.982 - 0.987) | 0.750<br>(0.724 - 0.778) | 0.968<br>(0.965 - 0.970) | 608<br>(578 - 639)   | 12838<br>(12811 - 12866) | 203<br>(175 - 230)    | 431<br>(400 - 461) |
|             | First presentations      | 0.590<br>(0.558 - 0.621) | 0.987<br>(0.985 - 0.989) | 0.805<br>(0.776 - 0.832) | 0.963<br>(0.961 - 0.966) | 553<br>(523 - 582)   | 10095<br>(10071 - 10117) | 134<br>(112 - 158)    | 384<br>(355 - 414) |
|             | PCR-tested presentations | 0.452<br>(0.401 - 0.503) | 0.959<br>(0.953 - 0.965) | 0.526<br>(0.480 - 0.575) | 0.945<br>(0.941 - 0.950) | 168<br>(149 - 187)   | 3539<br>(3516 - 3562)    | 151<br>(128 - 174)    | 204<br>(185 - 223) |

1  
2  
3 **Table 1: Sensitivity analysis of the CoLab-score in the temporal validation dataset using**  
4 **different inclusion criteria.**  
5

6  
7 *Sensitivities, specificities, positive predictive values (PPV), negative predictive values (NPV),*  
8 *true positives (TP), true negatives (TN), false positives (FP) and false negatives (FN) are*  
9 *shown for fixed cut-offs (CoLab-score 0 till  $\leq 4$ ) with bootstrapped 95% confidence intervals*  
10 *in parentheses. The temporal validation dataset is used to compare the performance of the*  
11 *CoLab-score with inclusion criteria that differ from the development dataset. The first line*  
12 *shows the performance of the temporal validation dataset with the original inclusion criteria*  
13 *as specified in Figure 1B. The second line shows the performance of the CoLab-score when*  
14 *all re-presentations are excluded (i.e. no repeated presentations). The third line shows the*  
15 *performance of the CoLab-score in the subgroup of patients that underwent PCR-testing.*  
16  
17  
18  
19  
20  
21  
22  
23  
24  
25  
26  
27  
28  
29  
30  
31  
32  
33  
34  
35  
36  
37  
38  
39  
40  
41  
42  
43  
44  
45  
46  
47  
48  
49  
50  
51  
52  
53  
54  
55  
56  
57  
58  
59  
60



## TRIPOD Checklist: Prediction Model Development and Validation

| Section/Topic                | Item | Checklist Item | Page                                                                                                                                                                                                  |           |
|------------------------------|------|----------------|-------------------------------------------------------------------------------------------------------------------------------------------------------------------------------------------------------|-----------|
| <b>Title and abstract</b>    |      |                |                                                                                                                                                                                                       |           |
| Title                        | 1    | D;V            | Identify the study as developing and/or validating a multivariable prediction model, the target population, and the outcome to be predicted.                                                          | 1         |
| Abstract                     | 2    | D;V            | Provide a summary of objectives, study design, setting, participants, sample size, predictors, outcome, statistical analysis, results, and conclusions.                                               | 3, 4      |
| <b>Introduction</b>          |      |                |                                                                                                                                                                                                       |           |
| Background and objectives    | 3a   | D;V            | Explain the medical context (including whether diagnostic or prognostic) and rationale for developing or validating the multivariable prediction model, including references to existing models.      | 6, 7      |
|                              | 3b   | D;V            | Specify the objectives, including whether the study describes the development or validation of the model or both.                                                                                     | 7         |
| <b>Methods</b>               |      |                |                                                                                                                                                                                                       |           |
| Source of data               | 4a   | D;V            | Describe the study design or source of data (e.g., randomized trial, cohort, or registry data), separately for the development and validation data sets, if applicable.                               | 8, 11-12  |
|                              | 4b   | D;V            | Specify the key study dates, including start of accrual; end of accrual; and, if applicable, end of follow-up.                                                                                        | 8         |
| Participants                 | 5a   | D;V            | Specify key elements of the study setting (e.g., primary care, secondary care, general population) including number and location of centres.                                                          | 8         |
|                              | 5b   | D;V            | Describe eligibility criteria for participants.                                                                                                                                                       | 8, 9, S1  |
|                              | 5c   | D;V            | Give details of treatments received, if relevant.                                                                                                                                                     | N/A       |
| Outcome                      | 6a   | D;V            | Clearly define the outcome that is predicted by the prediction model, including how and when assessed.                                                                                                | 9         |
|                              | 6b   | D;V            | Report any actions to blind assessment of the outcome to be predicted.                                                                                                                                | N/A       |
| Predictors                   | 7a   | D;V            | Clearly define all predictors used in developing or validating the multivariable prediction model, including how and when they were measured.                                                         | 8, 9      |
|                              | 7b   | D;V            | Report any actions to blind assessment of predictors for the outcome and other predictors.                                                                                                            | N/A       |
| Sample size                  | 8    | D;V            | Explain how the study size was arrived at.                                                                                                                                                            | N/A       |
| Missing data                 | 9    | D;V            | Describe how missing data were handled (e.g., complete-case analysis, single imputation, multiple imputation) with details of any imputation method.                                                  | 9         |
| Statistical analysis methods | 10a  | D              | Describe how predictors were handled in the analyses.                                                                                                                                                 | 10        |
|                              | 10b  | D              | Specify type of model, all model-building procedures (including any predictor selection), and method for internal validation.                                                                         | 10-12, S1 |
|                              | 10c  | V              | For validation, describe how the predictions were calculated.                                                                                                                                         | 16        |
|                              | 10d  | D;V            | Specify all measures used to assess model performance and, if relevant, to compare multiple models.                                                                                                   | 11-13     |
|                              | 10e  | V              | Describe any model updating (e.g., recalibration) arising from the validation, if done.                                                                                                               | N/A       |
| Risk groups                  | 11   | D;V            | Provide details on how risk groups were created, if done.                                                                                                                                             | N/A       |
| Development vs. validation   | 12   | V              | For validation, identify any differences from the development data in setting, eligibility criteria, outcome, and predictors.                                                                         | 22        |
| <b>Results</b>               |      |                |                                                                                                                                                                                                       |           |
| Participants                 | 13a  | D;V            | Describe the flow of participants through the study, including the number of participants with and without the outcome and, if applicable, a summary of the follow-up time. A diagram may be helpful. | F1        |
|                              | 13b  | D;V            | Describe the characteristics of the participants (basic demographics, clinical features, available predictors), including the number of participants with missing data for predictors and outcome.    | T1        |
|                              | 13c  | V              | For validation, show a comparison with the development data of the distribution of important variables (demographics, predictors and outcome).                                                        | S3        |
| Model development            | 14a  | D              | Specify the number of participants and outcome events in each analysis.                                                                                                                               | F1, F3    |
|                              | 14b  | D              | If done, report the unadjusted association between each candidate predictor and outcome.                                                                                                              | N/A       |
| Model specification          | 15a  | D              | Present the full prediction model to allow predictions for individuals (i.e., all regression coefficients, and model intercept or baseline survival at a given time point).                           | T2        |
|                              | 15b  | D              | Explain how to use the prediction model.                                                                                                                                                              | T2, S1    |
| Model performance            | 16   | D;V            | Report performance measures (with CIs) for the prediction model.                                                                                                                                      | T3, T4    |
| Model-updating               | 17   | V              | If done, report the results from any model updating (i.e., model specification, model performance).                                                                                                   | N/A       |
| <b>Discussion</b>            |      |                |                                                                                                                                                                                                       |           |
| Limitations                  | 18   | D;V            | Discuss any limitations of the study (such as nonrepresentative sample, few events per predictor, missing data).                                                                                      | 21-23     |
| Interpretation               | 19a  | V              | For validation, discuss the results with reference to performance in the development data, and any other validation data.                                                                             | 19-20     |
|                              | 19b  | D;V            | Give an overall interpretation of the results, considering objectives, limitations, results from similar studies, and other relevant evidence.                                                        | 19-20     |
| Implications                 | 20   | D;V            | Discuss the potential clinical use of the model and implications for future research.                                                                                                                 | 20-21     |
| <b>Other information</b>     |      |                |                                                                                                                                                                                                       |           |
| Supplementary information    | 21   | D;V            | Provide information about the availability of supplementary resources, such as study protocol, Web calculator, and data sets.                                                                         | N/A       |
| Funding                      | 22   | D;V            | Give the source of funding and the role of the funders for the present study.                                                                                                                         | N/A       |

\*Items relevant only to the development of a prediction model are denoted by D, items relating solely to a validation of a prediction model are denoted by V, and items relating to both are denoted D;V. We recommend using the TRIPOD Checklist in conjunction with the TRIPOD Explanation and Elaboration document. S = Supplemental material, F = Figure, T = Table.

# BMJ Open

## Development and validation of an early warning score to identify COVID-19 in the emergency department based on routine laboratory tests: a multicenter case-control study

|                                 |                                                                                                                                                                                                                                                                                                                                                                                                                                                                                                                                                                                                                                                                                                                                                                                                                                                              |
|---------------------------------|--------------------------------------------------------------------------------------------------------------------------------------------------------------------------------------------------------------------------------------------------------------------------------------------------------------------------------------------------------------------------------------------------------------------------------------------------------------------------------------------------------------------------------------------------------------------------------------------------------------------------------------------------------------------------------------------------------------------------------------------------------------------------------------------------------------------------------------------------------------|
| Journal:                        | <i>BMJ Open</i>                                                                                                                                                                                                                                                                                                                                                                                                                                                                                                                                                                                                                                                                                                                                                                                                                                              |
| Manuscript ID                   | bmjopen-2021-059111.R2                                                                                                                                                                                                                                                                                                                                                                                                                                                                                                                                                                                                                                                                                                                                                                                                                                       |
| Article Type:                   | Original research                                                                                                                                                                                                                                                                                                                                                                                                                                                                                                                                                                                                                                                                                                                                                                                                                                            |
| Date Submitted by the Author:   | 19-May-2022                                                                                                                                                                                                                                                                                                                                                                                                                                                                                                                                                                                                                                                                                                                                                                                                                                                  |
| Complete List of Authors:       | Boer, Arjen-Kars; Catharina Hospital Deneer, Ruben; Catharina Hospital, ; Eindhoven University of Technology, Maas, Maaïke; Catharina Ziekenhuis, emergency department Ammerlaan, Heidi; Catharina Hospital van Balkom, Roland; Catharina Hospital Thijssen, Wendy; Catharina ziekenhuis, Emergency medicine Bennenbroek, Sophie; Catharina Hospital Leers, Mathie; Zuyderland Medical Centre Heerlen, Clinical Chemistry & Hematology Martens, Remy; Zuyderland Medical Centre Heerlen, Clinical Chemistry & Hematology Buijs, Madelon; Atalmedial Kerremans, Jos; Alrijne Hospital Location Leiderdorp Messchaert, Muriël ; Gelre Hospitals van Suijlen, Jeroen; Gelre Hospitals van Riel, Natal; Eindhoven University of Technology, ; Amsterdam University Medical Centres Scharnhorst, Volkher; Catharina Hospital; Eindhoven University of Technology, |
| <b>Primary Subject Heading</b>: | Emergency medicine                                                                                                                                                                                                                                                                                                                                                                                                                                                                                                                                                                                                                                                                                                                                                                                                                                           |
| Secondary Subject Heading:      | Health informatics, Infectious diseases                                                                                                                                                                                                                                                                                                                                                                                                                                                                                                                                                                                                                                                                                                                                                                                                                      |
| Keywords:                       | COVID-19, STATISTICS & RESEARCH METHODS, ACCIDENT & EMERGENCY MEDICINE, Clinical chemistry < PATHOLOGY, Health informatics < BIOTECHNOLOGY & BIOINFORMATICS                                                                                                                                                                                                                                                                                                                                                                                                                                                                                                                                                                                                                                                                                                  |
|                                 |                                                                                                                                                                                                                                                                                                                                                                                                                                                                                                                                                                                                                                                                                                                                                                                                                                                              |

SCHOLARONE™  
Manuscripts



I, the Submitting Author has the right to grant and does grant on behalf of all authors of the Work (as defined in the below author licence), an exclusive licence and/or a non-exclusive licence for contributions from authors who are: i) UK Crown employees; ii) where BMJ has agreed a CC-BY licence shall apply, and/or iii) in accordance with the terms applicable for US Federal Government officers or employees acting as part of their official duties; on a worldwide, perpetual, irrevocable, royalty-free basis to BMJ Publishing Group Ltd ("BMJ") its licensees and where the relevant Journal is co-owned by BMJ to the co-owners of the Journal, to publish the Work in this journal and any other BMJ products and to exploit all rights, as set out in our [licence](#).

The Submitting Author accepts and understands that any supply made under these terms is made by BMJ to the Submitting Author unless you are acting as an employee on behalf of your employer or a postgraduate student of an affiliated institution which is paying any applicable article publishing charge ("APC") for Open Access articles. Where the Submitting Author wishes to make the Work available on an Open Access basis (and intends to pay the relevant APC), the terms of reuse of such Open Access shall be governed by a Creative Commons licence – details of these licences and which [Creative Commons](#) licence will apply to this Work are set out in our licence referred to above.

Other than as permitted in any relevant BMJ Author's Self Archiving Policies, I confirm this Work has not been accepted for publication elsewhere, is not being considered for publication elsewhere and does not duplicate material already published. I confirm all authors consent to publication of this Work and authorise the granting of this licence.

1  
2  
3  
4 1 **Development and validation of an early warning score to identify**  
5  
6 2 **COVID-19 in the emergency department based on routine laboratory**  
7  
8  
9 3 **tests: a multicenter case-control study**  
10  
11  
12 4

15 5 Arjen-Kars Boer<sup>1\*</sup>, Ruben Deneer<sup>1,2\*†</sup>, Maaïke Maas<sup>3</sup>, Heidi S. M. Ammerlaan<sup>4</sup>, Roland H. H.  
16  
17 6 van Balkom<sup>5</sup>, Wendy A.M.H. Thijssen<sup>3</sup>, Sophie Bennenbroek<sup>3</sup>, Mathie P. G. Leers<sup>6</sup>, Remy  
18  
19 7 J.H. Martens<sup>6</sup>, Madelon M. Buijs<sup>7</sup>, Jos J. Kerremans<sup>8</sup>, Muriël Messchaert<sup>9</sup>, Jeroen D.E. van  
20  
21  
22 8 Suijlen<sup>9</sup>, Natal A.W. van Riel<sup>2,10</sup> and Volkher Scharnhorst<sup>1,2</sup>  
23  
24  
25 9

26  
27  
28 10 \* Both authors contributed equally  
29

30  
31 11 † Corresponding author  
32  
33  
34 12

35  
36  
37 13 1 Department of Laboratory Medicine, Catharina Hospital Eindhoven,  
38  
39 14 Michelangelolaan 2, 5623 EJ, Eindhoven, the Netherlands

40  
41 15 2 Faculty of Biomedical Engineering, Technical University Eindhoven, Groene  
42  
43 16 Loper 3, 5612 AE, Eindhoven, the Netherlands

44  
45  
46 17 3 Department of Emergency Medicine, Catharina Hospital Eindhoven,  
47  
48 18 Michelangelolaan 2, 5623 EJ, Eindhoven, the Netherlands

49  
50 19 4 Department of Internal Medicine, Catharina Hospital Eindhoven,  
51  
52 20 Michelangelolaan 2, 5623 EJ, Eindhoven, the Netherlands

53  
54  
55 21 5 Department of Pulmonary Diseases, Catharina Hospital Eindhoven,  
56  
57 22 Michelangelolaan 2, 5623 EJ, Eindhoven, the Netherlands  
58  
59  
60

- 1  
2  
3 23 6 Department of Laboratory Medicine, Zuyderland Medical Center, Dr. H. van der  
4  
5 24 Hoffplein 1, 6162 BG, Sittard-Geleen, the Netherlands  
6  
7 25 7 Atalmedial Diagnostic Centers, Jan Tooropstraat 138, 1061 AD Amsterdam, the  
8  
9 26 Netherlands  
10  
11  
12 27 8 Department of Medical Microbiology & Infection Prevention, Alrijne Hospital,  
13  
14 28 Simon Smitweg 1, 2353 GA Leiderdorp, the Netherlands  
15  
16  
17 29 9 Department of Clinical Chemistry, Gelre Hospital, Albert Schweitzerlaan 31, 7334  
18  
19 30 DZ Apeldoorn, the Netherlands  
20  
21 31 10 Amsterdam University Medical Centers, University of Amsterdam, Meibergdreef  
22  
23 32 9, 1105 AZ Amsterdam, the Netherlands.  
24  
25  
26  
27 33  
28  
29

### 30 **Keywords**

31  
32 35 COVID-19, SARS-CoV-2, emergency department, triage, early warning score, prediction  
33  
34 36 model, routine laboratory tests  
35  
36  
37  
38 37  
39

### 40 **Corresponding author**

41 38  
42  
43 39 Ruben Deneer  
44  
45  
46 40 Michelangelolaan 2  
47  
48  
49 41 5623 EJ Eindhoven, the Netherlands  
50  
51  
52 42 [ruben.deneer@catharinaziekenhuis.nl](mailto:ruben.deneer@catharinaziekenhuis.nl)  
53  
54  
55  
56  
57  
58  
59  
60

## 43 Abstract

44 **Objectives:** Identifying patients with a possible SARS-CoV-2 infection in the emergency  
45 department (ED) is challenging. Symptoms differ, incidence rates vary and test capacity may  
46 be limited. As PCR testing all ED patients is neither feasible nor effective in most centers, a  
47 rapid, objective, low-cost early warning score to triage ED patients for a possible infection is  
48 developed.

49 **Design:** Case-control study.

50 **Setting:** Secondary and tertiary hospitals in the Netherlands.

51 **Participants:** Patients presenting at the ED with venous blood sampling from July 2019 to  
52 July 2020 (N = 10417, 279 SARS-CoV-2 positive). The temporal validation cohort covered  
53 the period from July 2020 to October 2021 (N = 14080, 1093 SARS-CoV-2 positive). The  
54 external validation cohort consisted of patients presenting at the ED of three hospitals in the  
55 Netherlands (N = 12061, 652 SARS-CoV-2 positive).

56 **Primary outcome measures** The primary outcome was one or more positive SARS-CoV-2  
57 PCR-test results, within one day prior to, or one week after, ED presentation.

58 **Results:** The resulting “CoLab-score” consists of 10 routine laboratory measurements, and  
59 age. The score showed good discriminative ability (AUC: 0.930, 95% CI: 0.909 to 0.945).  
60 The lowest CoLab-score had a high sensitivity for COVID-19 (0.984, 95% CI: 0.970 to 0.991,  
61 specificity: 0.411, 95% CI: 0.285 to 0.520). Conversely, the highest score had high specificity  
62 (0.978, 95% CI: 0.973 to 0.983, sensitivity: 0.608, 95% CI: 0.522 to 0.685). Results were  
63 confirmed in temporal and external validation.

64 **Conclusions:** The CoLab-score is based on routine laboratory measurements and is available  
65 within one hour after presentation. Depending on the prevalence, COVID-19 may be safely

1  
2  
3 66 ruled-out in over one third of ED presentations. Highly suspect cases can be identified  
4  
5 67 regardless of presenting symptoms. The CoLab-score is continuous, in contrast to the binary  
6  
7 68 outcome of lateral flow testing, and can guide PCR testing and triage ED patients.  
8  
9

10  
11 69

## 12 13 14 70 **Article summary**

### 15 16 17 71 Strengths and limitations of this study

- 18  
19 72 • A comprehensive panel of 28 laboratory tests was measured for 10.417 emergency  
20  
21 73 department (ED) presentations and combined with SARS-CoV-2 PCR test results.
- 22  
23 74 • Using adaptive lasso regression analysis, the panel of 28 laboratory tests was reduced  
24  
25 75 to a single score consisting of a subset of 10 routine ED laboratory tests and age.
- 26  
27 76 • The score was temporally validated from July 2020 to October 2021, in the presence of  
28  
29 77 vaccine roll-out and emergence of new SARS-CoV-2 variants.
- 30  
31 78 • The score was externally validated in 3 other centers in the Netherlands.
- 32  
33 79 • Missingness in the panel of laboratory tests varied between external centers, limiting  
34  
35 80 generalizability of the score to the ED population for which the complete panel of  
36  
37 81 laboratory tests was available.
- 38  
39 82 • The score was not directly compared to lateral flow testing.  
40  
41  
42  
43  
44  
45  
46  
47  
48  
49  
50  
51  
52  
53  
54  
55  
56  
57  
58  
59  
60

## 84 Introduction

85 COVID-19, caused by the severe acute respiratory syndrome coronavirus 2 (SARS-CoV-2),  
86 has evolved into a global pandemic in 2020 [1]. For emergency department (ED) physicians,  
87 identifying presenting patients with a possible COVID-19 infection remains challenging since  
88 symptoms like fever, shortness of breath or coughing overlap with other illnesses [2,3]. It is  
89 crucial however, to identify a possible COVID-19 infection as early as possible. Early  
90 identification prevents further spreading and protects hospital staff by isolating a suspected  
91 patient, pending the results of a SARS-COV-2 RNA PCR test and/or chest CT. Conversely,  
92 when PCR testing or isolation treatment capacity is limited, ruling-out COVID-19 as soon as  
93 possible can save valuable resources.

94 In the era of electronic health records and clinical prediction models, developing an early  
95 warning score that can assist ED physicians in identifying patients presenting at the ED with  
96 COVID-19 is of great value. Moreover, if only routine ED test results are required as input,  
97 the score can be easily adopted by EDs worldwide, potentially reduce diagnostic costs and  
98 accelerate patient triage.

99 Many COVID-19 prediction models have already been developed, the living systematic  
100 review by Wynants et. al [4] provides an extensive overview and critical appraisal.

101 Unfortunately, only few models have found their way into routine care at the ED [5,6]. Early  
102 models were based on relatively small sample sizes, hampered by selection bias or were over-  
103 fitted by selecting too many features [4–6]. Aside from methodological shortcomings of early  
104 models, most models are not developed as an early warning score for all ED patients. Firstly,  
105 they require features from tests that are not routinely performed or logged for all ED patients  
106 (e.g. the CO-RADS score from a CT-scan [7] or non-lab based clinical variables in the  
107 PRIEST EWS [8]) and are therefore not straightforward to implement or scale to a large ED  
108 patient population. Secondly, the population on which models are commonly based, are PCR-



1  
2  
3 109 tested patients, i.e. a pre-selection of a possible COVID-19 infection has already been done by  
4  
5 110 physicians.

7 111 Only two studies were identified that focus on patients presenting at the ED, include  
8  
9  
10 112 unsuspected (and pre-pandemic) patients as controls, and rely solely on routine (laboratory)  
11  
12 113 tests [9,10].

15 114 In this study we report the development and validation of an early warning score that, based  
16  
17 115 on routine ED laboratory tests, estimates the risk of a possible COVID-19 infection in patients  
18  
19 116 who undergo routine laboratory testing at presentation. The score can assist ED physicians in  
20  
21 117 triaging patients and prevent further transmission of COVID-19 by quickly identifying  
22  
23  
24 118 possibly infected patients or ruling out a possible infection when resources are scarce.  
25  
26  
27  
28  
29  
30  
31  
32  
33  
34  
35  
36  
37  
38  
39  
40  
41  
42  
43  
44  
45  
46  
47  
48  
49  
50  
51  
52  
53  
54  
55  
56  
57  
58  
59  
60

## 119 **Methods**

### 120 *Study design*

121 This is a retrospective case-control study where routine laboratory test results, combined with  
122 age and gender, from all patient presenting at the emergency department (ED) of the  
123 Catharina Hospital Eindhoven from July 2019 to July 2020 were combined with SARS-CoV-  
124 2 PCR test results in a development dataset. A model that could predict the presence of a  
125 COVID-19 infection was fit to this dataset. Performance of the model was assessed by i)  
126 internal validation, ii) temporal validation and iii) external validation by using data from the  
127 ED of three other centers. The study was reviewed by the Medical research Ethics  
128 Committees United (MEC-U) under study number W20.071, which confirmed that the  
129 Medical Research Involving Human Subjects Act (In Dutch: WMO) does not apply to this  
130 study. The study was thereafter reviewed and approved by the internal hospital review board.

131

### 132 *Patient and Public Involvement*

133 Patients were not involved in the design, conduct or reporting of this study.

134

### 135 *Development dataset*

136 All ED presentations at the Catharina Hospital Eindhoven from July 2019 to July 2020 were  
137 included in the development dataset, provided that routine laboratory testing had been  
138 requested by the attending ED physician. The rationale for this inclusion period is to limit the  
139 effect of seasonal variation in the ED patient population by including the summer, fall and  
140 winter season of 2019 (control patients) and the winter, spring and summer season of 2020  
141 (case and control patients). The routine laboratory panel at the ED consists of 28 laboratory  
142 tests. In some cases not all tests in the routine panel were requested or one or more

1  
2  
3 143 quantitative results were not available due to analytical interference (hemolysis, lipemia or  
4  
5 144 icterus). The routine ED laboratory panel is requested for (adult) patients presenting with  
6  
7 145 abdominal pain, chest pain, shortness of breath, syncope, sepsis or other non-specific  
8  
9 146 complaints, or for patients (including non-adult patients) presenting with specific complaints  
10  
11 147 where a suspected diagnosis has to be ruled-in or ruled-out. Presentations with one or more  
12  
13 148 missing values in any of the 28 laboratory test in the routine ED panel, were excluded.  
14  
15 149 Presentations with one or more extreme lab results, > 10 times standard deviation from the  
16  
17 150 median, were also excluded to minimize the effect on the estimation of regression  
18  
19 151 coefficients. The median was chosen as a measure of central tendency due to its resistance for  
20  
21 152 outliers. After the first case of COVID-19 in the Netherlands, all patients with symptoms of  
22  
23 153 COVID-19 (either fever and/or respiratory symptoms) were subjected to nasopharyngeal PCR  
24  
25 154 testing for SARS-CoV-2 RNA. PCR testing was performed by commercial tests that were  
26  
27 155 approved by the Dutch national institute of public health (RIVM). If a patient had a positive  
28  
29 156 PCR result in the past, subsequent presentations were excluded as re-presentations might be  
30  
31 157 clinically different from de novo presentations.  
32  
33  
34  
35  
36  
37  
38 158 The ED lab panel results were matched to SARS-CoV-2 PCR results if the underlying  
39  
40 159 nasopharyngeal swab had been taken  $\leq 1$  day prior, or  $\leq 1$  week after initial blood withdrawal  
41  
42 160 at the ED. If multiple PCR tests were performed in this window, and at least one PCR test was  
43  
44 161 positive, the presentation was labelled "*PCR-positive*". If all PCR test results in the time  
45  
46 162 window were negative, the presentation was labelled as "*PCR-negative*". If no PCR tests were  
47  
48 163 performed in the time window and the presentation occurred after the first case of COVID-19  
49  
50 164 in the Netherlands, the presentation was labelled as "*Untested*". All presentations before the  
51  
52 165 first case were labelled as "*Pre-COVID-19*".  
53  
54  
55  
56  
57  
58  
59  
60

## 167 *Laboratory tests*

168 The routine laboratory panel consisted of hemocytometric and chemical analyses. The  
169 hemocytometric tests were performed on Sysmex XN-10 instruments (Sysmex Corp., Kobe,  
170 Japan) and consisted of hemoglobin, hematocrit, erythrocytes, mean corpuscular volume  
171 (MCV), mean cellular hemoglobin (MCH), mean cellular hemoglobin concentration  
172 (MCHC), thrombocytes, leukocytes, neutrophils, eosinophils, basophils, lymphocytes and  
173 monocytes. The chemical analyses were performed on a Cobas 8000 Pro (Roche Dx, Basel,  
174 Switzerland) instrument and consisted of glucose, total bilirubin, aspartate aminotransferase  
175 (ASAT), alanine aminotransferase (ALAT), lactate dehydrogenase (LD), creatine kinase  
176 (CK), alkaline phosphatase (ALP), gamma-glutamyltransferase (gGT), blood urea nitrogen  
177 (BUN), creatinine, CKD-epi estimated glomerular filtration rate (eGFR), potassium, sodium,  
178 chloride, albumin (bromocresol green) and C-reactive protein (CRP). These results were  
179 combined with age and gender.

## 181 *Modelling*

182 All data were processed and analyzed in R version 4.1.1 [11]. Laboratory results, combined  
183 with age and gender were used as covariates in a regression model. Cases were defined as ED  
184 presentations labelled as “*PCR-positive*”, controls were all other presentations (i.e. “*PCR-*  
185 *negative*”, “*Untested*” or “*Pre-COVID-19*”). To achieve predictive accuracy, limit overfitting  
186 and perform feature selection, penalized logistic regression with an adaptive lasso penalty was  
187 chosen [12,13]. To minimize missing data, all non-numeric results at the extremes of the  
188 measuring range, were converted to numeric results by removing the “<” and “>” signs. For  
189 eGFR (CKD-epi) and CRP the raw precursor value was used instead of >90 ml/min/m<sup>2</sup> and  
190 <6 mg/L, respectively. Considering that laboratory results of bilirubin, ASAT, ALAT, LD,  
191 CK, ALP and gGT can have heavy (right) tailed distributions, which in turn impacts model

1  
2  
3 192 predictions, these variables were transformed logarithmically. More details regarding model  
4  
5 193 fitting can be found in the document, **Supplemental Material 1**. Models were fitted using the  
6  
7 194 glmnet-package [14].  
8  
9

10  
11 195

### 12 13 196 *CoLab-score*

14  
15  
16 197 Since this is a retrospective case-control study, the sample prevalence may not reflect the  
17  
18 198 true/current COVID-19 prevalence. To obtain well-calibrated probabilities the intercept term  
19  
20 199 in the model should be adjusted according to the current prevalence (details can be found in  
21  
22 200 the document, **Supplemental Material 1**) [15]. However, adjusting the intercept term is not  
23  
24 201 straightforward to implement in clinical practice, therefore the linear predictor of the model  
25  
26 202 was categorized into a score, this score is hereafter referred to as the “CoLab-score”. The  
27  
28 203 categorization is based on a number needed to test of 15 (i.e. one is willing to PCR test 15  
29  
30 204 patients to find one positive) and prevalence cut-points of 1%, 2%, 5%, 10% and 40% using  
31  
32 205 the intercept adjustment formula by King [15]. The intervals obtained through these breaks  
33  
34 206 correspond to CoLab-scores 5 to 0, respectively. Score 0 reflects low-risk for COVID-19 and  
35  
36 207 score 5 reflects high-risk. More details regarding the rationale of the CoLab-score  
37  
38 208 categorization can be found in the document, **Supplemental Material 1**.  
39  
40  
41  
42  
43

44 209

### 45 46 47 210 *Internal validation*

48  
49 211 To assess model performance while taking overfitting into account, bootstrapping was  
50  
51 212 performed. 1000 bootstrap samples were generated from the original data. On each bootstrap  
52  
53 213 sample, the full model fitting procedure and CoLab-score conversion were performed.  
54  
55 214 Optimism adjusted performance measures of the CoLab-score were obtained by applying the  
56  
57 215 0.632 bootstrap rule to the in-sample and out-of-bag-sample performance [16]. Performance  
58  
59  
60

1  
2  
3 216 measures included, AUC, sensitivity, specificity, positive predictive value (PPV) and negative  
4  
5 217 predictive value (NPV) of each CoLab-score. The pROC-package was used to calculate  
6  
7 218 performance measures [17]. Although the full inclusion period from July 2019 to July 2020  
8  
9 219 was used for model fitting, the performance was evaluated on the period starting from the first  
10  
11 220 COVID-19 infection (24<sup>th</sup> of February 2020) to July 2020. This was done to obtain  
12  
13 221 performance measures that would reflect real world performance.  
14  
15  
16  
17  
18  
19

### 20 223 *Temporal validation*

21  
22  
23 224 For temporal validation, results from our center were prospectively analyzed from July 2020  
24  
25 225 to October 2021. During this period, the Netherlands was struck by a second wave of COVID-  
26  
27 226 19 infections, starting in the fall of 2020 and subsiding in the summer of 2021. In this period  
28  
29 227 there was also more widespread external PCR testing by municipal health services. The  
30  
31 228 results of external conducted PCR tests were not available to our study. To overcome this  
32  
33 229 limitation, the outcome in the temporal validation cohort was chosen as a composite of the  
34  
35 230 hospital registration of a confirmed COVID-19 infection and/or at least one positive PCR test  
36  
37 231 result. This period also covers both the emergence of new SARS-CoV-2 variants as well as  
38  
39 232 vaccine rollout. However, neither vaccination status nor genomic sequencing was available to  
40  
41 233 determine whether a patient was vaccinated or which variant caused the infection. Therefore,  
42  
43 234 data from the Dutch national institute of public health (RIVM) was used, to divide the  
44  
45 235 temporal validation period into three phases: i) from July 2020 until March 2021, no  
46  
47 236 vaccination and no variants of concern identified ii) from March 2021 until June 2021, partial  
48  
49 237 vaccination and B.1.1.7 (Alpha) variant identified as dominant iii) from June 2021 until  
50  
51 238 October 2021, widespread vaccination and B.1.617.2 (Delta) variant identified as dominant.  
52  
53 239 See **Supplemental Material 2 Figure 1** for more details. The temporal validation consisted  
54  
55 240 of assessing the AUC, sensitivity, specificity, PPV and NPV of each CoLab-score threshold  
56  
57  
58  
59  
60

1  
2  
3 241 for the entire period, as well as for each phase separately to determine a possible effect of  
4  
5 242 vaccination and new variants on performance (results in the **Supplemental Material 2**).  
6  
7 243 Model calibration was assessed graphically using the rms-package [18].  
8  
9

10 244

11  
12  
13 245 *External validation*

14  
15 246 For the external validation, several centers in the Netherlands were approached and assessed  
16  
17 247 if the required panel of laboratory tests and SARS-CoV-2 PCR test results were available.  
18  
19 248 Seven centers responded and three centers fulfilled the inclusion criteria: Gelre Hospitals  
20  
21 249 (center 1), Atalmedial Diagnostic Centers, location Alrijne Hospital Leiderdorp (center 2) and  
22  
23 250 Zuyderland Medical Center (center 3). The hematological parameters were measured with  
24  
25 251 Sysmex XN10/XN20 (center 1), CELL-DYN-Sapphire (Abbott Laboratories) (center 2) and  
26  
27 252 Sysmex XN10 instruments (center 3). The clinical chemistry parameters were measured with  
28  
29 253 Architect c14100/c160000 (Abbott Laboratories) (center 1), Architect ci4100 (Abbott  
30  
31 254 Laboratories) (center 2) and Cobas 8000 instruments (Roche Dx) (center 3). The external  
32  
33 255 validation was similar to the temporal validation and consisted of assessing the AUC  
34  
35 256 sensitivity, specificity, PPV and NPV of each CoLab-score threshold. Calibration was  
36  
37 257 assessed graphically analogous to the temporal validation dataset.  
38  
39  
40  
41  
42  
43  
44  
45  
46  
47  
48  
49  
50  
51  
52  
53  
54  
55  
56  
57  
58  
59  
60

## 258 Results

### 259 Development dataset

260 12879 emergency department (ED) presentations of 10327 patients from July 2019 to July  
 261 2020 were included. After excluding cases with an incomplete lab panel, patient presentations  
 262 that occurred after a positive PCR test in the past (re-presentations) and presentations with  
 263 extreme values (>10 times standard deviation) in any of the lab results, 10417 presentations of  
 264 8610 patients remained (**Figure 1 A**).

|                      | <b>Pre-COVID<br/>N = 5890</b> | <b>Untested<br/>N = 3303</b> | <b>PCR negative<br/>N = 945</b> | <b>PCR positive<br/>N = 279</b> |
|----------------------|-------------------------------|------------------------------|---------------------------------|---------------------------------|
| Age in years         | 61 (21)                       | 60 (21)                      | 66 (18)                         | 69 (15)                         |
| Female gender        | 2909 (49.4 %)                 | 1659 (50.2 %)                | 466 (49.3 %)                    | 95 (34.1 %)                     |
| Specialism           |                               |                              |                                 |                                 |
| Internal medicine    | 1648 (28.0 %)                 | 896 (27.1 %)                 | 244 (25.8 %)                    | 71 (25.4 %)                     |
| Surgery              | 1007 (17.1 %)                 | 679 (20.6 %)                 | 51 (5.4 %)                      | 5 (1.8 %)                       |
| Neurology            | 775 (13.2 %)                  | 468 (14.2 %)                 | 64 (6.8 %)                      | 5 (1.8 %)                       |
| Pulmonary medicine   | 714 (12.1 %)                  | 220 (6.7 %)                  | 326 (34.5 %)                    | 167 (59.9 %)                    |
| Cardiology           | 560 (9.5 %)                   | 322 (9.7 %)                  | 145 (15.3 %)                    | 6 (2.2 %)                       |
| Urology              | 309 (5.2 %)                   | 148 (4.5 %)                  | 15 (1.6 %)                      | 7 (2.5 %)                       |
| Gastroenterology     | 306 (5.2 %)                   | 224 (6.8 %)                  | 27 (2.9 %)                      | 1 (0.4 %)                       |
| Geriatrics           | 189 (3.2 %)                   | 95 (2.9 %)                   | 52 (5.5 %)                      | 15 (5.4 %)                      |
| Orthopedics          | 147 (2.5 %)                   | 109 (3.3 %)                  | 11 (1.2 %)                      | 0 (0.0 %)                       |
| Gynecology           | 118 (2.0 %)                   | 82 (2.5 %)                   | 2 (0.2 %)                       | 0 (0.0 %)                       |
| Other                | 117 (2.0 %)                   | 60 (1.8 %)                   | 8 (0.8 %)                       | 2 (0.7 %)                       |
| Hemoglobin in mmol/L | 8.2 (1.3)                     | 8.3 (1.3)                    | 8.2 (1.4)                       | 8.6 (1.1)                       |
| Hematocrit in L/L    | 0.403 (0.059)                 | 0.405 (0.056)                | 0.405 (0.062)                   | 0.417 (0.047)                   |
| Erythrocytes in /pL  | 4.41 (0.69)                   | 4.43 (0.66)                  | 4.41 (0.72)                     | 4.61 (0.60)                     |
| MCV in fl            | 91.8 (6.4)                    | 91.9 (6.1)                   | 92.4 (6.7)                      | 90.7 (5.5)                      |
| MCH in mmol          | 1.859 (0.157)                 | 1.876 (0.150)                | 1.874 (0.172)                   | 1.869 (0.141)                   |
| MCHC in mmol/L       | 20.2 (0.9)                    | 20.4 (0.9)                   | 20.3 (1.0)                      | 20.6 (0.8)                      |
| Thrombocytes in /nL  | 263 (99)                      | 266 (100)                    | 269 (105)                       | 217 (123)                       |
| Leukocytes in /nL    | 9.30 [7.06, 12.16]            | 8.92 [7.01, 11.89]           | 9.66 [7.17, 12.94]              | 6.33 [4.74, 8.48]               |
| Neutrophils in /nL   | 6.62 [4.51, 9.53]             | 6.10 [4.42, 8.94]            | 7.01 [4.79, 10.02]              | 4.71 [3.30, 6.94]               |
| Eosinophils in /nL   | 0.09 [0.03, 0.17]             | 0.09 [0.03, 0.18]            | 0.08 [0.02, 0.17]               | 0.00 [0.00, 0.02]               |
| Basophils in /nL     | 0.04 [0.02, 0.05]             | 0.04 [0.02, 0.05]            | 0.04 [0.02, 0.05]               | 0.01 [0.01, 0.02]               |
| Lymphocytes in /nL   | 1.47 [0.93, 2.13]             | 1.56 [1.05, 2.18]            | 1.31 [0.80, 2.03]               | 0.86 [0.59, 1.21]               |
| Monocytes in /nL     | 0.70 [0.52, 0.93]             | 0.69 [0.52, 0.91]            | 0.74 [0.54, 1.01]               | 0.45 [0.32, 0.64]               |
| Glucose in mmol/L    | 6.76 [5.83, 8.39]             | 6.68 [5.76, 8.14]            | 6.98 [5.95, 8.85]               | 6.77 [5.98, 8.48]               |
| Bilirubin in umol/L  | 7.5 [5.0, 11.6]               | 7.4 [5.1, 10.9]              | 8.3 [5.6, 12.4]                 | 8.2 [6.3, 11.4]                 |
| ASAT in U/L          | 24.0 [19.1, 32.2]             | 26.5 [21.6, 35.1]            | 27.7 [21.7, 39.2]               | 40.7 [30.2, 57.2]               |
| ALAT in U/L          | 24.3 [17.8, 35.3]             | 25.3 [18.4, 36.2]            | 25.7 [18.4, 40.0]               | 33.7 [23.3, 50.0]               |
| LD in U/L            | 201 [173, 240]                | 198 [170, 236]               | 215 [178, 263]                  | 300 [238, 403]                  |
| CK in U/L            | 82 [51, 134]                  | 83 [52, 136]                 | 76 [51, 125]                    | 124 [62, 222]                   |
| ALP in IU/L          | 83.0 [68.0, 105.0]            | 81.0 [65.8, 102.5]           | 86.9 [67.9, 110.0]              | 71.0 [58.8, 85.0]               |
| gGT in U/L           | 27.0 [17.0, 53.0]             | 28.4 [18.4, 50.5]            | 37.0 [22.4, 68.9]               | 42.0 [28.0, 83.5]               |
| BUN in mmol/L        | 5.7 [4.3, 8.0]                | 5.8 [4.3, 7.8]               | 6.2 [4.6, 9.4]                  | 6.1 [4.7, 8.9]                  |



|                                  |                   |                    |                   |                   |
|----------------------------------|-------------------|--------------------|-------------------|-------------------|
| CKD-epi in ml/min/m <sup>2</sup> | 80.9 [58.0, 99.1] | 85.0 [63.5, 103.3] | 79.1 [52.1, 96.6] | 76.6 [54.9, 91.2] |
| Potassium in mmol/L              | 4.06 (0.50)       | 4.03 (0.49)        | 4.07 (0.55)       | 3.91 (0.47)       |
| Sodium in mmol/L                 | 139.2 (4.0)       | 138.5 (3.9)        | 138.0 (4.3)       | 136.4 (4.1)       |
| Chloride in mmol/L               | 104.4 (4.6)       | 103.8 (4.5)        | 102.9 (4.8)       | 101.6 (4.4)       |
| Albumin in g/L                   | 42.4 (4.9)        | 42.3 (4.5)         | 40.8 (4.8)        | 38.4 (3.8)        |
| CRP in mg/L                      | 8 [2, 41]         | 5 [1, 30]          | 18 [3, 69]        | 77 [37, 136]      |

265

266 **Table 1: Descriptive statistics of development dataset and laboratory concentrations.**

267 *Shown are the laboratory tests routinely requested at ED presentation and their mean/median*  
 268 *results (in the development dataset) for the presentations before the first COVID-19 patient in*  
 269 *the Netherlands (“Pre-COVID-19”), presentations thereafter that were not tested for*  
 270 *COVID-19 (“Untested”), tested negatively (“PCR negative”) and tested positive (“PCR*  
 271 *positive”). For results with normal distributions, the mean value and standard deviation (in*  
 272 *round brackets) are shown. For results that have skewed or heavy tailed distributions, the*  
 273 *median value and the interquartile range is shown [in squared brackets]. Dark grey marked*  
 274 *figures indicate a clinically relevant difference from the Pre-COVID-19 category (based on*  
 275 *the total allowable error).*

276

277 Descriptive statistics of ED presentations are shown in **Table 1**, dark grey marked figures  
 278 indicate a clinically relevant difference from the Pre-COVID-19 category (based on the total  
 279 allowable error [19]). For the PCR positives (N = 279), 91% (95% CI: 88 to 94%) of the cases  
 280 were tested positive in their first PCR. The remaining 24 patients were positive in their second  
 281 (N = 18), third (N = 5) or fourth (N = 1) PCR.

282

283 **CoLab-score**

284 The model obtained through adaptive lasso regression contained eleven variables, which are  
 285 depicted with their regression coefficients (weights) in **Table 2**.

| Variable                                      | $\beta$  | Exclusion limit            | Relative importance |
|-----------------------------------------------|----------|----------------------------|---------------------|
| Intercept                                     | -6.885   |                            | -                   |
| Erythrocytes /pL                              | 0.9379   | Erythrocytes < 2.9 /pL     | 52 %                |
| Leukocytes /nL                                | -0.1298  |                            | 46 %                |
| Eosinophils /nL                               | -6.834   |                            | 86 %                |
| Basophils /nL                                 | -47.70   | Basophils >0.33 /nL        | 100 %               |
| log <sub>10</sub> of Bilirubin in $\mu$ mol/L | -1.142   | Bilirubin >169 $\mu$ mol/L | 26 %                |
| log <sub>10</sub> of LD in U/L                | 5.369    | LD >1564 U/L               | 58 %                |
| log <sub>10</sub> of ALP in IU/L              | -3.114   | AF >1000 IU/L              | 45 %                |
| log <sub>10</sub> of gGT in U/L               | 0.3605   | gGT >1611 U/L              | 11 %                |
| Albumin in g/L                                | -0.1156  |                            | 45 %                |
| CRP in mg/L                                   | 0.002560 |                            | 15 %                |
| Age in years                                  | 0.002275 |                            | 4 %                 |

286

### 287 Table 2: Calculation of the CoLab-linear predictor (LP).

288 *The CoLab-linear predictor (LP) is calculated by summing the intercept and the products of*

289 *the 11 variables with their corresponding coefficients ( $\beta$ 's). CoLab-LP = - 6.885 +*

290 *[erythrocytes]  $\times$  0.9379 - [leukocytes]  $\times$  0.1298 - [eosinophils]  $\times$  6.834 - [basophils]  $\times$*

291 *47.7 - log<sub>10</sub>([bilirubin])  $\times$  1.142 + log<sub>10</sub>([LD])  $\times$  5.369 - log<sub>10</sub>([ALP])  $\times$  3.114 +*

292 *log<sub>10</sub>([gGT])  $\times$  0.3605 - [albumin]  $\times$  0.1156 + [CRP]  $\times$  0.02560 + [age]  $\times$  0.002275. The*

293 *LP can be converted into a CoLab-score (see Figure 2) or into a probability if the prevalence*

294 *is known or estimated (see details in Supplemental Material 1). The CoLab-score is not valid*

295 *if any of the variables exceed the limits in the third column. The relative importance ranks the*

296 *importance of variables in predicting the outcome, relative to the most important variable (in*

297 *this case basophils).*

298

299 A larger  $\beta$ -coefficient does not imply that a variable is more important in predicting the odds

300 of testing positive for SARS-CoV-2, since variables are on different scales. The most

301 important variables are basophiles, eosinophils and lactate dehydrogenase (LD).

302 As shown in **Figure 2**, the linear predictor clearly discriminates between COVID-19 and non-  
 303 COVID-19. The linear predictor is converted to CoLab-scores 0 – 5 with the cut-points  
 304 depicted in **Figure 2**.

305

### 306 *Internal validation*

307 The model was validated in the period starting from the first COVID-19 infection to July  
 308 2020, in this period the mean prevalence was 7.2%. The AUC of the CoLab-score is 0.930  
 309 (95% CI: 0.909 to 0.945).

| CoLab-score | Sensitivity              | Specificity              | PPV                      | NPV                      | TP                       | TN                          | FP                          | FN                      | % of population       |
|-------------|--------------------------|--------------------------|--------------------------|--------------------------|--------------------------|-----------------------------|-----------------------------|-------------------------|-----------------------|
| 0           | 0.984<br>(0.969 - 0.991) | 0.410<br>(0.302 - 0.543) | 0.115<br>(0.094 - 0.147) | 0.997<br>(0.993 - 0.999) | 273.4<br>(241.2 - 304.4) | 1470.9<br>(1081.1 - 1950.9) | 2119.1<br>(1633.5 - 2507.6) | 4.6<br>(2.6 - 8.6)      | 38.0<br>(28.0 - 51.0) |
| ≤ 1         | 0.912<br>(0.892 - 0.952) | 0.785<br>(0.741 - 0.827) | 0.248<br>(0.207 - 0.300) | 0.991<br>(0.989 - 0.995) | 253.5<br>(226.5 - 287.0) | 2817.1<br>(2655.4 - 2961.2) | 772.9<br>(623.2 - 934.5)    | 24.5<br>(13.4 - 30.2)   | 73.3<br>(69.3 - 77.3) |
| ≤ 2         | 0.856<br>(0.816 - 0.895) | 0.880<br>(0.864 - 0.900) | 0.357<br>(0.315 - 0.415) | 0.988<br>(0.984 - 0.991) | 238.1<br>(209.6 - 267.9) | 3160.8<br>(3100.7 - 3233.7) | 429.1<br>(357.3 - 487.1)    | 39.9<br>(28.5 - 52.4)   | 82.9<br>(80.9 - 83.9) |
| ≤ 3         | 0.757<br>(0.706 - 0.809) | 0.951<br>(0.944 - 0.959) | 0.546<br>(0.496 - 0.604) | 0.981<br>(0.976 - 0.985) | 210.4<br>(183.4 - 240.2) | 3415.1<br>(3378.0 - 3456.4) | 174.9<br>(147.0 - 199.3)    | 67.6<br>(51.9 - 84.9)   | 90.0<br>(89.0 - 91.0) |
| ≤ 4         | 0.612<br>(0.530 - 0.706) | 0.978<br>(0.972 - 0.983) | 0.683<br>(0.628 - 0.746) | 0.970<br>(0.963 - 0.978) | 170.2<br>(141.6 - 204.9) | 3510.6<br>(3476.8 - 3547.5) | 79.4<br>(60.3 - 100.4)      | 107.9<br>(79.1 - 134.0) | 93.7<br>(91.7 - 93.7) |

310

### 311 **Table 3: Bootstrapped diagnostic performance of the CoLab-score in the development** 312 **dataset.**

313 *The development dataset was internally validated for the period March 2020 – July 2020 (N*  
 314 *= 3868). The optimism-adjusted bootstrapped sensitivities, specificities, positive predictive*  
 315 *values (PPV), negative predictive values (NPV), true positives (TP), true negatives (TN), false*  
 316 *positives (FP) and false negatives (FN) and fraction of presentations (%) are shown for fixed*  
 317 *cut-offs (CoLab-score 0 till ≤ 4). The numbers in round brackets represent the 95% optimism-*

1  
2  
3 318 *adjusted bootstrapped confidence intervals. The first column defines the threshold above*  
4  
5 319 *which CoLab-score a patient is considered positive. Note that “0” lists the sensitivity and*  
6  
7 320 *NPV of CoLab-score 0 and “≤ 4” lists the specificity and PPV of CoLab-score 5. Also note*  
8  
9 321 *that TP, TN, FP and FN are not whole numbers, as these are obtained through bootstrapping*  
10  
11 322 *and each bootstrap replicate contains a different number of controls and cases.*  
12  
13  
14

15 323

16  
17  
18 324 Diagnostic performance is shown in **Table 3**. A CoLab-score of 0 has a negative predictive  
19  
20 325 value (NPV) of 0.997 (95% CI: 0.993 to 0.999) and positive predictive value (PPV) of 0.115  
21  
22 326 (0.0934 - 0.147), one third (38%, 95% CI: 28 to 514%) of all ED presentations were assigned  
23  
24 327 this score and can therefore be safely excluded. Conversely, 6% (95% CI: 6 to 8%) of the ED  
25  
26 328 patients had a CoLab-score = 5. Given the PPV of this score (0.683, 95% CI: 0.628 to 0.746,  
27  
28 329 NPV: 0.970, 95% CI: 0.963 - 0.978), subsequent PCR testing is advised.  
29  
30  
31

32 330

### 33 331 *Temporal validation*

34  
35  
36 332 As the CoLab-score was developed in our center after the first COVID-19-wave in the  
37  
38 333 Netherlands, the performance was evaluated in our center from July 2020 until October 2021.  
39  
40 334 Lab results from 17489 ED presentations were collected. After applying the inclusion flow as  
41  
42 335 shown in **Figure 1 B**, 14080 presentations remained, of which 1039 were associated with a  
43  
44 336 COVID-19 infection.  
45  
46  
47  
48  
49

50 337 The mean prevalence in this period was 7.4%. The AUC of the CoLab-score in the temporal  
51  
52 338 validation set is 0.916 (95% CI: 0.906 to 0.927). The performance is comparable to the  
53  
54 339 development cohort, although sensitivity is slightly lower and specificity slightly higher (cf.  
55  
56 340 **Table 3** and **Table 4**). The temporal validation dataset was also split into three phases  
57  
58 341 according to dominant SARS-CoV-2 variants and vaccine roll-out (see **Supplemental**  
59  
60

1  
2  
3 342 **Material 2 Figure 1**). The discriminative ability was not lower in the second or third phase,  
4  
5 343 compared to the first phase. Diagnostic performance is preserved in terms of sensitivity and  
6  
7 344 specificity, except a moderately reduced sensitivity of scores  $\geq 3$  in the third phase as  
8  
9  
10 345 compared to the first phase. PPV and NPV are incomparable due to different prevalence/pre-  
11  
12 346 test probabilities in each phase (see **Supplemental Material 2 Table 1**).

13  
14  
15 347 In terms of the predicted probabilities, model calibration shows that overall predicted  
16  
17 348 probabilities are too low (see **Supplemental Material 3** for the calibration plot), which is  
18  
19 349 expected since the prevalence differs and the intercept has to be adjusted to the prevalence.

20 350 In this period at least 22 COVID-19 positive patients were identified by the CoLab-score, that  
21  
22 351 initially did not present with COVID-specific symptoms. Most patients had neurological or  
23  
24 352 orthopedic presenting symptoms.  
25  
26  
27  
28  
29

30 353

### 31 32 33 354 *External validation*

34  
35 355 For external validation, data obtained from three other centers were used, center 1 (N = 1284,  
36  
37 356 52 COVID-19 positive), center 2 (N = 2899, 99 COVID-19 positive) and center 3 (N = 3545,  
38  
39 357 336 COVID-19 positive). The inclusion flow is summarized in **Figure 3**. COVID-19  
40  
41 358 prevalence differed between the three centers (4.0%, 3.4% and 9.5% respectively) and was  
42  
43 359 lower in centers 1 and 2, and higher in center 3 than in the development dataset. The AUCs of  
44  
45 360 the CoLab-score are 0.904 (95% CI: 0.866 to 0.942), 0.886 (95% CI: 0.851 - 0.922) and 0.891  
46  
47 361 (95% CI: 0.872 - 0.909), for centers 1, 2, and 3 respectively.  
48  
49  
50

51 362 Diagnostic performance is shown in **Table 4**. The sensitivity of CoLab-score 0 in all centers  
52  
53 363 is  $\geq 0.96$ . Therefore, the NPV of CoLab-score 0 was more than 99%. Calibration plots for  
54  
55 364 external centers are shown in **Supplemental Material 3**, the observed fraction of COVID-19  
56  
57  
58  
59  
60

365 positives is slightly lower than expected in centers 1 and 2. For center 3, low probabilities  
 366 appear slightly underestimated and high probabilities slightly overestimated.

| CoLab-score | Validation set | Sensitivity              | Specificity              | PPV                      | NPV                      | TP                   | TN                       | FP                    | FN                 |
|-------------|----------------|--------------------------|--------------------------|--------------------------|--------------------------|----------------------|--------------------------|-----------------------|--------------------|
| 0           | Temporal       | 0.967<br>(0.956 - 0.978) | 0.420<br>(0.411 - 0.428) | 0.117<br>(0.115 - 0.119) | 0.994<br>(0.992 - 0.996) | 1005<br>(993 - 1016) | 5476<br>(5366 - 5587)    | 7565<br>(7454 - 7675) | 34<br>(23 - 46)    |
|             | Center 1       | 1.000<br>(1.000 - 1.000) | 0.331<br>(0.307 - 0.358) | 0.059<br>(0.057 - 0.061) | 1.000<br>(1.000 - 1.000) | 52<br>(52 - 52)      | 410<br>(380 - 443)       | 827<br>(794 - 857)    | 0<br>(0 - 0)       |
|             | Center 2       | 0.961<br>(0.922 - 0.990) | 0.351<br>(0.333 - 0.369) | 0.052<br>(0.049 - 0.054) | 0.996<br>(0.992 - 0.999) | 99<br>(95 - 102)     | 985<br>(935 - 1035)      | 1823<br>(1773 - 1873) | 4<br>(1 - 8)       |
|             | Center 3       | 0.970<br>(0.950 - 0.988) | 0.322<br>(0.306 - 0.338) | 0.130<br>(0.126 - 0.133) | 0.991<br>(0.984 - 0.996) | 327<br>(320 - 333)   | 1042<br>(991 - 1092)     | 2193<br>(2143 - 2244) | 10<br>(4 - 17)     |
|             | Temporal       | 0.888<br>(0.870 - 0.908) | 0.791<br>(0.783 - 0.798) | 0.253<br>(0.245 - 0.261) | 0.989<br>(0.987 - 0.991) | 923<br>(904 - 943)   | 10311<br>(10215 - 10401) | 2730<br>(2640 - 2826) | 116<br>(96 - 135)  |
|             | Center 1       | 0.923<br>(0.846 - 0.981) | 0.694<br>(0.669 - 0.720) | 0.113<br>(0.101 - 0.124) | 0.995<br>(0.991 - 0.999) | 48<br>(44 - 51)      | 858<br>(828 - 891)       | 379<br>(346 - 409)    | 4<br>(1 - 8)       |
| $\leq 1$    | Center 2       | 0.913<br>(0.854 - 0.961) | 0.678<br>(0.661 - 0.696) | 0.094<br>(0.087 - 0.101) | 0.995<br>(0.992 - 0.998) | 94<br>(88 - 99)      | 1905<br>(1857 - 1953)    | 903<br>(855 - 951)    | 9<br>(4 - 15)      |
|             | Center 3       | 0.914<br>(0.881 - 0.944) | 0.674<br>(0.657 - 0.691) | 0.226<br>(0.216 - 0.236) | 0.987<br>(0.982 - 0.991) | 308<br>(297 - 318)   | 2180<br>(2126 - 2234)    | 1055<br>(1001 - 1109) | 29<br>(19 - 40)    |
|             | Temporal       | 0.820<br>(0.796 - 0.843) | 0.894<br>(0.889 - 0.899) | 0.382<br>(0.367 - 0.396) | 0.984<br>(0.982 - 0.986) | 852<br>(827 - 876)   | 11661<br>(11591 - 11729) | 1380<br>(1312 - 1450) | 187<br>(163 - 212) |
|             | Center 1       | 0.808<br>(0.692 - 0.904) | 0.811<br>(0.788 - 0.832) | 0.152<br>(0.129 - 0.176) | 0.990<br>(0.984 - 0.995) | 42<br>(36 - 47)      | 1003<br>(975 - 1029)     | 234<br>(208 - 262)    | 10<br>(5 - 16)     |
| $\leq 2$    | Center 2       | 0.845<br>(0.777 - 0.913) | 0.801<br>(0.785 - 0.815) | 0.135<br>(0.122 - 0.147) | 0.993<br>(0.990 - 0.996) | 87<br>(80 - 94)      | 2248<br>(2205 - 2289)    | 560<br>(519 - 603)    | 16<br>(9 - 23)     |
|             | Center 3       | 0.890<br>(0.855 - 0.923) | 0.794<br>(0.779 - 0.808) | 0.311<br>(0.294 - 0.328) | 0.986<br>(0.981 - 0.990) | 300<br>(288 - 311)   | 2569<br>(2521 - 2615)    | 666<br>(620 - 714)    | 37<br>(26 - 49)    |
|             | Temporal       | 0.710<br>(0.682 - 0.738) | 0.962<br>(0.958 - 0.965) | 0.596<br>(0.573 - 0.618) | 0.977<br>(0.974 - 0.979) | 738<br>(709 - 767)   | 12540<br>(12496 - 12582) | 501<br>(459 - 545)    | 301<br>(272 - 330) |
| $\leq 3$    | Center 1       | 0.750<br>(0.635 - 0.865) | 0.909<br>(0.892 - 0.925) | 0.257<br>(0.213 - 0.306) | 0.989<br>(0.983 - 0.994) | 39<br>(33 - 45)      | 1124<br>(1104 - 1144)    | 113<br>(93 - 133)     | 13<br>(7 - 19)     |
|             | Center 2       | 0.660<br>(0.563 - 0.748) | 0.897<br>(0.885 - 0.908) | 0.190<br>(0.163 - 0.218) | 0.986<br>(0.983 - 0.990) | 68<br>(58 - 77)      | 2519<br>(2486 - 2549)    | 289<br>(259 - 322)    | 35<br>(26 - 45)    |

| CoLab-score | Validation set | Sensitivity              | Specificity              | PPV                      | NPV                      | TP                 | TN                       | FP                 | FN                 |
|-------------|----------------|--------------------------|--------------------------|--------------------------|--------------------------|--------------------|--------------------------|--------------------|--------------------|
| ≤ 4         | Center 3       | 0.766<br>(0.718 - 0.810) | 0.887<br>(0.876 - 0.898) | 0.413<br>(0.386 - 0.442) | 0.973<br>(0.968 - 0.978) | 258<br>(242 - 273) | 2869<br>(2835 - 2905)    | 366<br>(330 - 400) | 79<br>(64 - 95)    |
|             | Temporal       | 0.585<br>(0.556 - 0.615) | 0.984<br>(0.982 - 0.987) | 0.750<br>(0.724 - 0.778) | 0.968<br>(0.965 - 0.970) | 608<br>(578 - 639) | 12838<br>(12811 - 12866) | 203<br>(175 - 230) | 431<br>(400 - 461) |
|             | Center 1       | 0.654<br>(0.519 - 0.788) | 0.951<br>(0.939 - 0.962) | 0.359<br>(0.293 - 0.435) | 0.985<br>(0.979 - 0.991) | 34<br>(27 - 41)    | 1176<br>(1161 - 1190)    | 61<br>(47 - 76)    | 18<br>(11 - 25)    |
|             | Center 2       | 0.534<br>(0.437 - 0.621) | 0.952<br>(0.943 - 0.959) | 0.287<br>(0.239 - 0.339) | 0.982<br>(0.979 - 0.986) | 55<br>(45 - 64)    | 2672<br>(2649 - 2693)    | 136<br>(115 - 159) | 48<br>(39 - 58)    |
|             | Center 3       | 0.665<br>(0.611 - 0.718) | 0.930<br>(0.921 - 0.938) | 0.497<br>(0.462 - 0.534) | 0.964<br>(0.958 - 0.969) | 224<br>(206 - 242) | 3008<br>(2980 - 3036)    | 227<br>(199 - 255) | 113<br>(95 - 131)  |

367

368 **Table 4: Diagnostic performance of the CoLab-score in the validation dataset (temporal)**  
 369 **and three external hospitals.**

370 *Sensitivities, specificities, positive predictive values (PPV), negative predictive values (NPV),*  
 371 *true positives (TP), true negatives (TN), false positives (FP) and false negatives (FN) are*  
 372 *shown for fixed cut-offs (CoLab-score 0 till ≤ 4) with bootstrapped 95% confidence intervals*  
 373 *in parentheses. Note that “0” lists the sensitivity and NPV of CoLab-score 0 and “≤ 4” lists*  
 374 *the specificity and PPV of CoLab-score 5.*

## 375 Discussion

376 Given the impact of COVID-19 on society and healthcare, there is a need for simple and fast  
377 detection of patients with a possible COVID-19 infection in the ED. The CoLab-score  
378 described in this study, is a fast and accurate risk score to triage patients presenting at the ED  
379 based on ten routine blood biomarkers and age.

380 The main strength of this study is that this score can be used as an early-warning or triaging  
381 tool for the ED population presenting with abdominal pain, chest pain, shortness of breath,  
382 syncope, sepsis or other non-specific complaints where a routine blood panel is requested.  
383 This is in contrast to the vast majority of COVID-19 diagnostic models that have been  
384 developed on a pre-selected population of PCR-tested patients [9,20–26]. Moreover, the  
385 CoLab-score requires only routine blood tests, instead of (features from) imaging such as CT-  
386 scans or laboratory tests that are not routinely collected in the ED, e.g. interleukin-6 or 3-  
387 hydroxybuteric acid [4]. Compared to lateral flow tests (LFTs), which provide a dichotomous  
388 result within 30 minutes and are widely adopted in EDs, the CoLab-score is a continuous  
389 score. The lowest CoLab-scores (0 - 1) offer higher sensitivity and are therefore more suitable  
390 to rule-out COVID-19 than a LFT, which are only moderately sensitive (albeit more specific)  
391 [27,28].

392 Two other studies have been published which are similar to this study [9,10]. Interestingly,  
393 the study by Soltan et al., ranked basophils and eosinophils as the two most important features  
394 in predicting the outcome, similar to our results [10]. Eosinophils were also seen as one of the  
395 most important features by Plante et al. [9]. However, both studies focus on an artificial  
396 intelligence/machine learning approach. While their approach likely results in higher  
397 predictive performance, due to the ability of machine learning models to capture non-linear  
398 and interaction effects, the goal of this study was to develop a simple, fast and robust model  
399 that can easily be implemented in current hospital IT systems.



1  
2  
3 400 Since this is a retrospective case-control study, there is some unavoidable missing data. In our  
4  
5 401 cohort 17.6% of the ED presentations could not be used due to one or more missing  
6  
7 402 laboratory results. This is lower or equal to similar studies; 22% [23], 17% [21] and 11% [26].  
8  
9 403 Important to note is that 7.7% of missingness is due to analytical errors which can be assumed  
10  
11 404 to be missing completely at random. For the remaining 9.9% of missingness, the full lab panel  
12  
13 405 was most frequently missing for pediatric, obstetric and surgery patients. These patients are  
14  
15 406 presenting with specific complaints for which specific laboratory tests are requested, and  
16  
17 407 hence do not match the inclusion criteria for a routine blood panel. Overall the missingness  
18  
19 408 was significantly lower in the PCR-tested group versus the untested group ( $\chi^2$ -test p-value  
20  
21 409 <0.001). It is assumed that all presentations in the untested group are COVID-19 negative.  
22  
23 410 However, some presentations with asymptomatic COVID-19 could be present in the untested  
24  
25 411 control group. The impact of these 'false controls' is most likely small as other studies  
26  
27 412 indicate that there is a very low positivity rate among asymptomatic ED presentations (only a  
28  
29 413 few in over a thousand tested asymptomatic cases) [29,30].  
30  
31  
32  
33  
34  
35 414 In the external centers, there is a high level of missingness as a result of an incomplete  
36  
37 415 laboratory panel. In the case of centers 1 and 2, only internal medicine ED presentations were  
38  
39 416 tested with a laboratory panel containing the 10 tests required for the CoLab-score. The ED  
40  
41 417 lab panel of other disciplines (e.g. urology, surgery or pediatrics) differed and did not contain  
42  
43 418 the required tests. Nevertheless, the majority of COVID-19 patients were internal medicine  
44  
45 419 ED presentations, which is reflected by the few PCR-positive patients excluded. Due to these  
46  
47 420 high levels of missingness, the results of the external centers cannot be used to show that the  
48  
49 421 CoLab-score generalizes to the entire ED population. Rather, the results show that for the  
50  
51 422 majority of COVID-19 positive patients presenting at the ED, a routine laboratory panel is  
52  
53 423 available from which the CoLab-score can be calculated, and that the performance of the  
54  
55 424 CoLab-score in this population is comparable to the development population.  
56  
57  
58  
59  
60

1  
2  
3 425 The performance of the CoLab-score is affected by the time between the onset of symptoms  
4  
5 426 and ED presentations. The score increases with the duration of symptoms and gradually  
6  
7 427 decreases after day 7 (see **Supplemental Material 4 Figure 1** for a plot of the duration of  
8  
9 428 COVID-19 related symptoms and the CoLab-linear predictor). As a consequence, some  
10  
11 429 COVID-19 patients with early or late presentation after onset of symptoms can be missed.  
12  
13 430 Optimal performance of the CoLab-score is achieved when the onset of symptoms is >1 and  
14  
15 431 <10 days prior to ED presentation. Chemotherapy that causes myeloid suppression, will  
16  
17 432 decrease neutrophilic, basophilic and eosinophilic counts and thereby “falsely” increasing the  
18  
19 433 CoLab-score. Conversely, COVID-19 patients with severe anemia could have “falsely”  
20  
21 434 lowered CoLab-scores. To minimize false negatives, we have therefore advised to report  
22  
23 435 CoLab-scores only when the concentration of erythrocytes is  $\geq 2.9$  /pL.  
24  
25  
26  
27  
28  
29 436 It was chosen to exclude re-presentations after a previous presentation with COVID-19. Since  
30  
31 437 the median time between initial presentation and re-presentation was 12 days, these patients  
32  
33 438 were most likely not re-infected patients, but patients who deteriorated after initial  
34  
35 439 presentation/treatment. Given that the CoLab-score follows the host-immune response, the  
36  
37 440 score is time sensitive (see **Supplemental Material 4 Figure 1**). Including these patients  
38  
39 441 would impact the performance of the CoLab-score as patients in a later phase of the disease  
40  
41 442 show different biomarker profiles. The CoLab-score is aimed towards alerting clinicians to  
42  
43 443 patients presenting with a novel SARS-CoV-2 infection, rather than patients who deteriorate  
44  
45 444 after treatment for COVID-19. Other re-presentations were not excluded, which results in  
46  
47 445 some patients appearing multiple times in a dataset. This was not corrected for in the  
48  
49 446 regression model since the assumption was made that ED presentations are independent  
50  
51 447 observations. The median time between re-presentations is 38 days, most likely resulting in  
52  
53 448 variations in laboratory results between presentations, and hence, little to no correlation  
54  
55 449 between presentations. A sensitivity analysis was performed whereby only the first  
56  
57  
58  
59  
60

1  
2  
3 450 presentation was included for each patient (**Supplemental Material 4 Table 1**), but no  
4  
5 451 difference was found in performance in terms of sensitivity, specificity and AUC.  
6  
7

8 452 The CoLab-score does not serve as a replacement for PCR-testing or LFTs, and can be used to  
9  
10 453 guide PCR-testing when routine blood tests are available. Important to note is that the CoLab-  
11  
12 454 score is only valid for ED presentations where routine blood testing is requested, and as a  
13  
14 455 consequence does not generalize to the ED population who is otherwise well and does not  
15  
16 456 undergo routine blood testing. Using the CoLab-score in a symptomatic/PCR-tested cohort  
17  
18 457 also results in different diagnostic performance characteristics, as compared to using the score  
19  
20 458 on the full ED cohort (see **Supplemental Material 4 Table 1**).  
21  
22  
23

24  
25 459 Finally, the CoLab-score could lead to false positives by other viral infections. However, in an  
26  
27 460 historic patient cohort, the CoLab-score had only limited discriminative ability in separating  
28  
29 461 influenza-PCR-negative from influenza-PCR-positive patients (see **Supplemental Material 4**  
30  
31 462 **Figure 2**) implying specificity for SARS-CoV-2. Since the CoLab-score reflects the host-  
32  
33 463 response to the virus, it is expected that the CoLab-score is also sensitive to future SARS-  
34  
35 464 CoV-2 variants. This is supported by the fact that the discriminative ability is sustained in  
36  
37 465 periods with different dominant variants. Moreover, there is no evidence that the  
38  
39 466 discriminative ability of the CoLab-score is lowered by a change in the ED patient population  
40  
41 467 as a result of widespread vaccination. Although vaccination status is not registered for all  
42  
43 468 presenting patients, in a small subgroup of 12 patients for whom vaccination status was  
44  
45 469 registered, and were COVID-19 positive, 8 of 12 patients had the highest CoLab-score (= 5)  
46  
47 470 (see **Supplemental Material 2 Figure 2**),  
48  
49  
50  
51  
52

53 471 To conclude, the CoLab-score developed and validated in this study, based on 10 routine  
54  
55 472 laboratory results and age, is available within 1 hour for any patient presenting at the ED  
56  
57 473 where routine blood testing is requested. The score can be used by clinicians to guide PCR  
58  
59 474 testing or triage patients and helps to identify COVID-19 in patients presenting at the ED with  
60

1  
2  
3 475 abdominal pain, chest pain, shortness of breath, syncope, sepsis or other non-specific  
4  
5 476 complaints where a routine blood panel is requested. The lowest CoLab-score can be used to  
6  
7 477 effectively rule-out a possible SARS-CoV-2 infection, the highest score to alert physicians to  
8  
9 478 a possible infection. The CoLab-score is therefore a valuable tool to rule out COVID-19,  
10  
11 479 guide PCR testing and is available to any center with access to routine laboratory tests.  
12  
13  
14

15 480  
16  
17  
18  
19  
20  
21  
22  
23  
24  
25  
26  
27  
28  
29  
30  
31  
32  
33  
34  
35  
36  
37  
38  
39  
40  
41  
42  
43  
44  
45  
46  
47  
48  
49  
50  
51  
52  
53  
54  
55  
56  
57  
58  
59  
60

For peer review only

## 481 **Funding statement**

482 This was an investigator-initiated study and no funding was received for this study.

483

## 484 **Competing interests**

485 A-KB reports no conflict of interest. RD reports no conflict of interest. MM reports no  
486 conflict of interest. HA reports no conflict of interest. RvB reports no conflict of interest. WT  
487 reports no conflict of interest. SB reports not conflict of interest. ML reports no conflict of  
488 interest. RM reports no conflict of interest. MB reports no conflict of interest. JK reports no  
489 conflict of interest. MM reports no conflict of interest. JvS reports no conflict of interest. NvR  
490 reports no conflict of interest. VS reports no conflict of interest.

491

## 492 **Data sharing statement**

493 Datasets with source data for Table 1, Figure 2, Table 3 and Table 4, as well the R-code to fit  
494 the model is available from the Dryad repository, DOI:[WILL BE PROVIDED WHEN  
495 UNDER REVIEW]. Technical appendix can be found in **Supplemental Material 1**.

496

## 497 **Author contributorship statement**

498 Arjen-Kars Boer: Conceptualization (Lead), Data curation (Lead), Funding acquisition (Lead),  
499 Investigation (Equal), Methodology (Equal), Supervision (Equal), Writing-original draft  
500 (Equal), Writing-review & editing (Equal).

501 Ruben Deneer: Data curation (Equal), Formal analysis (Equal), Investigation (Equal),  
502 Methodology (Lead), Software (Lead), Visualization (Lead), Writing-original draft (Equal),  
503 Writing-review & editing (Equal).

- 1  
2  
3 504 Maaïke Maas: Conceptualization (Supporting), Resources (Supporting), Supervision  
4  
5 505 (Supporting), Validation (Supporting), Writing-review & editing (Equal).  
6  
7  
8 506 Heidi Ammerlaan: Conceptualization (Supporting), Resources (Supporting), Supervision  
9  
10 507 (Supporting), Validation (Equal), Writing-review & editing (Equal).  
11  
12  
13 508 Roland van Balkom: Conceptualization (Supporting), Resources (Supporting), Supervision  
14  
15 509 (Supporting), Validation (Supporting), Writing-review & editing (Equal).  
16  
17  
18 510 Wendy Thijssen: Conceptualization (Supporting), Resources (Supporting), Supervision  
19  
20 511 (Supporting), Validation (Supporting), Writing-review & editing (Equal).  
21  
22  
23  
24 512 Sophie Bennenbroek: Conceptualization (Supporting), Resources (Supporting), Supervision  
25  
26 513 (Supporting), Validation (Supporting), Writing-review & editing (Equal).  
27  
28  
29 514 Mathie Leers: Resources (Equal), Validation (Equal), Writing-review & editing (Equal).  
30  
31  
32 515 Remy Martens: Resources (Equal), Validation (Equal), Writing-review & editing (Equal).  
33  
34  
35 516 Madelon M. Buijs: Resources (Equal), Validation (Equal), Writing-review & editing (Equal).  
36  
37  
38 517 Jos Kerremans: Resources (Equal), Validation (Equal), Writing-review & editing (Equal).  
39  
40  
41 518 Muriël Messchaert: Resources (Equal), Validation (Equal), Writing-review & editing (Equal).  
42  
43  
44 519 Jeroen van Suijlen: Resources (Supporting), Validation (Supporting), Writing-review & editing  
45  
46 520 (Equal).  
47  
48  
49 521 Natal A.W. van Riel: Methodology (Supporting), Resources (Supporting), Supervision (Equal),  
50  
51 522 Writing-review & editing (Equal).  
52  
53  
54 523 Volkher Scharnhorst: Conceptualization (Equal), Funding acquisition (Equal), Project  
55  
56 524 administration (Lead), Resources (Equal), Supervision (Lead), Writing-review & editing  
57  
58 525 (Equal).  
59  
60

526 **References**

- 527
- 528 1 Coronavirus Disease (COVID-19) Situation Reports.  
529 <https://www.who.int/emergencies/diseases/novel-coronavirus-2019/situation-reports/>  
530 (accessed 4 Feb 2021).
- 531 2 Guan W, Ni Z, Hu Y, *et al.* Clinical Characteristics of Coronavirus Disease 2019 in  
532 China. <https://doi.org/10.1056/NEJMoa2002032> 2020;**382**:1708–20.  
533 doi:10.1056/NEJMOA2002032
- 534 3 Vetter P, Vu DL, L’Huillier AG, *et al.* Clinical features of covid-19. *BMJ* 2020;**369**.  
535 doi:10.1136/BMJ.M1470
- 536 4 Wynants L, Van Calster B, Collins GS, *et al.* Prediction models for diagnosis and  
537 prognosis of covid-19: Systematic review and critical appraisal. *BMJ* 2020;**369**:18.  
538 doi:10.1136/bmj.m1328
- 539 5 Albahri AS, Hamid RA, Alwan J k., *et al.* Role of biological Data Mining and Machine  
540 Learning Techniques in Detecting and Diagnosing the Novel Coronavirus (COVID-19):  
541 A Systematic Review. *J. Med. Syst.* 2020;**44**:122. doi:10.1007/s10916-020-01582-x
- 542 6 Hooli S, King C. Generalizability of Coronavirus Disease 2019 (COVID-19) Clinical  
543 Prediction Models. *Clin Infect Dis* 2020;**71**:897–897. doi:10.1093/cid/ciaa417
- 544 7 Prokop M, Everdingen W van, Vellinga T van R, *et al.* CO-RADS: A Categorical CT  
545 Assessment Scheme for Patients Suspected of Having COVID-19—Definition  
546 and Evaluation. <https://doi.org/10.1148/radiol2020201473> 2020;**296**:E97–104.  
547 doi:10.1148/RADIOL.2020201473
- 548 8 Goodacre S, Thomas B, Sutton L, *et al.* Derivation and validation of a clinical severity

- 1  
2  
3 549 score for acutely ill adults with suspected COVID-19: The PRIEST observational cohort  
4  
5 550 study. *PLoS One* 2021;**16**:e0245840. doi:10.1371/JOURNAL.PONE.0245840  
6  
7  
8 551 9 Plante TB, Blau AM, Berg AN, *et al.* Development and external validation of a machine  
9  
10 552 learning tool to rule out COVID-19 among adults in the emergency department using  
11  
12 553 routine blood tests: A large, multicenter, real-world study. *J Med Internet Res*  
13  
14 554 2020;**22**:e24048. doi:10.2196/24048  
15  
16  
17  
18 555 10 Soltan AAS, Kouchaki S, Zhu T, *et al.* Rapid triage for COVID-19 using routine clinical  
19  
20 556 data for patients attending hospital: development and prospective validation of an  
21  
22 557 artificial intelligence screening test. *Lancet Digit Heal* 2021;**3**:e78–87.  
23  
24 558 doi:10.1016/S2589-7500(20)30274-0  
25  
26  
27  
28 559 11 R Core Team. R: A Language and Environment for Statistical Computing.  
29  
30 560 2020.<https://www.r-project.org/>  
31  
32  
33 561 12 Zou H. The adaptive lasso and its oracle properties. *J Am Stat Assoc* 2006;**101**:1418–29.  
34  
35 562 doi:10.1198/016214506000000735  
36  
37  
38 563 13 Tibshirani R. Regression Shrinkage and Selection Via the Lasso. *J R Stat Soc Ser B*  
39  
40 564 1996;**58**:267–88. doi:10.1111/j.2517-6161.1996.tb02080.x  
41  
42  
43  
44 565 14 Friedman J, Hastie T, Tibshirani R. Regularization paths for generalized linear models  
45  
46 566 via coordinate descent. *J Stat Softw* 2010;**33**:1–22. doi:10.18637/jss.v033.i01  
47  
48  
49 567 15 King G, Zeng L. Logistic Regression in Rare Events Data. *Polit Anal* 2001;**9**:137–63.  
50  
51 568 doi:10.1093/oxfordjournals.pan.a004868  
52  
53  
54 569 16 Efron B. Estimating the error rate of a prediction rule: Improvement on cross-validation.  
55  
56 570 *J Am Stat Assoc* 1983;**78**:316–31. doi:10.1080/01621459.1983.10477973  
57  
58  
59 571 17 Robin X, Turck N, Hainard A, *et al.* pROC: An open-source package for R and S+ to  
60



- 1  
2  
3 572 analyze and compare ROC curves. *BMC Bioinformatics* 2011;**12**:77. doi:10.1186/1471-  
4  
5 573 2105-12-77  
6  
7  
8 574 18 Harrell Jr FE. rms: Regression Modeling Strategies. 2021.https://cran.r-  
9  
10 575 project.org/package=rms  
11  
12  
13 576 19 Ricós C, Alvarez V, Cava F, *et al.* Current databases on biological variation: Pros, cons  
14  
15 and progress. *Scand. J. Clin. Lab. Invest.* 1999;**59**:491–500.  
16 577 doi:10.1080/00365519950185229  
17  
18 578  
19  
20  
21 579 20 Brinati D, Campagner A, Ferrari D, *et al.* Detection of COVID-19 Infection from  
22  
23 580 Routine Blood Exams with Machine Learning: A Feasibility Study. *J Med Syst*  
24  
25 581 2020;**44**:1–12. doi:10.1007/s10916-020-01597-4  
26  
27  
28  
29 582 21 Joshi RP, Pejaver V, Hammarlund NE, *et al.* A predictive tool for identification of  
30  
31 583 SARS-CoV-2 PCR-negative emergency department patients using routine test results. *J*  
32  
33 584 *Clin Virol* 2020;**129**:104502. doi:10.1016/j.jcv.2020.104502  
34  
35  
36 585 22 Qin L, Yang Y, Cao Q, *et al.* A predictive model and scoring system combining clinical  
37  
38 586 and CT characteristics for the diagnosis of COVID-19. *Eur Radiol* 2020;**30**:6797–807.  
39  
40 587 doi:10.1007/s00330-020-07022-1  
41  
42  
43  
44 588 23 Kurstjens S, van der Horst A, Herpers R, *et al.* Rapid identification of SARS-CoV-2-  
45  
46 589 infected patients at the emergency department using routine testing. *Clin Chem Lab Med*  
47  
48 590 2020;**58**:1587–93. doi:10.1515/cclm-2020-0593  
49  
50  
51 591 24 Fink DL, Khan PY, Goldman N, *et al.* Development and internal validation of a  
52  
53 592 diagnostic prediction model for COVID-19 at time of admission to hospital. *QJM An Int*  
54  
55 593 *J Med* Published Online First: 9 November 2020. doi:10.1093/qjmed/hcaa305  
56  
57  
58  
59 594 25 Giamello JD, Paglietta G, Cavalot G, *et al.* A simple tool to help ruling-out Covid-19 in  
60

- 1  
2  
3 595 the emergency department: derivation and validation of the LDH-CRP-Lymphocyte  
4  
5 596 (LCL) score. *Emerg Care J* 2020;**16**. doi:10.4081/ecj.2020.9336  
6  
7  
8 597 26 Tordjman M, Mekki A, Mali RD, *et al*. Pre-test probability for SARS-Cov-2-related  
9  
10 598 infection score: The PARIS score. *PLoS One* 2020;**15**:e0243342.  
11  
12 599 doi:10.1371/journal.pone.0243342  
13  
14  
15  
16 600 27 Peto T, Affron D, Afrough B, *et al*. COVID-19: Rapid antigen detection for SARS-CoV-  
17  
18 601 2 by lateral flow assay: A national systematic evaluation of sensitivity and specificity for  
19  
20 602 mass-testing. *EClinicalMedicine* 2021;**36**:100924.  
21  
22 603 doi:10.1016/J.ECLINM.2021.100924  
23  
24  
25  
26 604 28 García-Fiñana M, Hughes DM, Cheyne CP, *et al*. Performance of the Innova SARS-  
27  
28 605 CoV-2 antigen rapid lateral flow test in the Liverpool asymptomatic testing pilot:  
29  
30 606 population based cohort study. *BMJ* 2021;**374**:1637. doi:10.1136/BMJ.N1637  
31  
32  
33 607 29 Ford JS, Parikh A, Sandhu R, *et al*. Testing Asymptomatic Emergency Department  
34  
35 608 Patients for Coronavirus Disease 2019 (COVID-19) in a Low-prevalence Region. *Acad.*  
36  
37 609 *Emerg. Med.* 2020;**27**:771–4. doi:10.1111/acem.14044  
38  
39  
40  
41 610 30 Ravani P, Saxinger L, Chandran U, *et al*. COVID-19 screening of asymptomatic patients  
42  
43 611 admitted through emergency departments in Alberta: a prospective quality-improvement  
44  
45 612 study. *C Open* 2020;**8**:E887–94. doi:10.9778/cmajo.20200191  
46  
47  
48  
49 613  
50  
51 614  
52  
53  
54  
55  
56  
57  
58  
59  
60

1  
2  
3 615 **Figure legends**  
4

5 616  
6  
7

8 617 **Figure 1: Inclusion flow of patients in the development (A) and temporal validation (B)**  
9  
10 618 **dataset.**

11  
12  
13 619 *All patient admissions with routine venous blood sampling at the emergency department (ED)*  
14  
15 620 *were included. For the development dataset, completeness of the lab panel was assessed for*  
16  
17 621 *all 28 laboratory tests, for the temporal validation dataset this was only necessary for 10*  
18  
19 622 *laboratory tests. The major causes of missingness are described in the text. In the*  
20  
21 623 *development dataset, presentations with extreme values ( $>10$  SD) were excluded. The same*  
22  
23 624 *limits were applied to the temporal validation dataset (see Table 2 for limits).*  
24  
25  
26  
27

28 625

29  
30  
31 626 **Figure 2: Probability density plot of the CoLab-linear predictor.**

32  
33  
34 627 *The probability density plots for COVID (dark grey) and non-COVID patients (light grey) are*  
35  
36 628 *plotted against the linear predictor (see table 2). The CoLab-score cut-offs ( $-5.83$ ,  $-4.02$ ,  $-$*   
37  
38 629  *$3.29$ ,  $-2.34$  and  $-1.64$ ) are depicted with vertical dashed lines. The white-boxed numbers*  
39  
40 630 *(between the cut-offs) represent the corresponding CoLab-score. Note that while the area*  
41  
42 631 *under both curves is identical (since these are probability density functions), in absolute*  
43  
44 632 *numbers the “negative or untested”-group is about 36 times larger than the PCR positive*  
45  
46 633 *group.*  
47  
48  
49

50  
51 634

52  
53  
54 635 **Figure 3: Inclusion flow of ED patients in three external centers.**

55  
56 636 *All emergency department (ED) presentations with routine venous blood sampling were*  
57  
58 637 *included. Missingness of lab panels was assessed for the 11 variables in the CoLab-score (see*  
59  
60

1  
2  
3 638 *Table 2). Re-presentations after a positive PCR result or clinical COVID-19 registration were*  
4  
5 639 *excluded as “previous COVID-19+”. Presentations with any laboratory result above the*  
6  
7 640 *limits of the CoLab-score (see Table 2) were excluded.*  
8  
9  
10  
11  
12  
13  
14  
15  
16  
17  
18  
19  
20  
21  
22  
23  
24  
25  
26  
27  
28  
29  
30  
31  
32  
33  
34  
35  
36  
37  
38  
39  
40  
41  
42  
43  
44  
45  
46  
47  
48  
49  
50  
51  
52  
53  
54  
55  
56  
57  
58  
59  
60

For peer review only

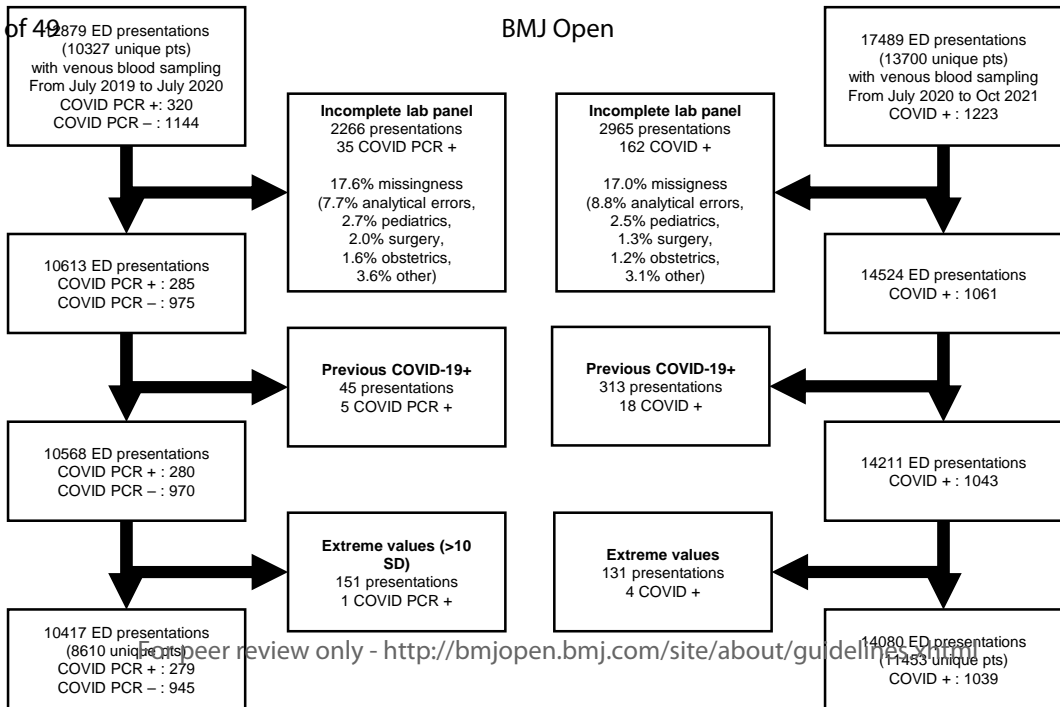

1  
2  
3  
4  
5  
6  
7  
8  
9  
10  
11  
12  
13  
14  
15  
16  
17  
18  
19  
20

### CoLab-score

Threshold

### SARS CoV-2 PCR

Negative or untested  
Positive

1  
2  
3  
4  
5  
6  
7  
8  
9  
10  
11  
12  
13  
14  
15  
16  
17  
18  
19  
20  
21  
22  
23

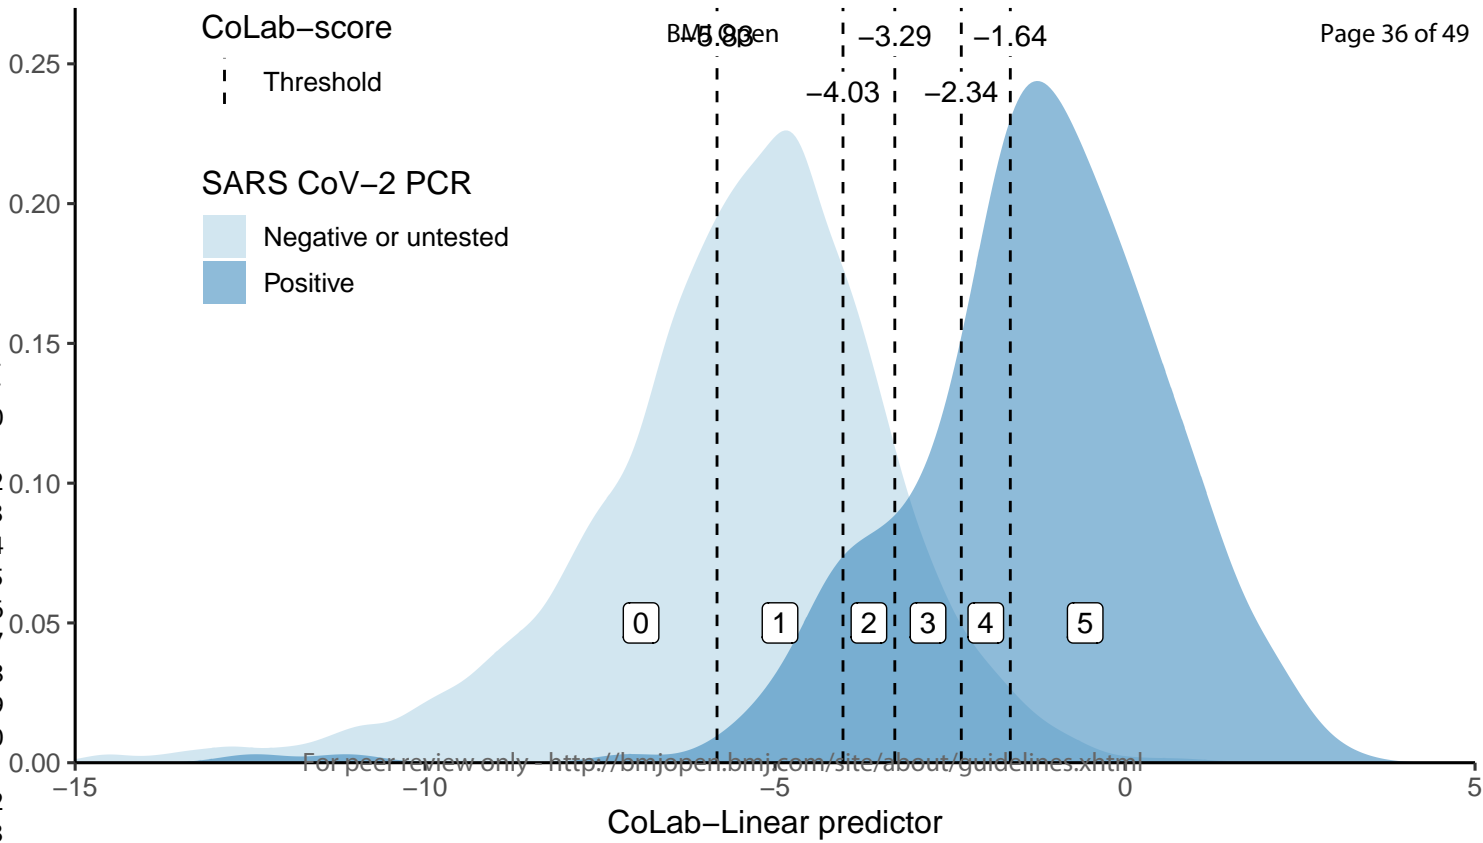

### Center 1

### Center 2

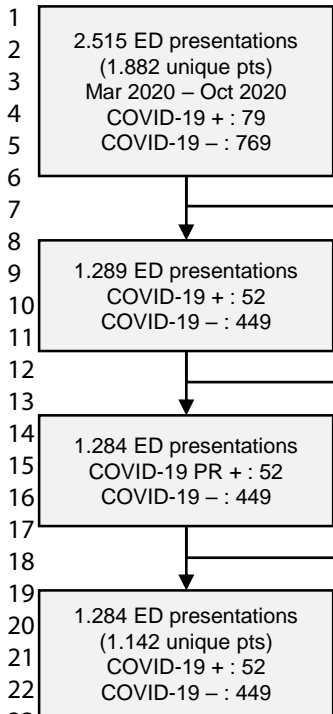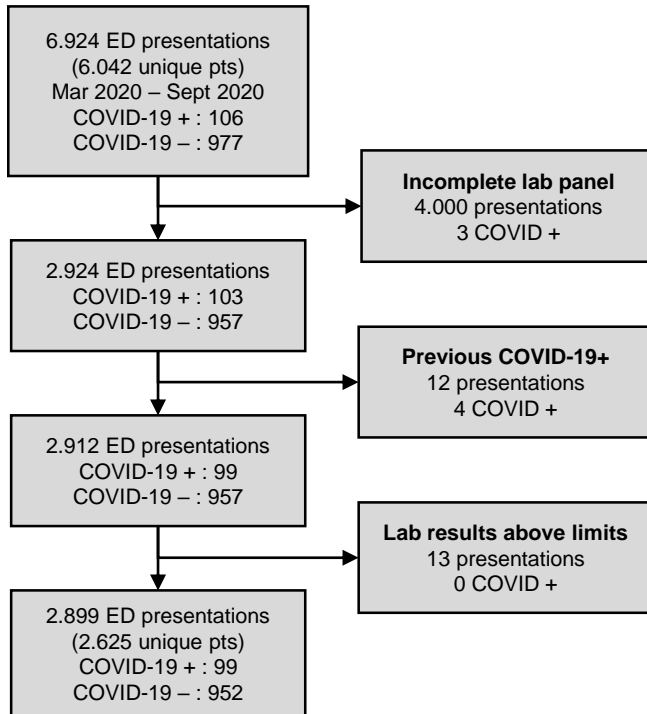

### Center 3

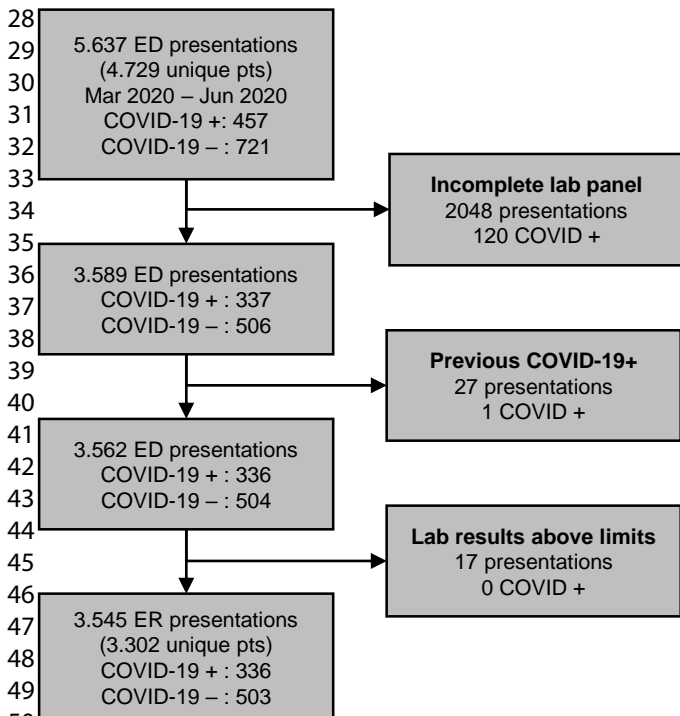

## Supplemental material 1

### Model fitting

Prior to model fitting, covariates were scaled to zero mean and unit variance, after model fitting coefficients were unscaled to obtain regression coefficients on the original scale. In adaptive lasso, weights are applied to each of the covariates present in the lasso constraint, the weight vector has to be calculated before the adaptive lasso regression is performed. Due to multicollinearity between laboratory tests in the routine lab panel, weights in the adaptive lasso were based on ridge regression estimates ( $\hat{\beta}_{ridge}$ ) as recommended by Zou. To obtain  $\hat{\beta}_{ridge}$  the optimal penalty ( $\lambda$ ) for the ridge regression was chosen using 10 fold cross-validation (CV) with area under the ROC curve (AUC) as the loss function. The  $\lambda$  corresponding to the maximum AUC was selected to obtain  $\hat{\beta}_{ridge}$ . The weight vector ( $\hat{w}$ ) was calculated by  $\hat{w} = 1/|\hat{\beta}_{ridge}|^2$ . This weight vector was then used to fit an adaptive lasso regression where  $\lambda$  was chosen by the criterion  $\pm 1$  SE of the maximum AUC.

### Model intercept correction

The linear predictor for a patient  $i$  is calculated as follows:  $lp_i = \beta_0 + \beta_1 x_{i1} + \dots + \beta_n x_{in}$ . Where  $n$  is the number of variables in the final model,  $x_{in}$  are the observed predictor variables for subject  $i$  and  $\beta_n$  the model coefficients. The linear predictor can then be converted to a probability for patient  $i$  ( $P_i$ ) by the logistic function:  $P_i = \frac{1}{1+e^{-lp_i}}$

The intercept term  $\beta_0$  is sensitive to the fraction of cases versus controls in the dataset/population. Since the model is fitted to a case-control dataset where the number cases is fixed (all patients tested positive for COVID-19) and the number of controls is randomly chosen (a 6-month period pre-COVID), the intercept term  $\beta_0$  is a result of this choice and will likely not be generalizable to the real-world setting. Prior correction is a method to correct the estimate of the intercept based on the true fraction of positives in the population,  $\tau$  (prevalence of COVID-19 in the ED) and the fraction of cases in the development dataset,  $\bar{y}$ . The intercept term  $\beta_0$  can then be corrected to obtain  $\beta_{0corrected}$  using the following formula:

$$\beta_{0corrected} = \beta_0 + \beta_{adj}$$

$$\beta_{adj} = -\ln \left[ \left( \frac{1-\tau}{\tau} \right) \left( \frac{\bar{y}}{1-\bar{y}} \right) \right]$$

In our dataset  $\bar{y} = 0.02675$  therefore:

$$\beta_{adj} = -\ln \left( \frac{1-\tau}{\tau} \right) + 3.594$$

An estimate  $\bar{\tau}$  can be used for the prevalence  $\tau$  to obtain  $\bar{\beta}_{adj}$  which can be plugged in the original linear predictor formula to obtain calibrated probabilities:

$$lp_i(\tau) = \beta_0 - \ln \left( \frac{1-\tau}{\tau} \right) + 3.594 + \beta_1 x_{i1} + \dots + \beta_n x_{in}$$



## CoLab-score

An alternative, which is the basis of the CoLab-score, is to choose a fixed probability  $P_i$  above which one considers a patient eligible for further testing. The probability can be expressed as a number needed to test. If one is willing to test 10 patients to find one positive, all patients with  $P_i \geq 0.1$  should be considered positive. In this study a number needed to test of 15 is used, therefore all patients with a  $P_i \geq 0.067$  should be considered positive. On the linear predictor scale this translates to  $\text{logit}(0.067) = -2.639$ . To determine the cutoffs for difference prevalence thresholds one solves the following equation:

$$\beta_0 + \beta_{adj} + \beta_1 x_{i1} + \dots + \beta_n x_{in} \geq -2.639$$

$$\beta_0 + \beta_1 x_{i1} + \dots + \beta_n x_{in} \geq -2.639 - \beta_{adj}$$

$$lp_i(\tau) \geq \ln\left(\frac{1-\tau}{\tau}\right) - 6.233$$

Choosing values for  $\tau$  yields the cutoffs for the CoLab score:

$$lp_i(\tau = 0.4) \geq -5.83 \text{ (CoLab-score} = 1)$$

$$lp_i(\tau = 0.1) \geq -4.03 \text{ (CoLab-score} = 2)$$

$$lp_i(\tau = 0.05) \geq -3.29 \text{ (CoLab-score} = 3)$$

$$lp_i(\tau = 0.02) \geq -2.34 \text{ (CoLab-score} = 4)$$

$$lp_i(\tau = 0.01) \geq -1.64 \text{ (CoLab-score} = 5)$$

These thresholds correspond to CoLab-scores 0 to 5. The interpretation of these scores is as follows; if the prevalence is <1%, only CoLab-score 5 should be classified as positive and CoLab-score 0 till 4 as negative. If the prevalence is 1% – 2%, CoLab-score 4 and 5 should be classified as positive and 1 – 3 negative. Similarly, with a prevalence of 2 – 5% the split is between CoLab-score 2 and 3 and with prevalence of 5 – 10% between CoLab-score 1 – 2. If the prevalence is higher than 10% only CoLab-score 0 is classified as negative. Using the CoLab-score in this fashion, aims to preserve a number need to test of 15.

## Relative importance of variables

Since the variables included in the model are on different scales, the magnitude of the unscaled coefficients cannot be used to compare the importance of variables to each other. To give some indication of the importance of the variables in predicting the outcome, the unscaled coefficients obtained from the adaptive lasso regression were used to calculate the relative importance. The variable with the highest unscaled coefficient was used as maximum ( $\beta_{unscaled,max}$ ), and all other scaled coefficients were divided by this maximum and multiplied by 100 to obtain the relative importance in %:  $\frac{\beta_{unscaled}}{\beta_{unscaled,max}} \cdot 100$ .

## Supplemental material 2

### Vaccination status and COVID-19 ED prevalence plot

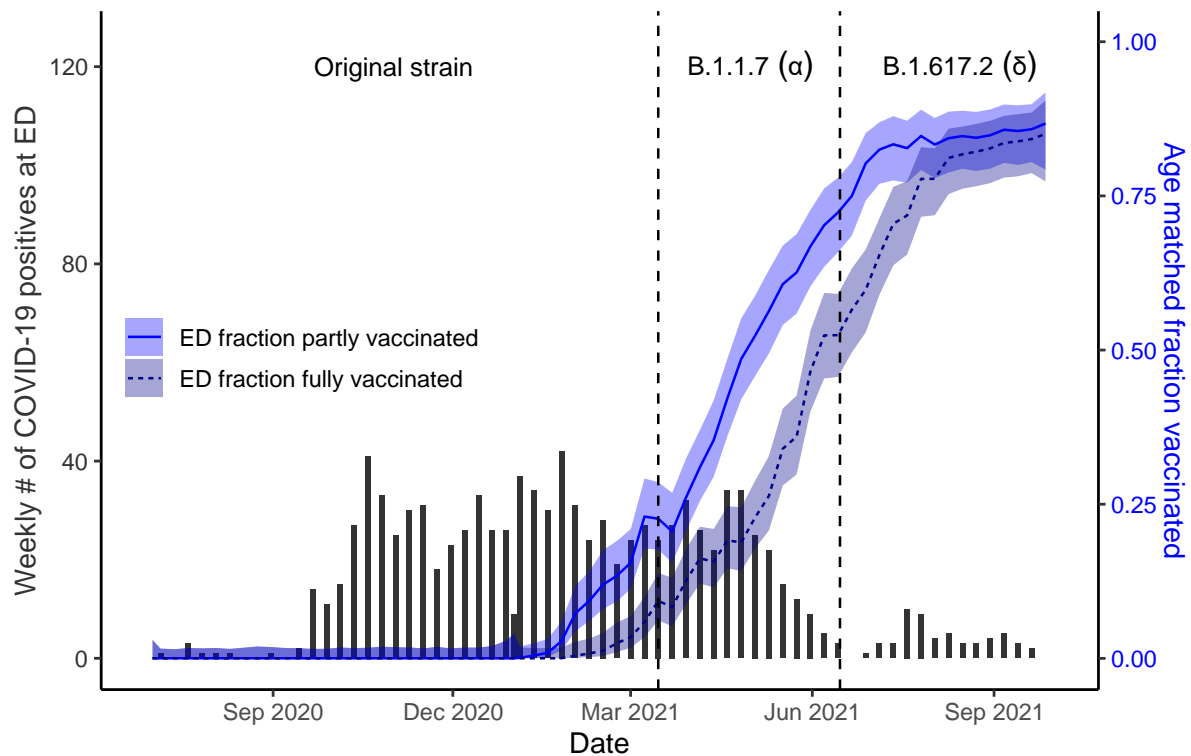

**Figure 1: Temporal validation period split into three phases characterized by weekly number of new COVID-19 cases at the emergency department (ED) and estimated fraction of ED patients vaccinated.**

The temporal validation dataset consists of ED presentations from July 2020 until October 2021. As stated in the “Materials and Methods” section, this period was split into three phases: i) from July 2020 until March 2021, no vaccination and no variants of concern identified ii) from March 2021 until June 2021, partial vaccination and B.1.1.7 (Alpha) variant identified as dominant iii) from June 2021 until October 2021, widespread vaccination and B.1.617.2 (Delta) variant identified as dominant. The ED fraction vaccinated is estimated by merging data from the Dutch national institute of public health by the date of the ED presentation and the year of birth of the patient. The gray bars depict weekly number of new COVID-19 cases at the ED, the blue lines the estimated fraction of ED patients fully or partially vaccinated.

## CoLab-score performance

| Phase                                | Cases/controls (prevalence) | AUC                   |
|--------------------------------------|-----------------------------|-----------------------|
| Original strain & no vaccinations    | 694/7999 (8.6%)             | 0.909 (0.896 - 0.923) |
| B.1.1.7 strain & partial vaccination | 287/2845 (10.1%)            | 0.937 (0.921 - 0.953) |
| B.1.617.2 strain & full vaccination  | 58/3236 (1.8%)              | 0.898 (0.857 - 0.939) |

| CoLab-score | Phase                                | Sensitivity           | Specificity           | PPV                   | NPV                   |
|-------------|--------------------------------------|-----------------------|-----------------------|-----------------------|-----------------------|
| 0           | Original strain & no vaccinations    | 0.960 (0.944 - 0.974) | 0.418 (0.407 - 0.429) | 0.135 (0.133 - 0.138) | 0.991 (0.987 - 0.994) |
|             | B.1.1.7 strain & partial vaccination | 0.983 (0.969 - 0.997) | 0.432 (0.413 - 0.450) | 0.162 (0.158 - 0.168) | 0.996 (0.992 - 0.999) |
|             | B.1.617.2 strain & full vaccination  | 0.983 (0.948 - 1.000) | 0.415 (0.396 - 0.432) | 0.030 (0.028 - 0.031) | 0.999 (0.998 - 1.000) |
| ≤1          | Original strain & no vaccinations    | 0.879 (0.854 - 0.902) | 0.789 (0.779 - 0.798) | 0.283 (0.273 - 0.294) | 0.986 (0.983 - 0.988) |
|             | B.1.1.7 strain & partial vaccination | 0.916 (0.885 - 0.948) | 0.809 (0.793 - 0.824) | 0.350 (0.332 - 0.370) | 0.989 (0.984 - 0.993) |
|             | B.1.617.2 strain & full vaccination  | 0.862 (0.776 - 0.948) | 0.780 (0.765 - 0.794) | 0.067 (0.059 - 0.074) | 0.997 (0.995 - 0.999) |
| ≤2          | Original strain & no vaccinations    | 0.813 (0.784 - 0.842) | 0.894 (0.887 - 0.901) | 0.421 (0.404 - 0.441) | 0.980 (0.978 - 0.983) |
|             | B.1.1.7 strain & partial vaccination | 0.864 (0.826 - 0.902) | 0.897 (0.885 - 0.908) | 0.484 (0.455 - 0.516) | 0.983 (0.979 - 0.988) |
|             | B.1.617.2 strain & full vaccination  | 0.690 (0.569 - 0.810) | 0.892 (0.881 - 0.902) | 0.104 (0.086 - 0.123) | 0.994 (0.991 - 0.996) |
| ≤3          | Original strain & no vaccinations    | 0.697 (0.661 - 0.731) | 0.962 (0.957 - 0.966) | 0.634 (0.605 - 0.662) | 0.971 (0.968 - 0.974) |
|             | B.1.1.7 strain & partial vaccination | 0.760 (0.711 - 0.812) | 0.963 (0.955 - 0.970) | 0.696 (0.650 - 0.739) | 0.973 (0.967 - 0.978) |
|             | B.1.617.2 strain & full vaccination  | 0.621 (0.483 - 0.741) | 0.960 (0.954 - 0.967) | 0.222 (0.178 - 0.268) | 0.993 (0.990 - 0.995) |
| ≤4          | Original strain & no vaccinations    | 0.566 (0.529 - 0.602) | 0.984 (0.981 - 0.987) | 0.775 (0.740 - 0.808) | 0.960 (0.957 - 0.963) |
|             | B.1.1.7 strain & partial vaccination | 0.645 (0.589 - 0.704) | 0.983 (0.978 - 0.988) | 0.809 (0.762 - 0.856) | 0.961 (0.955 - 0.967) |
|             | B.1.617.2 strain & full vaccination  | 0.517 (0.397 - 0.638) | 0.986 (0.982 - 0.990) | 0.400 (0.319 - 0.500) | 0.991 (0.989 - 0.993) |

**Table 2: Diagnostic performance of the CoLab-score in the temporal validation dataset, split by phase.**

Sensitivities, specificities, positive predictive values (PPV) and negative predictive values (NPV) are shown for fixed cut-offs (CoLab-score 0 till  $\leq 4$ ) with bootstrapped 95% confidence intervals in parentheses. The temporal validation dataset is split into three phases according to dominant SARS-CoV-2 strains in the Netherlands and estimated fraction of ED patients vaccinated (see Figure above). Note that “0” lists the sensitivity and NPV of CoLab-score 0 and “ $\leq 4$ ” lists the specificity and PPV of CoLab-score 5. The AUC was significantly higher in the second phase as compared to the first phase (DeLong test p-value: 0.0175), but did not differ significantly between the third and first phase (DeLong test p-value: 0.3903).

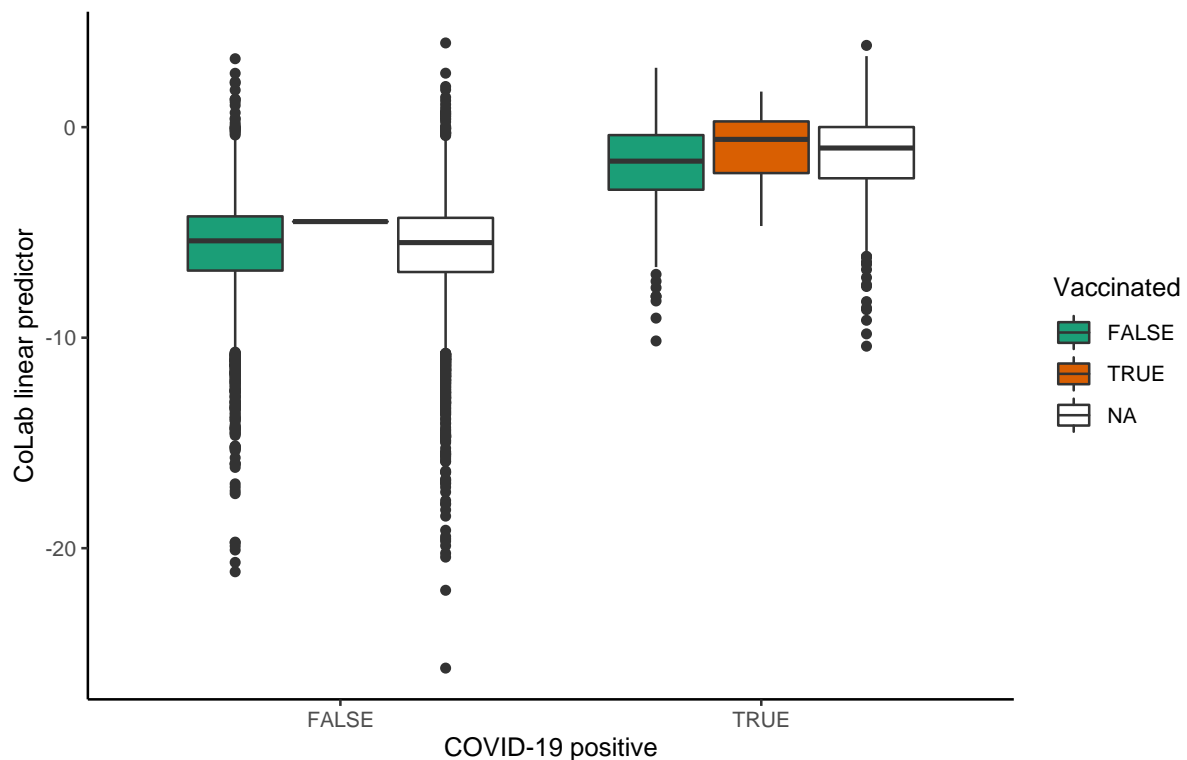

**Figure 2: Boxplots of CoLab linear predictor versus COVID-19 positive, split by registered vaccination status.**

The CoLab linear predictor is calculated for all ED presentations in the temporal validation set. Presentations who are registered as vaccinated are labeled TRUE ( $N = 13$ ).

Presentations before vaccine roll-out are labeled FALSE ( $N = 5855$ ). Presentations during

1  
2  
3 *vaccine roll-out but where no status is registered are labeled NA (N = 8212). Of the 13*  
4  
5 *presentations who were registered as vaccinated, 12 were COVID-19 positive and 1 negative.*  
6  
7 *Note that vaccination status is only registered if a patient is SARS-CoV-2 PCR positive or*  
8  
9 *considered positive until proven otherwise, therefore there is only one COVID-19 negative*  
10  
11 *patient with a registered vaccination status.*  
12  
13  
14  
15  
16  
17  
18  
19  
20  
21  
22  
23  
24  
25  
26  
27  
28  
29  
30  
31  
32  
33  
34  
35  
36  
37  
38  
39  
40  
41  
42  
43  
44  
45  
46  
47  
48  
49  
50  
51  
52  
53  
54  
55  
56  
57  
58  
59  
60

For peer review only

## Supplemental material 3



**Figure 1: CoLab-score calibration plots of the temporal validation (A), external validation center 1 (B), external validation center 2 (C) and external validation center 3 (D).**

*In the calibration plots, the proportion of observed COVID-19 positives versus expected probabilities are plotted. Observations are grouped with an average of 150 observations per group. The expected probabilities follow from applying the inverse logit function to the CoLab-linear predictor calculated from Table 2. If the observed proportion in an external dataset is lower than the expected proportion, this means risks are over-estimated, if the observed fraction is higher, risks are under-estimated. Ideally, observed proportions are equal to expected proportions, this ideal-calibration-line is shown as a straight line through the origin with a slope of 1. The logistic calibration line is a logistic regression fit of the predicted probabilities. [Intercept, slope] for plots A-D: A [1.34, 1.08], B [-0.39, 0.92], C [-0.76, 0.77], D [0.08, 0.79]. Although no validation datasets show perfect calibration, this is the result of differences in COVID-19 prevalence in the temporal validation dataset (7.4% versus 2.2%) and differences in calibration of laboratory equipment in the three external centers.*



**Figure 2: Probability density plots of laboratory parameters.**

Probability density plots are shown for all control patients of the development dataset and the three external centers. Ideally all distributions should overlap since this implies that control patient populations are most likely similar in the development dataset to the external datasets.

When comparing the distribution of the CoLab variables for all control-patients across different external validation datasets, albumin and LD show the largest deviations.

## Supplemental material 4

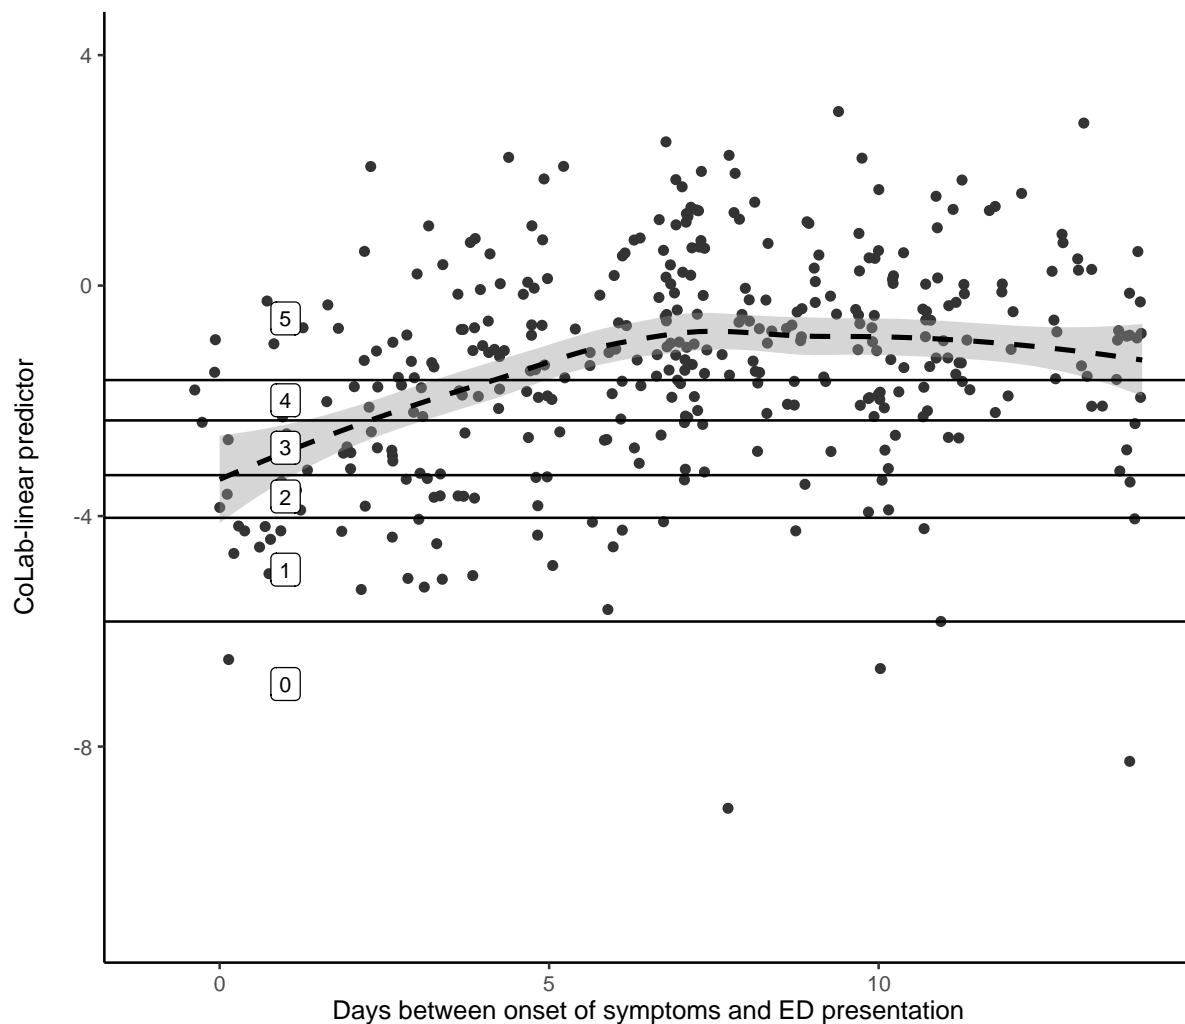

**Figure 1: Association between the CoLab-linear predictor and the duration of COVID-19-related symptoms.**

*For all PCR-positive ED presentations in the development and temporal validation dataset, the CoLab-linear predictor is plotted against the duration of COVID-related symptoms as registered in the electronic patient records. Patients with unknown duration are not plotted. Patients without symptoms were plotted at 0 days. The solid horizontal lines represent the CoLab-score thresholds, the dashed line is a LOESS regression curve with 95% CI. As the duration of symptoms is an integer, some random jitter was added to the days, for visualization purposes. Note that only the first 14 days are shown in this graph.*





**Figure 2: Probability density plot of CoLab-score for RS-, Rhino- and Influenza-virus PCR tested ED patients.**

*For 183 ED presentations that were PCR tested for either RS-, Rhino- and Influenza-virus the CoLab-score was calculated. 91 presentations were PCR positive, 92 were PCR negative. The CoLab-score is only marginally elevated for PCR positive patients, the area under the ROC-curve in separating both groups is 0.573 (95% CI: 0.4896-0.6563).*

| Inclusion criterion                                     | Cases/controls (prevalence) | AUC                   |
|---------------------------------------------------------|-----------------------------|-----------------------|
| Temporal validation (reference)                         | 1039/14080 (7.4%)           | 0.916 (0.906 - 0.927) |
| Only first presentations, re-presentations are excluded | 937/11166 (8.4%)            | 0.919 (0.909 - 0.930) |
| Only PCR-tested presentations                           | 372/4062 (9.2%)             | 0.840 (0.817 - 0.862) |

| CoLab-score | Validation set           | Sensitivity              | Specificity              | PPV                      | NPV                      | TP                   | TN                       | FP                    | FN                 |
|-------------|--------------------------|--------------------------|--------------------------|--------------------------|--------------------------|----------------------|--------------------------|-----------------------|--------------------|
| 0           | Reference                | 0.967<br>(0.956 - 0.978) | 0.420<br>(0.411 - 0.428) | 0.117<br>(0.115 - 0.119) | 0.994<br>(0.992 - 0.996) | 1005<br>(993 - 1016) | 5476<br>(5366 - 5587)    | 7565<br>(7454 - 7675) | 34<br>(23 - 46)    |
|             | First presentations      | 0.968<br>(0.956 - 0.979) | 0.416<br>(0.406 - 0.426) | 0.132<br>(0.130 - 0.134) | 0.993<br>(0.990 - 0.995) | 907<br>(896 - 917)   | 4259<br>(4156 - 4353)    | 5970<br>(5876 - 6073) | 30<br>(20 - 41)    |
|             | PCR-tested presentations | 0.946<br>(0.922 - 0.968) | 0.353<br>(0.338 - 0.368) | 0.129<br>(0.125 - 0.132) | 0.985<br>(0.979 - 0.991) | 352<br>(343 - 360)   | 1303<br>(1246 - 1359)    | 2387<br>(2331 - 2444) | 20<br>(12 - 29)    |
| ≤ 1         | Reference                | 0.888<br>(0.870 - 0.908) | 0.791<br>(0.783 - 0.798) | 0.253<br>(0.245 - 0.261) | 0.989<br>(0.987 - 0.991) | 923<br>(904 - 943)   | 10311<br>(10215 - 10401) | 2730<br>(2640 - 2826) | 116<br>(96 - 135)  |
|             | First presentations      | 0.890<br>(0.870 - 0.908) | 0.793<br>(0.785 - 0.801) | 0.282<br>(0.273 - 0.292) | 0.987<br>(0.985 - 0.990) | 834<br>(815 - 851)   | 8112<br>(8030 - 8194)    | 2117<br>(2035 - 2199) | 103<br>(86 - 122)  |
|             | PCR-tested presentations | 0.852<br>(0.817 - 0.887) | 0.671<br>(0.656 - 0.686) | 0.207<br>(0.197 - 0.217) | 0.978<br>(0.973 - 0.983) | 317<br>(304 - 330)   | 2477<br>(2421 - 2533)    | 1213<br>(1157 - 1269) | 55<br>(42 - 68)    |
| ≤ 2         | Reference                | 0.820<br>(0.796 - 0.843) | 0.894<br>(0.889 - 0.899) | 0.382<br>(0.367 - 0.396) | 0.984<br>(0.982 - 0.986) | 852<br>(827 - 876)   | 11661<br>(11591 - 11729) | 1380<br>(1312 - 1450) | 187<br>(163 - 212) |
|             | First presentations      | 0.824<br>(0.798 - 0.845) | 0.898<br>(0.892 - 0.904) | 0.426<br>(0.410 - 0.441) | 0.982<br>(0.980 - 0.985) | 772<br>(748 - 792)   | 9187<br>(9127 - 9249)    | 1042<br>(980 - 1102)  | 165<br>(145 - 189) |
|             | PCR-tested presentations | 0.734<br>(0.688 - 0.777) | 0.800<br>(0.786 - 0.812) | 0.270<br>(0.252 - 0.287) | 0.968<br>(0.962 - 0.973) | 273<br>(256 - 289)   | 2951<br>(2902 - 2997)    | 739<br>(693 - 788)    | 99<br>(83 - 116)   |
| ≤ 3         | Reference                | 0.710<br>(0.682 - 0.738) | 0.962<br>(0.958 - 0.965) | 0.596<br>(0.573 - 0.618) | 0.977<br>(0.974 - 0.979) | 738<br>(709 - 767)   | 12540<br>(12496 - 12582) | 501<br>(459 - 545)    | 301<br>(272 - 330) |
|             | First presentations      | 0.716<br>(0.687 - 0.744) | 0.966<br>(0.962 - 0.969) | 0.658<br>(0.633 - 0.682) | 0.974<br>(0.971 - 0.976) | 671<br>(644 - 697)   | 9880<br>(9844 - 9915)    | 349<br>(314 - 385)    | 266<br>(240 - 293) |
|             | PCR-tested presentations | 0.591<br>(0.540 - 0.640) | 0.911<br>(0.902 - 0.921) | 0.403<br>(0.370 - 0.433) | 0.957<br>(0.952 - 0.962) | 220<br>(201 - 238)   | 3363<br>(3328 - 3397)    | 327<br>(293 - 362)    | 152<br>(134 - 171) |
| ≤ 4         | Reference                | 0.585<br>(0.556 - 0.615) | 0.984<br>(0.982 - 0.987) | 0.750<br>(0.724 - 0.778) | 0.968<br>(0.965 - 0.970) | 608<br>(578 - 639)   | 12838<br>(12811 - 12866) | 203<br>(175 - 230)    | 431<br>(400 - 461) |
|             | First presentations      | 0.590<br>(0.558 - 0.621) | 0.987<br>(0.985 - 0.989) | 0.805<br>(0.776 - 0.832) | 0.963<br>(0.961 - 0.966) | 553<br>(523 - 582)   | 10095<br>(10071 - 10117) | 134<br>(112 - 158)    | 384<br>(355 - 414) |
|             | PCR-tested presentations | 0.452<br>(0.401 - 0.503) | 0.959<br>(0.953 - 0.965) | 0.526<br>(0.480 - 0.575) | 0.945<br>(0.941 - 0.950) | 168<br>(149 - 187)   | 3539<br>(3516 - 3562)    | 151<br>(128 - 174)    | 204<br>(185 - 223) |

1  
2  
3 **Table 1: Sensitivity analysis of the CoLab-score in the temporal validation dataset using**  
4 **different inclusion criteria.**  
5

6  
7 *Sensitivities, specificities, positive predictive values (PPV), negative predictive values (NPV),*  
8 *true positives (TP), true negatives (TN), false positives (FP) and false negatives (FN) are*  
9 *shown for fixed cut-offs (CoLab-score 0 till  $\leq 4$ ) with bootstrapped 95% confidence intervals*  
10 *in parentheses. The temporal validation dataset is used to compare the performance of the*  
11 *CoLab-score with inclusion criteria that differ from the development dataset. The first line*  
12 *shows the performance of the temporal validation dataset with the original inclusion criteria*  
13 *as specified in Figure 1B. The second line shows the performance of the CoLab-score when*  
14 *all re-presentations are excluded (i.e. no repeated presentations). The third line shows the*  
15 *performance of the CoLab-score in the subgroup of patients that underwent PCR-testing.*  
16  
17  
18  
19  
20  
21  
22  
23  
24  
25  
26  
27  
28  
29  
30  
31  
32  
33  
34  
35  
36  
37  
38  
39  
40  
41  
42  
43  
44  
45  
46  
47  
48  
49  
50  
51  
52  
53  
54  
55  
56  
57  
58  
59  
60

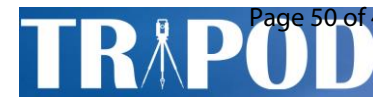

TRIPOD Checklist: Prediction Model Development and Validation

| Section/Topic                | Item | Checklist Item                                                                                                                                                                                            | Page      |
|------------------------------|------|-----------------------------------------------------------------------------------------------------------------------------------------------------------------------------------------------------------|-----------|
| <b>Title and abstract</b>    |      |                                                                                                                                                                                                           |           |
| Title                        | 1    | D;V Identify the study as developing and/or validating a multivariable prediction model, the target population, and the outcome to be predicted.                                                          | 1         |
| Abstract                     | 2    | D;V Provide a summary of objectives, study design, setting, participants, sample size, predictors, outcome, statistical analysis, results, and conclusions.                                               | 3, 4      |
| <b>Introduction</b>          |      |                                                                                                                                                                                                           |           |
| Background and objectives    | 3a   | D;V Explain the medical context (including whether diagnostic or prognostic) and rationale for developing or validating the multivariable prediction model, including references to existing models.      | 6, 7      |
|                              | 3b   | D;V Specify the objectives, including whether the study describes the development or validation of the model or both.                                                                                     | 7         |
| <b>Methods</b>               |      |                                                                                                                                                                                                           |           |
| Source of data               | 4a   | D;V Describe the study design or source of data (e.g., randomized trial, cohort, or registry data), separately for the development and validation data sets, if applicable.                               | 8, 11-12  |
|                              | 4b   | D;V Specify the key study dates, including start of accrual; end of accrual; and, if applicable, end of follow-up.                                                                                        | 8         |
| Participants                 | 5a   | D;V Specify key elements of the study setting (e.g., primary care, secondary care, general population) including number and location of centres.                                                          | 8         |
|                              | 5b   | D;V Describe eligibility criteria for participants.                                                                                                                                                       | 8, 9, S1  |
|                              | 5c   | D;V Give details of treatments received, if relevant.                                                                                                                                                     | N/A       |
| Outcome                      | 6a   | D;V Clearly define the outcome that is predicted by the prediction model, including how and when assessed.                                                                                                | 9         |
|                              | 6b   | D;V Report any actions to blind assessment of the outcome to be predicted.                                                                                                                                | N/A       |
| Predictors                   | 7a   | D;V Clearly define all predictors used in developing or validating the multivariable prediction model, including how and when they were measured.                                                         | 8, 9      |
|                              | 7b   | D;V Report any actions to blind assessment of predictors for the outcome and other predictors.                                                                                                            | N/A       |
| Sample size                  | 8    | D;V Explain how the study size was arrived at.                                                                                                                                                            | N/A       |
| Missing data                 | 9    | D;V Describe how missing data were handled (e.g., complete-case analysis, single imputation, multiple imputation) with details of any imputation method.                                                  | 9         |
| Statistical analysis methods | 10a  | D Describe how predictors were handled in the analyses.                                                                                                                                                   | 10        |
|                              | 10b  | D Specify type of model, all model-building procedures (including any predictor selection), and method for internal validation.                                                                           | 10-12, S1 |
|                              | 10c  | V For validation, describe how the predictions were calculated.                                                                                                                                           | 16        |
|                              | 10d  | D;V Specify all measures used to assess model performance and, if relevant, to compare multiple models.                                                                                                   | 11-13     |
|                              | 10e  | V Describe any model updating (e.g., recalibration) arising from the validation, if done.                                                                                                                 | N/A       |
| Risk groups                  | 11   | D;V Provide details on how risk groups were created, if done.                                                                                                                                             | N/A       |
| Development vs. validation   | 12   | V For validation, identify any differences from the development data in setting, eligibility criteria, outcome, and predictors.                                                                           | 22        |
| <b>Results</b>               |      |                                                                                                                                                                                                           |           |
| Participants                 | 13a  | D;V Describe the flow of participants through the study, including the number of participants with and without the outcome and, if applicable, a summary of the follow-up time. A diagram may be helpful. | F1        |
|                              | 13b  | D;V Describe the characteristics of the participants (basic demographics, clinical features, available predictors), including the number of participants with missing data for predictors and outcome.    | T1        |
|                              | 13c  | V For validation, show a comparison with the development data of the distribution of important variables (demographics, predictors and outcome).                                                          | S3        |
| Model development            | 14a  | D Specify the number of participants and outcome events in each analysis.                                                                                                                                 | F1, F3    |
|                              | 14b  | D If done, report the unadjusted association between each candidate predictor and outcome.                                                                                                                | N/A       |
| Model specification          | 15a  | D Present the full prediction model to allow predictions for individuals (i.e., all regression coefficients, and model intercept or baseline survival at a given time point).                             | T2        |
|                              | 15b  | D Explain how to use the prediction model.                                                                                                                                                                | T2, S1    |
| Model performance            | 16   | D;V Report performance measures (with CIs) for the prediction model.                                                                                                                                      | T3, T4    |
| Model-updating               | 17   | V If done, report the results from any model updating (i.e., model specification, model performance).                                                                                                     | N/A       |
| <b>Discussion</b>            |      |                                                                                                                                                                                                           |           |
| Limitations                  | 18   | D;V Discuss any limitations of the study (such as nonrepresentative sample, few events per predictor, missing data).                                                                                      | 21-23     |
| Interpretation               | 19a  | V For validation, discuss the results with reference to performance in the development data, and any other validation data.                                                                               | 19-20     |
|                              | 19b  | D;V Give an overall interpretation of the results, considering objectives, limitations, results from similar studies, and other relevant evidence.                                                        | 19-20     |
| Implications                 | 20   | D;V Discuss the potential clinical use of the model and implications for future research.                                                                                                                 | 20-21     |
| <b>Other information</b>     |      |                                                                                                                                                                                                           |           |
| Supplementary information    | 21   | D;V Provide information about the availability of supplementary resources, such as study protocol, Web calculator, and data sets.                                                                         | N/A       |
| Funding                      | 22   | D;V Give the source of funding and the role of the funders for the present study.                                                                                                                         | N/A       |

\*Items relevant only to the development of a prediction model are denoted by D, items relating solely to a validation of a prediction model are denoted by V, and items relating to both are denoted D;V. We recommend using the TRIPOD Checklist in conjunction with the TRIPOD Explanation and Elaboration document. S = Supplemental material, F = Figure, T = Table.

# BMJ Open

## Development and validation of an early warning score to identify COVID-19 in the emergency department based on routine laboratory tests: a multicenter case-control study

|                                 |                                                                                                                                                                                                                                                                                                                                                                                                                                                                                                                                                                                                                                                                                                                                                                                                                                                              |
|---------------------------------|--------------------------------------------------------------------------------------------------------------------------------------------------------------------------------------------------------------------------------------------------------------------------------------------------------------------------------------------------------------------------------------------------------------------------------------------------------------------------------------------------------------------------------------------------------------------------------------------------------------------------------------------------------------------------------------------------------------------------------------------------------------------------------------------------------------------------------------------------------------|
| Journal:                        | <i>BMJ Open</i>                                                                                                                                                                                                                                                                                                                                                                                                                                                                                                                                                                                                                                                                                                                                                                                                                                              |
| Manuscript ID                   | bmjopen-2021-059111.R3                                                                                                                                                                                                                                                                                                                                                                                                                                                                                                                                                                                                                                                                                                                                                                                                                                       |
| Article Type:                   | Original research                                                                                                                                                                                                                                                                                                                                                                                                                                                                                                                                                                                                                                                                                                                                                                                                                                            |
| Date Submitted by the Author:   | 09-Jun-2022                                                                                                                                                                                                                                                                                                                                                                                                                                                                                                                                                                                                                                                                                                                                                                                                                                                  |
| Complete List of Authors:       | Boer, Arjen-Kars; Catharina Hospital Deneer, Ruben; Catharina Hospital, ; Eindhoven University of Technology, Maas, Maaïke; Catharina Ziekenhuis, emergency department Ammerlaan, Heidi; Catharina Hospital van Balkom, Roland; Catharina Hospital Thijssen, Wendy; Catharina ziekenhuis, Emergency medicine Bennenbroek, Sophie; Catharina Hospital Leers, Mathie; Zuyderland Medical Centre Heerlen, Clinical Chemistry & Hematology Martens, Remy; Zuyderland Medical Centre Heerlen, Clinical Chemistry & Hematology Buijs, Madelon; Atalmedial Kerremans, Jos; Alrijne Hospital Location Leiderdorp Messchaert, Muriël ; Gelre Hospitals van Suijlen, Jeroen; Gelre Hospitals van Riel, Natal; Eindhoven University of Technology, ; Amsterdam University Medical Centres Scharnhorst, Volkher; Catharina Hospital; Eindhoven University of Technology, |
| <b>Primary Subject Heading</b>: | Emergency medicine                                                                                                                                                                                                                                                                                                                                                                                                                                                                                                                                                                                                                                                                                                                                                                                                                                           |
| Secondary Subject Heading:      | Health informatics, Infectious diseases                                                                                                                                                                                                                                                                                                                                                                                                                                                                                                                                                                                                                                                                                                                                                                                                                      |
| Keywords:                       | COVID-19, STATISTICS & RESEARCH METHODS, ACCIDENT & EMERGENCY MEDICINE, Clinical chemistry < PATHOLOGY, Health informatics < BIOTECHNOLOGY & BIOINFORMATICS                                                                                                                                                                                                                                                                                                                                                                                                                                                                                                                                                                                                                                                                                                  |
|                                 |                                                                                                                                                                                                                                                                                                                                                                                                                                                                                                                                                                                                                                                                                                                                                                                                                                                              |

SCHOLARONE™  
Manuscripts



I, the Submitting Author has the right to grant and does grant on behalf of all authors of the Work (as defined in the below author licence), an exclusive licence and/or a non-exclusive licence for contributions from authors who are: i) UK Crown employees; ii) where BMJ has agreed a CC-BY licence shall apply, and/or iii) in accordance with the terms applicable for US Federal Government officers or employees acting as part of their official duties; on a worldwide, perpetual, irrevocable, royalty-free basis to BMJ Publishing Group Ltd ("BMJ") its licensees and where the relevant Journal is co-owned by BMJ to the co-owners of the Journal, to publish the Work in this journal and any other BMJ products and to exploit all rights, as set out in our [licence](#).

The Submitting Author accepts and understands that any supply made under these terms is made by BMJ to the Submitting Author unless you are acting as an employee on behalf of your employer or a postgraduate student of an affiliated institution which is paying any applicable article publishing charge ("APC") for Open Access articles. Where the Submitting Author wishes to make the Work available on an Open Access basis (and intends to pay the relevant APC), the terms of reuse of such Open Access shall be governed by a Creative Commons licence – details of these licences and which [Creative Commons](#) licence will apply to this Work are set out in our licence referred to above.

Other than as permitted in any relevant BMJ Author's Self Archiving Policies, I confirm this Work has not been accepted for publication elsewhere, is not being considered for publication elsewhere and does not duplicate material already published. I confirm all authors consent to publication of this Work and authorise the granting of this licence.

1  
2  
3  
4 1 **Development and validation of an early warning score to identify**  
5  
6 2 **COVID-19 in the emergency department based on routine laboratory**  
7  
8  
9 3 **tests: a multicenter case-control study**  
10  
11  
12 4

15 5 Arjen-Kars Boer<sup>1\*</sup>, Ruben Deneer<sup>1,2\*\*†</sup>, Maaïke Maas<sup>3</sup>, Heidi S. M. Ammerlaan<sup>4</sup>, Roland H. H.  
16  
17 6 van Balkom<sup>5</sup>, Wendy A.M.H. Thijssen<sup>3</sup>, Sophie Bennenbroek<sup>3</sup>, Mathie P. G. Leers<sup>6</sup>, Remy  
18  
19 7 J.H. Martens<sup>6</sup>, Madelon M. Buijs<sup>7</sup>, Jos J. Kerremans<sup>8</sup>, Muriël Messchaert<sup>9</sup>, Jeroen D.E. van  
20  
21 8 Suijlen<sup>9</sup>, Natal A.W. van Riel<sup>2,10</sup> and Volkher Scharnhorst<sup>1,2</sup>  
22  
23  
24  
25 9

26  
27  
28 10 \* Both authors contributed equally  
29

30  
31 11 † Corresponding author  
32  
33  
34 12

35  
36  
37 13 1 Department of Laboratory Medicine, Catharina Hospital Eindhoven, Michelangelolaan  
38  
39 14 2, 5623 EJ, Eindhoven, the Netherlands

40  
41 15 2 Faculty of Biomedical Engineering, Technical University Eindhoven, Groene Loper 3,  
42  
43 16 5612 AE, Eindhoven, the Netherlands

44  
45  
46 17 3 Department of Emergency Medicine, Catharina Hospital Eindhoven,  
47  
48 18 Michelangelolaan 2, 5623 EJ, Eindhoven, the Netherlands

49  
50 19 4 Department of Internal Medicine, Catharina Hospital Eindhoven, Michelangelolaan 2,  
51  
52 20 5623 EJ, Eindhoven, the Netherlands

53  
54  
55 21 5 Department of Pulmonary Diseases, Catharina Hospital Eindhoven, Michelangelolaan  
56  
57 22 2, 5623 EJ, Eindhoven, the Netherlands  
58  
59  
60

- 1  
2  
3 23 6 Department of Laboratory Medicine, Zuyderland Medical Center, Dr. H. van der  
4  
5 24 Hoffplein 1, 6162 BG, Sittard-Geleen, the Netherlands  
6  
7 25 7 Atalmedial Diagnostic Centers, Jan Tooropstraat 138, 1061 AD Amsterdam, the  
8  
9 26 Netherlands  
10  
11  
12 27 8 Department of Medical Microbiology & Infection Prevention, Alrijne Hospital, Simon  
13  
14 28 Smitweg 1, 2353 GA Leiderdorp, the Netherlands  
15  
16  
17 29 9 Department of Clinical Chemistry, Gelre Hospital, Albert Schweitzerlaan 31, 7334 DZ  
18  
19 30 Apeldoorn, the Netherlands  
20  
21 31 10 Amsterdam University Medical Centers, University of Amsterdam, Meibergdreef 9,  
22  
23 32 1105 AZ Amsterdam, the Netherlands.  
24  
25  
26  
27 33  
28  
29

### 30 **Keywords**

31  
32 35 COVID-19, SARS-CoV-2, emergency department, triage, early warning score, prediction  
33  
34 36 model, routine laboratory tests  
35  
36  
37  
38  
39  
40

### 41 **Corresponding author**

42  
43 39 Ruben Deneer

44  
45  
46 40 Michelangelolaan 2

47  
48  
49 41 5623 EJ Eindhoven, the Netherlands

50  
51  
52 42 [ruben.deneer@catharinaziekenhuis.nl](mailto:ruben.deneer@catharinaziekenhuis.nl)  
53  
54  
55  
56  
57  
58  
59  
60



## 44 **Abstract**

45 **Objectives:** Identifying patients with a possible SARS-CoV-2 infection in the emergency  
46 department (ED) is challenging. Symptoms differ, incidence rates vary and test capacity may  
47 be limited. As PCR testing all ED patients is neither feasible nor effective in most centers, a  
48 rapid, objective, low-cost early warning score to triage ED patients for a possible infection is  
49 developed.

50 **Design:** Case-control study.

51 **Setting:** Secondary and tertiary hospitals in the Netherlands.

52 **Participants:** Patients presenting at the ED with venous blood sampling from July 2019 to  
53 July 2020 (N = 10417, 279 SARS-CoV-2 positive). The temporal validation cohort covered  
54 the period from July 2020 to October 2021 (N = 14080, 1093 SARS-CoV-2 positive). The  
55 external validation cohort consisted of patients presenting at the ED of three hospitals in the  
56 Netherlands (N = 12061, 652 SARS-CoV-2 positive).

57 **Primary outcome measures** The primary outcome was one or more positive SARS-CoV-2  
58 PCR-test results, within one day prior to, or one week after, ED presentation.

59 **Results:** The resulting “CoLab-score” consists of 10 routine laboratory measurements, and  
60 age. The score showed good discriminative ability (AUC: 0.930, 95% CI: 0.909 to 0.945).  
61 The lowest CoLab-score had a high sensitivity for COVID-19 (0.984, 95% CI: 0.970 to 0.991,  
62 specificity: 0.411, 95% CI: 0.285 to 0.520). Conversely, the highest score had high specificity  
63 (0.978, 95% CI: 0.973 to 0.983, sensitivity: 0.608, 95% CI: 0.522 to 0.685). Results were  
64 confirmed in temporal and external validation.

65 **Conclusions:** The CoLab-score is based on routine laboratory measurements and is available  
66 within one hour after presentation. Depending on the prevalence, COVID-19 may be safely

1  
2  
3 67 ruled-out in over one third of ED presentations. Highly suspect cases can be identified  
4  
5 68 regardless of presenting symptoms. The CoLab-score is continuous, in contrast to the binary  
6  
7  
8 69 outcome of lateral flow testing, and can guide PCR testing and triage ED patients.  
9

10  
11 70

## 13 71 **Article summary**

### 17 72 **Strengths and limitations of this study**

- 19 73 • A comprehensive panel of 28 laboratory tests was measured for 10.417 emergency  
20  
21 74 department (ED) presentations and combined with SARS-CoV-2 PCR test results.
- 23 75 • Using adaptive lasso regression analysis, the panel of 28 laboratory tests was reduced  
24  
25  
26 76 to a single score consisting of a subset of 10 routine ED laboratory tests and age.
- 28 77 • The score was temporally validated from July 2020 to October 2021, in the presence  
29  
30  
31 78 of vaccine roll-out and emergence of new SARS-CoV-2 variants.
- 33 79 • The score was externally validated in 3 other centers in the Netherlands.
- 35 80 • Missingness in the panel of laboratory tests varied between external centers, limiting  
36  
37  
38 81 generalizability of the score to the ED population for which the complete panel of  
39  
40 82 laboratory tests was available.
- 42 83 • The score was not directly compared to lateral flow testing.

## 85 Introduction

86 COVID-19, caused by the severe acute respiratory syndrome coronavirus 2 (SARS-CoV-2),  
87 has evolved into a global pandemic in 2020 [1]. For emergency department (ED) physicians,  
88 identifying presenting patients with a possible COVID-19 infection remains challenging since  
89 symptoms like fever, shortness of breath or coughing overlap with other illnesses [2,3]. It is  
90 crucial however, to identify a possible COVID-19 infection as early as possible. Early  
91 identification prevents further spreading and protects hospital staff by isolating a suspected  
92 patient, pending the results of a SARS-COV-2 RNA PCR test and/or chest CT. Conversely,  
93 when PCR testing or isolation treatment capacity is limited, ruling-out COVID-19 as soon as  
94 possible can save valuable resources.

95 In the era of electronic health records and clinical prediction models, developing an early  
96 warning score that can assist ED physicians in identifying patients presenting at the ED with  
97 COVID-19 is of great value. Moreover, if only routine ED test results are required as input,  
98 the score can be easily adopted by EDs worldwide, potentially reduce diagnostic costs and  
99 accelerate patient triage.

100 Many COVID-19 prediction models have already been developed, the living systematic  
101 review by Wynants et. al [4] provides an extensive overview and critical appraisal.

102 Unfortunately, only few models have found their way into routine care at the ED [5,6]. Early  
103 models were based on relatively small sample sizes, hampered by selection bias or were over-  
104 fitted by selecting too many features [4–6]. Aside from methodological shortcomings of early  
105 models, most models are not developed as an early warning score for all ED patients. Firstly,  
106 they require features from tests that are not routinely performed or logged for all ED patients  
107 (e.g. the CO-RADS score from a CT-scan [7] or non-lab based clinical variables in the  
108 PRIEST EWS [8]) and are therefore not straightforward to implement or scale to a large ED  
109 patient population. Secondly, the population on which models are commonly based, are PCR-

1  
2  
3 110 tested patients, i.e. a pre-selection of a possible COVID-19 infection has already been done by  
4  
5 111 physicians.

6  
7 112 Only two studies were identified that focus on patients presenting at the ED, include  
8  
9  
10 113 unsuspected (and pre-pandemic) patients as controls, and rely solely on routine (laboratory)  
11  
12 114 tests [9,10].

13  
14  
15 115 In this study we report the development and validation of an early warning score that, based  
16  
17 116 on routine ED laboratory tests, estimates the risk of a possible COVID-19 infection in patients  
18  
19 117 who undergo routine laboratory testing at presentation. The score can assist ED physicians in  
20  
21 118 triaging patients and prevent further transmission of COVID-19 by quickly identifying  
22  
23  
24 119 possibly infected patients or ruling out a possible infection when resources are scarce.  
25  
26  
27  
28  
29  
30  
31  
32  
33  
34  
35  
36  
37  
38  
39  
40  
41  
42  
43  
44  
45  
46  
47  
48  
49  
50  
51  
52  
53  
54  
55  
56  
57  
58  
59  
60

## 121 **Methods**

### 122 *Study design*

123 This is a retrospective case-control study where routine laboratory test results, combined with  
124 age and gender, from all patient presenting at the emergency department (ED) of the  
125 Catharina Hospital Eindhoven from July 2019 to July 2020 were combined with SARS-CoV-  
126 2 PCR test results in a development dataset. A model that could predict the presence of a  
127 COVID-19 infection was fit to this dataset. Performance of the model was assessed by i)  
128 internal validation, ii) temporal validation and iii) external validation by using data from the  
129 ED of three other centers. The study was reviewed by the Medical research Ethics  
130 Committees United (MEC-U) under study number W20.071, which confirmed that the  
131 Medical Research Involving Human Subjects Act (In Dutch: WMO) does not apply to this  
132 study. The study was thereafter reviewed and approved by the internal hospital review board.

133

### 134 *Patient and Public Involvement*

135 Patients were not involved in the design, conduct or reporting of this study.

136

### 137 *Development dataset*

138 All ED presentations at the Catharina Hospital Eindhoven from July 2019 to July 2020 were  
139 included in the development dataset, provided that routine laboratory testing had been  
140 requested by the attending ED physician. The rationale for this inclusion period is to limit the  
141 effect of seasonal variation in the ED patient population by including the summer, fall and  
142 winter season of 2019 (control patients) and the winter, spring and summer season of 2020  
143 (case and control patients). The routine laboratory panel at the ED consists of 28 laboratory  
144 tests. In some cases not all tests in the routine panel were requested or one or more

1  
2  
3 145 quantitative results were not available due to analytical interference (hemolysis, lipemia or  
4  
5 146 icterus). The routine ED laboratory panel is requested for (adult) patients presenting with  
6  
7 147 abdominal pain, chest pain, shortness of breath, syncope, sepsis or other non-specific  
8  
9 148 complaints, or for patients (including non-adult patients) presenting with specific complaints  
10  
11 149 where a suspected diagnosis has to be ruled-in or ruled-out. Presentations with one or more  
12  
13 150 missing values in any of the 28 laboratory test in the routine ED panel, were excluded.  
14  
15 151 Presentations with one or more extreme lab results, > 10 times standard deviation from the  
16  
17 152 median, were also excluded to minimize the effect on the estimation of regression  
18  
19 153 coefficients. The median was chosen as a measure of central tendency due to its resistance for  
20  
21 154 outliers. After the first case of COVID-19 in the Netherlands, all patients with symptoms of  
22  
23 155 COVID-19 (either fever and/or respiratory symptoms) were subjected to nasopharyngeal PCR  
24  
25 156 testing for SARS-CoV-2 RNA. PCR testing was performed by commercial tests that were  
26  
27 157 approved by the Dutch national institute of public health (RIVM). If a patient had a positive  
28  
29 158 PCR result in the past, subsequent presentations were excluded as re-presentations might be  
30  
31 159 clinically different from de novo presentations.  
32  
33  
34  
35  
36  
37  
38 160 The ED lab panel results were matched to SARS-CoV-2 PCR results if the underlying  
39  
40 161 nasopharyngeal swab had been taken  $\leq 1$  day prior, or  $\leq 1$  week after initial blood withdrawal  
41  
42 162 at the ED. If multiple PCR tests were performed in this window, and at least one PCR test was  
43  
44 163 positive, the presentation was labelled "*PCR-positive*". If all PCR test results in the time  
45  
46 164 window were negative, the presentation was labelled as "*PCR-negative*". If no PCR tests were  
47  
48 165 performed in the time window and the presentation occurred after the first case of COVID-19  
49  
50 166 in the Netherlands, the presentation was labelled as "*Untested*". All presentations before the  
51  
52 167 first case were labelled as "*Pre-COVID-19*".  
53  
54  
55  
56  
57  
58  
59  
60

### 169 *Laboratory tests*

170 The routine laboratory panel consisted of hemocytometric and chemical analyses. The  
171 hemocytometric tests were performed on Sysmex XN-10 instruments (Sysmex Corp., Kobe,  
172 Japan) and consisted of hemoglobin, hematocrit, erythrocytes, mean corpuscular volume  
173 (MCV), mean cellular hemoglobin (MCH), mean cellular hemoglobin concentration  
174 (MCHC), thrombocytes, leukocytes, neutrophils, eosinophils, basophils, lymphocytes and  
175 monocytes. The chemical analyses were performed on a Cobas 8000 Pro (Roche Dx, Basel,  
176 Switzerland) instrument and consisted of glucose, total bilirubin, aspartate aminotransferase  
177 (ASAT), alanine aminotransferase (ALAT), lactate dehydrogenase (LD), creatine kinase  
178 (CK), alkaline phosphatase (ALP), gamma-glutamyltransferase (gGT), blood urea nitrogen  
179 (BUN), creatinine, CKD-epi estimated glomerular filtration rate (eGFR), potassium, sodium,  
180 chloride, albumin (bromocresol green) and C-reactive protein (CRP). These results were  
181 combined with age and gender.

### 183 *Modelling*

184 All data were processed and analyzed in R version 4.1.1 [11]. Laboratory results, combined  
185 with age and gender were used as covariates in a regression model. Cases were defined as ED  
186 presentations labelled as “*PCR-positive*”, controls were all other presentations (i.e. “*PCR-*  
187 *negative*”, “*Untested*” or “*Pre-COVID-19*”). To achieve predictive accuracy, limit overfitting  
188 and perform feature selection, penalized logistic regression with an adaptive lasso penalty was  
189 chosen [12,13]. To minimize missing data, all non-numeric results at the extremes of the  
190 measuring range, were converted to numeric results by removing the “<” and “>” signs. For  
191 eGFR (CKD-epi) and CRP the raw precursor value was used instead of >90 ml/min/m<sup>2</sup> and  
192 <6 mg/L, respectively. Considering that laboratory results of bilirubin, ASAT, ALAT, LD,  
193 CK, ALP and gGT can have heavy (right) tailed distributions, which in turn impacts model

1  
2  
3 194 predictions, these variables were transformed logarithmically. More details regarding model  
4  
5 195 fitting can be found in the document, **Supplemental Material 1**. Models were fitted using the  
6  
7 196 glmnet-package [14].  
8  
9

10  
11 197

### 12 13 198 *CoLab-score*

14  
15  
16 199 Since this is a retrospective case-control study, the sample prevalence may not reflect the  
17  
18 200 true/current COVID-19 prevalence. To obtain well-calibrated probabilities the intercept term  
19  
20 201 in the model should be adjusted according to the current prevalence (details can be found in  
21  
22 202 the document, **Supplemental Material 1**) [15]. However, adjusting the intercept term is not  
23  
24 203 straightforward to implement in clinical practice, therefore the linear predictor of the model  
25  
26 204 was categorized into a score, this score is hereafter referred to as the “CoLab-score”. The  
27  
28 205 categorization is based on a number needed to test of 15 (i.e. one is willing to PCR test 15  
29  
30 206 patients to find one positive) and prevalence cut-points of 1%, 2%, 5%, 10% and 40% using  
31  
32 207 the intercept adjustment formula by King [15]. The intervals obtained through these breaks  
33  
34 208 correspond to CoLab-scores 5 to 0, respectively. Score 0 reflects low-risk for COVID-19 and  
35  
36 209 score 5 reflects high-risk. More details regarding the rationale of the CoLab-score  
37  
38 210 categorization can be found in the document, **Supplemental Material 1**.  
39  
40  
41  
42  
43  
44  
45

46  
47 211

### 48 212 *Internal validation*

49 213 To assess model performance while taking overfitting into account, bootstrapping was  
50  
51 214 performed. 1000 bootstrap samples were generated from the original data. On each bootstrap  
52  
53 215 sample, the full model fitting procedure and CoLab-score conversion were performed.  
54  
55 216 Optimism adjusted performance measures of the CoLab-score were obtained by applying the  
56  
57 217 0.632 bootstrap rule to the in-sample and out-of-bag-sample performance [16]. Performance  
58  
59  
60



1  
2  
3 218 measures included, AUC, sensitivity, specificity, positive predictive value (PPV) and negative  
4  
5 219 predictive value (NPV) of each CoLab-score. The pROC-package was used to calculate  
6  
7 220 performance measures [17]. Although the full inclusion period from July 2019 to July 2020  
8  
9 221 was used for model fitting, the performance was evaluated on the period starting from the first  
10  
11 222 COVID-19 infection (24<sup>th</sup> of February 2020) to July 2020. This was done to obtain  
12  
13 223 performance measures that would reflect real world performance.  
14  
15  
16  
17  
18 224

### 20 225 *Temporal validation*

22 226 For temporal validation, results from our center were prospectively analyzed from July 2020  
23  
24 227 to October 2021. During this period, the Netherlands was struck by a second wave of COVID-  
25  
26 228 19 infections, starting in the fall of 2020 and subsiding in the summer of 2021. In this period  
27  
28 229 there was also more widespread external PCR testing by municipal health services. The  
29  
30 230 results of external conducted PCR tests were not available to our study. To overcome this  
31  
32 231 limitation, the outcome in the temporal validation cohort was chosen as a composite of the  
33  
34 232 hospital registration of a confirmed COVID-19 infection and/or at least one positive PCR test  
35  
36 233 result. This period also covers both the emergence of new SARS-CoV-2 variants as well as  
37  
38 234 vaccine rollout. However, neither vaccination status nor genomic sequencing was available to  
39  
40 235 determine whether a patient was vaccinated or which variant caused the infection. Therefore,  
41  
42 236 data from the Dutch national institute of public health (RIVM) was used, to divide the  
43  
44 237 temporal validation period into three phases: i) from July 2020 until March 2021, no  
45  
46 238 vaccination and no variants of concern identified ii) from March 2021 until June 2021, partial  
47  
48 239 vaccination and B.1.1.7 (Alpha) variant identified as dominant iii) from June 2021 until  
49  
50 240 October 2021, widespread vaccination and B.1.617.2 (Delta) variant identified as dominant.  
51  
52 241 See **Supplemental Material 2 Figure 1** for more details. The temporal validation consisted  
53  
54 242 of assessing the AUC, sensitivity, specificity, PPV and NPV of each CoLab-score threshold  
55  
56  
57  
58  
59  
60

1  
2  
3 243 for the entire period, as well as for each phase separately to determine a possible effect of  
4  
5 244 vaccination and new variants on performance (results in the **Supplemental Material 2**).  
6  
7 245 Model calibration was assessed graphically using the rms-package [18].  
8  
9

10  
11 246

12  
13  
14 247 *External validation*

15  
16 248 For the external validation, several centers in the Netherlands were approached and assessed  
17  
18 249 if the required panel of laboratory tests and SARS-CoV-2 PCR test results were available.  
19  
20 250 Seven centers responded and three centers fulfilled the inclusion criteria: Gelre Hospitals  
21  
22 251 (center 1), Atalmedial Diagnostic Centers, location Alrijne Hospital Leiderdorp (center 2) and  
23  
24 252 Zuyderland Medical Center (center 3). The hematological parameters were measured with  
25  
26 253 Sysmex XN10/XN20 (center 1), CELL-DYN-Sapphire (Abbott Laboratories) (center 2) and  
27  
28 254 Sysmex XN10 instruments (center 3). The clinical chemistry parameters were measured with  
29  
30 255 Architect c14100/c160000 (Abbott Laboratories) (center 1), Architect ci4100 (Abbott  
31  
32 256 Laboratories) (center 2) and Cobas 8000 instruments (Roche Dx) (center 3). The external  
33  
34 257 validation was similar to the temporal validation and consisted of assessing the AUC  
35  
36 258 sensitivity, specificity, PPV and NPV of each CoLab-score threshold. Calibration was  
37  
38 259 assessed graphically analogous to the temporal validation dataset.  
39  
40  
41  
42  
43  
44  
45  
46  
47  
48  
49  
50  
51  
52  
53  
54  
55  
56  
57  
58  
59  
60

## 261 Results

### 262 Development dataset

263 12879 emergency department (ED) presentations of 10327 patients from July 2019 to July  
 264 2020 were included. After excluding cases with an incomplete lab panel, patient presentations  
 265 that occurred after a positive PCR test in the past (re-presentations) and presentations with  
 266 extreme values (>10 times standard deviation) in any of the lab results, 10417 presentations of  
 267 8610 patients remained (**Figure 1 A**).

|                      | <b>Pre-COVID<br/>N = 5890</b> | <b>Untested<br/>N = 3303</b> | <b>PCR negative<br/>N = 945</b> | <b>PCR positive<br/>N = 279</b> |
|----------------------|-------------------------------|------------------------------|---------------------------------|---------------------------------|
| Age in years         | 61 (21)                       | 60 (21)                      | 66 (18)                         | 69 (15)                         |
| Female gender        | 2909 (49.4 %)                 | 1659 (50.2 %)                | 466 (49.3 %)                    | 95 (34.1 %)                     |
| Specialism           |                               |                              |                                 |                                 |
| Internal medicine    | 1648 (28.0 %)                 | 896 (27.1 %)                 | 244 (25.8 %)                    | 71 (25.4 %)                     |
| Surgery              | 1007 (17.1 %)                 | 679 (20.6 %)                 | 51 (5.4 %)                      | 5 (1.8 %)                       |
| Neurology            | 775 (13.2 %)                  | 468 (14.2 %)                 | 64 (6.8 %)                      | 5 (1.8 %)                       |
| Pulmonary medicine   | 714 (12.1 %)                  | 220 (6.7 %)                  | 326 (34.5 %)                    | 167 (59.9 %)                    |
| Cardiology           | 560 (9.5 %)                   | 322 (9.7 %)                  | 145 (15.3 %)                    | 6 (2.2 %)                       |
| Urology              | 309 (5.2 %)                   | 148 (4.5 %)                  | 15 (1.6 %)                      | 7 (2.5 %)                       |
| Gastroenterology     | 306 (5.2 %)                   | 224 (6.8 %)                  | 27 (2.9 %)                      | 1 (0.4 %)                       |
| Geriatrics           | 189 (3.2 %)                   | 95 (2.9 %)                   | 52 (5.5 %)                      | 15 (5.4 %)                      |
| Orthopedics          | 147 (2.5 %)                   | 109 (3.3 %)                  | 11 (1.2 %)                      | 0 (0.0 %)                       |
| Gynecology           | 118 (2.0 %)                   | 82 (2.5 %)                   | 2 (0.2 %)                       | 0 (0.0 %)                       |
| Other                | 117 (2.0 %)                   | 60 (1.8 %)                   | 8 (0.8 %)                       | 2 (0.7 %)                       |
| Hemoglobin in mmol/L | 8.2 (1.3)                     | 8.3 (1.3)                    | 8.2 (1.4)                       | 8.6 (1.1)                       |
| Hematocrit in L/L    | 0.403 (0.059)                 | 0.405 (0.056)                | 0.405 (0.062)                   | 0.417 (0.047)                   |
| Erythrocytes in /pL  | 4.41 (0.69)                   | 4.43 (0.66)                  | 4.41 (0.72)                     | 4.61 (0.60)                     |
| MCV in fl            | 91.8 (6.4)                    | 91.9 (6.1)                   | 92.4 (6.7)                      | 90.7 (5.5)                      |
| MCH in mmol          | 1.859 (0.157)                 | 1.876 (0.150)                | 1.874 (0.172)                   | 1.869 (0.141)                   |
| MCHC in mmol/L       | 20.2 (0.9)                    | 20.4 (0.9)                   | 20.3 (1.0)                      | 20.6 (0.8)                      |
| Thrombocytes in /nL  | 263 (99)                      | 266 (100)                    | 269 (105)                       | 217 (123)                       |
| Leukocytes in /nL    | 9.30 [7.06, 12.16]            | 8.92 [7.01, 11.89]           | 9.66 [7.17, 12.94]              | 6.33 [4.74, 8.48]               |
| Neutrophils in /nL   | 6.62 [4.51, 9.53]             | 6.10 [4.42, 8.94]            | 7.01 [4.79, 10.02]              | 4.71 [3.30, 6.94]               |
| Eosinophils in /nL   | 0.09 [0.03, 0.17]             | 0.09 [0.03, 0.18]            | 0.08 [0.02, 0.17]               | 0.00 [0.00, 0.02]               |
| Basophils in /nL     | 0.04 [0.02, 0.05]             | 0.04 [0.02, 0.05]            | 0.04 [0.02, 0.05]               | 0.01 [0.01, 0.02]               |
| Lymphocytes in /nL   | 1.47 [0.93, 2.13]             | 1.56 [1.05, 2.18]            | 1.31 [0.80, 2.03]               | 0.86 [0.59, 1.21]               |
| Monocytes in /nL     | 0.70 [0.52, 0.93]             | 0.69 [0.52, 0.91]            | 0.74 [0.54, 1.01]               | 0.45 [0.32, 0.64]               |
| Glucose in mmol/L    | 6.76 [5.83, 8.39]             | 6.68 [5.76, 8.14]            | 6.98 [5.95, 8.85]               | 6.77 [5.98, 8.48]               |
| Bilirubin in umol/L  | 7.5 [5.0, 11.6]               | 7.4 [5.1, 10.9]              | 8.3 [5.6, 12.4]                 | 8.2 [6.3, 11.4]                 |
| ASAT in U/L          | 24.0 [19.1, 32.2]             | 26.5 [21.6, 35.1]            | 27.7 [21.7, 39.2]               | 40.7 [30.2, 57.2]               |
| ALAT in U/L          | 24.3 [17.8, 35.3]             | 25.3 [18.4, 36.2]            | 25.7 [18.4, 40.0]               | 33.7 [23.3, 50.0]               |
| LD in U/L            | 201 [173, 240]                | 198 [170, 236]               | 215 [178, 263]                  | 300 [238, 403]                  |
| CK in U/L            | 82 [51, 134]                  | 83 [52, 136]                 | 76 [51, 125]                    | 124 [62, 222]                   |
| ALP in IU/L          | 83.0 [68.0, 105.0]            | 81.0 [65.8, 102.5]           | 86.9 [67.9, 110.0]              | 71.0 [58.8, 85.0]               |
| gGT in U/L           | 27.0 [17.0, 53.0]             | 28.4 [18.4, 50.5]            | 37.0 [22.4, 68.9]               | 42.0 [28.0, 83.5]               |
| BUN in mmol/L        | 5.7 [4.3, 8.0]                | 5.8 [4.3, 7.8]               | 6.2 [4.6, 9.4]                  | 6.1 [4.7, 8.9]                  |

|                                  |                   |                    |                   |                   |
|----------------------------------|-------------------|--------------------|-------------------|-------------------|
| CKD-epi in ml/min/m <sup>2</sup> | 80.9 [58.0, 99.1] | 85.0 [63.5, 103.3] | 79.1 [52.1, 96.6] | 76.6 [54.9, 91.2] |
| Potassium in mmol/L              | 4.06 (0.50)       | 4.03 (0.49)        | 4.07 (0.55)       | 3.91 (0.47)       |
| Sodium in mmol/L                 | 139.2 (4.0)       | 138.5 (3.9)        | 138.0 (4.3)       | 136.4 (4.1)       |
| Chloride in mmol/L               | 104.4 (4.6)       | 103.8 (4.5)        | 102.9 (4.8)       | 101.6 (4.4)       |
| Albumin in g/L                   | 42.4 (4.9)        | 42.3 (4.5)         | 40.8 (4.8)        | 38.4 (3.8)        |
| CRP in mg/L                      | 8 [2, 41]         | 5 [1, 30]          | 18 [3, 69]        | 77 [37, 136]      |

268

269 **Table 1: Descriptive statistics of development dataset and laboratory concentrations.**

270 *Shown are the laboratory tests routinely requested at ED presentation and their mean/median*  
 271 *results (in the development dataset) for the presentations before the first COVID-19 patient in*  
 272 *the Netherlands (“Pre-COVID-19”), presentations thereafter that were not tested for*  
 273 *COVID-19 (“Untested”), tested negatively (“PCR negative”) and tested positive (“PCR*  
 274 *positive”). For results with normal distributions, the mean value and standard deviation (in*  
 275 *round brackets) are shown. For results that have skewed or heavy tailed distributions, the*  
 276 *median value and the interquartile range is shown [in squared brackets]. Dark grey marked*  
 277 *figures indicate a clinically relevant difference from the Pre-COVID-19 category (based on*  
 278 *the total allowable error).*

279

280 Descriptive statistics of ED presentations are shown in **Table 1**, dark grey marked figures  
 281 indicate a clinically relevant difference from the Pre-COVID-19 category (based on the total  
 282 allowable error [19]). For the PCR positives (N = 279), 91% (95% CI: 88 to 94%) of the cases  
 283 were tested positive in their first PCR. The remaining 24 patients were positive in their second  
 284 (N = 18), third (N = 5) or fourth (N = 1) PCR.

285

286 **CoLab-score**

287 The model obtained through adaptive lasso regression contained eleven variables, which are  
 288 depicted with their regression coefficients (weights) in **Table 2**.

| Variable                                      | $\beta$  | Exclusion limit            | Relative importance |
|-----------------------------------------------|----------|----------------------------|---------------------|
| Intercept                                     | -6.885   |                            | -                   |
| Erythrocytes /pL                              | 0.9379   | Erythrocytes < 2.9 /pL     | 52 %                |
| Leukocytes /nL                                | -0.1298  |                            | 46 %                |
| Eosinophils /nL                               | -6.834   |                            | 86 %                |
| Basophils /nL                                 | -47.70   | Basophils >0.33 /nL        | 100 %               |
| log <sub>10</sub> of Bilirubin in $\mu$ mol/L | -1.142   | Bilirubin >169 $\mu$ mol/L | 26 %                |
| log <sub>10</sub> of LD in U/L                | 5.369    | LD >1564 U/L               | 58 %                |
| log <sub>10</sub> of ALP in IU/L              | -3.114   | AF >1000 IU/L              | 45 %                |
| log <sub>10</sub> of gGT in U/L               | 0.3605   | gGT >1611 U/L              | 11 %                |
| Albumin in g/L                                | -0.1156  |                            | 45 %                |
| CRP in mg/L                                   | 0.002560 |                            | 15 %                |
| Age in years                                  | 0.002275 |                            | 4 %                 |

289

### 290 **Table 2: Calculation of the CoLab-linear predictor (LP).**

291 *The CoLab-linear predictor (LP) is calculated by summing the intercept and the products of*  
 292 *the 11 variables with their corresponding coefficients ( $\beta$ 's). CoLab-LP = - 6.885 +*  
 293 *[erythrocytes]  $\times$  0.9379 - [leukocytes]  $\times$  0.1298 - [eosinophils]  $\times$  6.834 - [basophils]  $\times$*   
 294 *47.7 - log<sub>10</sub>([bilirubin])  $\times$  1.142 + log<sub>10</sub>([LD])  $\times$  5.369 - log<sub>10</sub>([ALP])  $\times$  3.114 +*  
 295 *log<sub>10</sub>([gGT])  $\times$  0.3605 - [albumin]  $\times$  0.1156 + [CRP]  $\times$  0.02560 + [age]  $\times$  0.002275. The*  
 296 *LP can be converted into a CoLab-score (see Figure 2) or into a probability if the prevalence*  
 297 *is known or estimated (see details in Supplemental Material 1). The CoLab-score is not valid*  
 298 *if any of the variables exceed the limits in the third column. The relative importance ranks the*  
 299 *importance of variables in predicting the outcome, relative to the most important variable (in*  
 300 *this case basophils).*

301

302 A larger  $\beta$ -coefficient does not imply that a variable is more important in predicting the odds  
 303 of testing positive for SARS-CoV-2, since variables are on different scales. The most  
 304 important variables are basophiles, eosinophils and lactate dehydrogenase (LD).

As shown in **Figure 2**, the linear predictor clearly discriminates between COVID-19 and non-COVID-19. The linear predictor is converted to CoLab-scores 0 – 5 with the cut-points depicted in **Figure 2**.

308

### 309 *Internal validation*

The model was validated in the period starting from the first COVID-19 infection to July 2020, in this period the mean prevalence was 7.2%. The AUC of the CoLab-score is 0.930 (95% CI: 0.909 to 0.945).

| CoLab-score | Sensitivity              | Specificity              | PPV                      | NPV                      | TP                       | TN                          | FP                          | FN                      | % of population       |
|-------------|--------------------------|--------------------------|--------------------------|--------------------------|--------------------------|-----------------------------|-----------------------------|-------------------------|-----------------------|
| 0           | 0.984<br>(0.969 - 0.991) | 0.410<br>(0.302 - 0.543) | 0.115<br>(0.094 - 0.147) | 0.997<br>(0.993 - 0.999) | 273.4<br>(241.2 - 304.4) | 1470.9<br>(1081.1 - 1950.9) | 2119.1<br>(1633.5 - 2507.6) | 4.6<br>(2.6 - 8.6)      | 38.0<br>(28.0 - 51.0) |
| ≤ 1         | 0.912<br>(0.892 - 0.952) | 0.785<br>(0.741 - 0.827) | 0.248<br>(0.207 - 0.300) | 0.991<br>(0.989 - 0.995) | 253.5<br>(226.5 - 287.0) | 2817.1<br>(2655.4 - 2961.2) | 772.9<br>(623.2 - 934.5)    | 24.5<br>(13.4 - 30.2)   | 73.3<br>(69.3 - 77.3) |
| ≤ 2         | 0.856<br>(0.816 - 0.895) | 0.880<br>(0.864 - 0.900) | 0.357<br>(0.315 - 0.415) | 0.988<br>(0.984 - 0.991) | 238.1<br>(209.6 - 267.9) | 3160.8<br>(3100.7 - 3233.7) | 429.1<br>(357.3 - 487.1)    | 39.9<br>(28.5 - 52.4)   | 82.9<br>(80.9 - 83.9) |
| ≤ 3         | 0.757<br>(0.706 - 0.809) | 0.951<br>(0.944 - 0.959) | 0.546<br>(0.496 - 0.604) | 0.981<br>(0.976 - 0.985) | 210.4<br>(183.4 - 240.2) | 3415.1<br>(3378.0 - 3456.4) | 174.9<br>(147.0 - 199.3)    | 67.6<br>(51.9 - 84.9)   | 90.0<br>(89.0 - 91.0) |
| ≤ 4         | 0.612<br>(0.530 - 0.706) | 0.978<br>(0.972 - 0.983) | 0.683<br>(0.628 - 0.746) | 0.970<br>(0.963 - 0.978) | 170.2<br>(141.6 - 204.9) | 3510.6<br>(3476.8 - 3547.5) | 79.4<br>(60.3 - 100.4)      | 107.9<br>(79.1 - 134.0) | 93.7<br>(91.7 - 93.7) |

313

### 314 **Table 3: Bootstrapped diagnostic performance of the CoLab-score in the development** 315 **dataset.**

316 *The development dataset was internally validated for the period March 2020 – July 2020 (N = 3868). The optimism-adjusted bootstrapped sensitivities, specificities, positive predictive values (PPV), negative predictive values (NPV), true positives (TP), true negatives (TN), false positives (FP) and false negatives (FN) and fraction of presentations (%) are shown for fixed*  
319 *cut-offs (CoLab-score 0 till ≤ 4). The numbers in round brackets represent the 95% optimism-*  
320 *adjusted*

1  
2  
3 321 *adjusted bootstrapped confidence intervals. The first column defines the threshold above*  
4  
5 322 *which CoLab-score a patient is considered positive. Note that “0” lists the sensitivity and*  
6  
7 323 *NPV of CoLab-score 0 and “ $\leq 4$ ” lists the specificity and PPV of CoLab-score 5. Also note*  
8  
9 324 *that TP, TN, FP and FN are not whole numbers, as these are obtained through bootstrapping*  
10  
11 325 *and each bootstrap replicate contains a different number of controls and cases.*  
12  
13  
14  
15 326

16  
17  
18 327 Diagnostic performance is shown in **Table 3**. A CoLab-score of 0 has a negative predictive  
19  
20 328 value (NPV) of 0.997 (95% CI: 0.993 to 0.999) and positive predictive value (PPV) of 0.115  
21  
22 329 (0.0934 - 0.147), one third (38%, 95% CI: 28 to 514%) of all ED presentations were assigned  
23  
24 330 this score and can therefore be safely excluded. Conversely, 6% (95% CI: 6 to 8%) of the ED  
25  
26 331 patients had a CoLab-score = 5. Given the PPV of this score (0.683, 95% CI: 0.628 to 0.746,  
27  
28 332 NPV: 0.970, 95% CI: 0.963 - 0.978), subsequent PCR testing is advised.  
29  
30  
31  
32  
33  
34

### 35 334 *Temporal validation*

36  
37 335 As the CoLab-score was developed in our center after the first COVID-19-wave in the  
38  
39 336 Netherlands, the performance was evaluated in our center from July 2020 until October 2021.  
40  
41 337 Lab results from 17489 ED presentations were collected. After applying the inclusion flow as  
42  
43 338 shown in **Figure 1 B**, 14080 presentations remained, of which 1039 were associated with a  
44  
45 339 COVID-19 infection.  
46  
47  
48  
49

50 340 The mean prevalence in this period was 7.4%. The AUC of the CoLab-score in the temporal  
51  
52 341 validation set is 0.916 (95% CI: 0.906 to 0.927). The performance is comparable to the  
53  
54 342 development cohort, although sensitivity is slightly lower and specificity slightly higher (cf.  
55  
56 343 **Table 3** and **Table 4**). The temporal validation dataset was also split into three phases  
57  
58 344 according to dominant SARS-CoV-2 variants and vaccine roll-out (see **Supplemental**  
59  
60

1  
2  
3 345 **Material 2 Figure 1**). The discriminative ability was not lower in the second or third phase,  
4  
5 346 compared to the first phase. Diagnostic performance is preserved in terms of sensitivity and  
6  
7 347 specificity, except a moderately reduced sensitivity of scores  $\geq 3$  in the third phase as  
8  
9 348 compared to the first phase. PPV and NPV are incomparable due to different prevalence/pre-  
10  
11 349 test probabilities in each phase (see **Supplemental Material 2 Table 1**).

12  
13  
14  
15 350 In terms of the predicted probabilities, model calibration shows that overall predicted  
16  
17 351 probabilities are too low (see **Supplemental Material 3 Figure 1** for the calibration plot),  
18  
19 352 which is expected since the prevalence differs and the intercept has to be adjusted to the  
20  
21 353 prevalence.

22  
23  
24 354 In this period at least 22 COVID-19 positive patients were identified by the CoLab-score, that  
25  
26 355 initially did not present with COVID-specific symptoms. Most patients had neurological or  
27  
28 356 orthopedic presenting symptoms.

29  
30  
31  
32 357

### 33 34 35 358 *External validation*

36  
37 359 For external validation, data obtained from three other centers were used, center 1 (N = 1284,  
38  
39 360 52 COVID-19 positive), center 2 (N = 2899, 99 COVID-19 positive) and center 3 (N = 3545,  
40  
41 361 336 COVID-19 positive). The inclusion flow is summarized in **Figure 3**. COVID-19  
42  
43 362 prevalence differed between the three centers (4.0%, 3.4% and 9.5% respectively) and was  
44  
45 363 lower in centers 1 and 2, and higher in center 3 than in the development dataset. The AUCs of  
46  
47 364 the CoLab-score are 0.904 (95% CI: 0.866 to 0.942), 0.886 (95% CI: 0.851 - 0.922) and 0.891  
48  
49 365 (95% CI: 0.872 - 0.909), for centers 1, 2, and 3 respectively.

50  
51  
52  
53  
54 366 Diagnostic performance is shown in **Table 4**. The sensitivity of CoLab-score 0 in all centers  
55  
56 367 is  $\geq 0.96$ . Therefore, the NPV of CoLab-score 0 was more than 99%. Calibration plots for  
57  
58 368 external centers are shown in **Supplemental Material 3 Figure 1**, the observed fraction of  
59  
60



369 COVID-19 positives is slightly lower than expected in centers 1 and 2. For center 3, low  
 370 probabilities appear slightly underestimated and high probabilities slightly overestimated.

| CoLab-score | Validation set | Sensitivity              | Specificity              | PPV                      | NPV                      | TP                   | TN                       | FP                    | FN                 |
|-------------|----------------|--------------------------|--------------------------|--------------------------|--------------------------|----------------------|--------------------------|-----------------------|--------------------|
| 0           | Temporal       | 0.967<br>(0.956 - 0.978) | 0.420<br>(0.411 - 0.428) | 0.117<br>(0.115 - 0.119) | 0.994<br>(0.992 - 0.996) | 1005<br>(993 - 1016) | 5476<br>(5366 - 5587)    | 7565<br>(7454 - 7675) | 34<br>(23 - 46)    |
|             | Center 1       | 1.000<br>(1.000 - 1.000) | 0.331<br>(0.307 - 0.358) | 0.059<br>(0.057 - 0.061) | 1.000<br>(1.000 - 1.000) | 52<br>(52 - 52)      | 410<br>(380 - 443)       | 827<br>(794 - 857)    | 0<br>(0 - 0)       |
|             | Center 2       | 0.961<br>(0.922 - 0.990) | 0.351<br>(0.333 - 0.369) | 0.052<br>(0.049 - 0.054) | 0.996<br>(0.992 - 0.999) | 99<br>(95 - 102)     | 985<br>(935 - 1035)      | 1823<br>(1773 - 1873) | 4<br>(1 - 8)       |
|             | Center 3       | 0.970<br>(0.950 - 0.988) | 0.322<br>(0.306 - 0.338) | 0.130<br>(0.126 - 0.133) | 0.991<br>(0.984 - 0.996) | 327<br>(320 - 333)   | 1042<br>(991 - 1092)     | 2193<br>(2143 - 2244) | 10<br>(4 - 17)     |
|             | Temporal       | 0.888<br>(0.870 - 0.908) | 0.791<br>(0.783 - 0.798) | 0.253<br>(0.245 - 0.261) | 0.989<br>(0.987 - 0.991) | 923<br>(904 - 943)   | 10311<br>(10215 - 10401) | 2730<br>(2640 - 2826) | 116<br>(96 - 135)  |
|             | Center 1       | 0.923<br>(0.846 - 0.981) | 0.694<br>(0.669 - 0.720) | 0.113<br>(0.101 - 0.124) | 0.995<br>(0.991 - 0.999) | 48<br>(44 - 51)      | 858<br>(828 - 891)       | 379<br>(346 - 409)    | 4<br>(1 - 8)       |
| ≤ 1         | Center 2       | 0.913<br>(0.854 - 0.961) | 0.678<br>(0.661 - 0.696) | 0.094<br>(0.087 - 0.101) | 0.995<br>(0.992 - 0.998) | 94<br>(88 - 99)      | 1905<br>(1857 - 1953)    | 903<br>(855 - 951)    | 9<br>(4 - 15)      |
|             | Center 3       | 0.914<br>(0.881 - 0.944) | 0.674<br>(0.657 - 0.691) | 0.226<br>(0.216 - 0.236) | 0.987<br>(0.982 - 0.991) | 308<br>(297 - 318)   | 2180<br>(2126 - 2234)    | 1055<br>(1001 - 1109) | 29<br>(19 - 40)    |
|             | Temporal       | 0.820<br>(0.796 - 0.843) | 0.894<br>(0.889 - 0.899) | 0.382<br>(0.367 - 0.396) | 0.984<br>(0.982 - 0.986) | 852<br>(827 - 876)   | 11661<br>(11591 - 11729) | 1380<br>(1312 - 1450) | 187<br>(163 - 212) |
| ≤ 2         | Center 1       | 0.808<br>(0.692 - 0.904) | 0.811<br>(0.788 - 0.832) | 0.152<br>(0.129 - 0.176) | 0.990<br>(0.984 - 0.995) | 42<br>(36 - 47)      | 1003<br>(975 - 1029)     | 234<br>(208 - 262)    | 10<br>(5 - 16)     |
|             | Center 2       | 0.845<br>(0.777 - 0.913) | 0.801<br>(0.785 - 0.815) | 0.135<br>(0.122 - 0.147) | 0.993<br>(0.990 - 0.996) | 87<br>(80 - 94)      | 2248<br>(2205 - 2289)    | 560<br>(519 - 603)    | 16<br>(9 - 23)     |
|             | Center 3       | 0.890<br>(0.855 - 0.923) | 0.794<br>(0.779 - 0.808) | 0.311<br>(0.294 - 0.328) | 0.986<br>(0.981 - 0.990) | 300<br>(288 - 311)   | 2569<br>(2521 - 2615)    | 666<br>(620 - 714)    | 37<br>(26 - 49)    |
| ≤ 3         | Temporal       | 0.710<br>(0.682 - 0.738) | 0.962<br>(0.958 - 0.965) | 0.596<br>(0.573 - 0.618) | 0.977<br>(0.974 - 0.979) | 738<br>(709 - 767)   | 12540<br>(12496 - 12582) | 501<br>(459 - 545)    | 301<br>(272 - 330) |
|             | Center 1       | 0.750<br>(0.635 - 0.865) | 0.909<br>(0.892 - 0.925) | 0.257<br>(0.213 - 0.306) | 0.989<br>(0.983 - 0.994) | 39<br>(33 - 45)      | 1124<br>(1104 - 1144)    | 113<br>(93 - 133)     | 13<br>(7 - 19)     |
|             | Center 2       | 0.660<br>(0.563 - 0.748) | 0.897<br>(0.885 - 0.908) | 0.190<br>(0.163 - 0.218) | 0.986<br>(0.983 - 0.990) | 68<br>(58 - 77)      | 2519<br>(2486 - 2549)    | 289<br>(259 - 322)    | 35<br>(26 - 45)    |

| CoLab-score | Validation set | Sensitivity              | Specificity              | PPV                      | NPV                      | TP                 | TN                       | FP                 | FN                 |
|-------------|----------------|--------------------------|--------------------------|--------------------------|--------------------------|--------------------|--------------------------|--------------------|--------------------|
| ≤ 4         | Center 3       | 0.766<br>(0.718 - 0.810) | 0.887<br>(0.876 - 0.898) | 0.413<br>(0.386 - 0.442) | 0.973<br>(0.968 - 0.978) | 258<br>(242 - 273) | 2869<br>(2835 - 2905)    | 366<br>(330 - 400) | 79<br>(64 - 95)    |
|             | Temporal       | 0.585<br>(0.556 - 0.615) | 0.984<br>(0.982 - 0.987) | 0.750<br>(0.724 - 0.778) | 0.968<br>(0.965 - 0.970) | 608<br>(578 - 639) | 12838<br>(12811 - 12866) | 203<br>(175 - 230) | 431<br>(400 - 461) |
|             | Center 1       | 0.654<br>(0.519 - 0.788) | 0.951<br>(0.939 - 0.962) | 0.359<br>(0.293 - 0.435) | 0.985<br>(0.979 - 0.991) | 34<br>(27 - 41)    | 1176<br>(1161 - 1190)    | 61<br>(47 - 76)    | 18<br>(11 - 25)    |
|             | Center 2       | 0.534<br>(0.437 - 0.621) | 0.952<br>(0.943 - 0.959) | 0.287<br>(0.239 - 0.339) | 0.982<br>(0.979 - 0.986) | 55<br>(45 - 64)    | 2672<br>(2649 - 2693)    | 136<br>(115 - 159) | 48<br>(39 - 58)    |
|             | Center 3       | 0.665<br>(0.611 - 0.718) | 0.930<br>(0.921 - 0.938) | 0.497<br>(0.462 - 0.534) | 0.964<br>(0.958 - 0.969) | 224<br>(206 - 242) | 3008<br>(2980 - 3036)    | 227<br>(199 - 255) | 113<br>(95 - 131)  |

371  
 372 **Table 4: Diagnostic performance of the CoLab-score in the validation dataset (temporal)**  
 373 **and three external hospitals.**  
 374 *Sensitivities, specificities, positive predictive values (PPV), negative predictive values (NPV),*  
 375 *true positives (TP), true negatives (TN), false positives (FP) and false negatives (FN) are*  
 376 *shown for fixed cut-offs (CoLab-score 0 till ≤ 4) with bootstrapped 95% confidence intervals*  
 377 *in parentheses. Note that “0” lists the sensitivity and NPV of CoLab-score 0 and “≤ 4” lists*  
 378 *the specificity and PPV of CoLab-score 5.*

## 380 Discussion

381 Given the impact of COVID-19 on society and healthcare, there is a need for simple and fast  
382 detection of patients with a possible COVID-19 infection in the ED. The CoLab-score  
383 described in this study, is a fast and accurate risk score to triage patients presenting at the ED  
384 based on ten routine blood biomarkers and age.

385 The main strength of this study is that this score can be used as an early-warning or triaging  
386 tool for the ED population presenting with abdominal pain, chest pain, shortness of breath,  
387 syncope, sepsis or other non-specific complaints where a routine blood panel is requested.  
388 This is in contrast to the vast majority of COVID-19 diagnostic models that have been  
389 developed on a pre-selected population of PCR-tested patients [9,20–26]. Moreover, the  
390 CoLab-score requires only routine blood tests, instead of (features from) imaging such as CT-  
391 scans or laboratory tests that are not routinely collected in the ED, e.g. interleukin-6 or 3-  
392 hydroxybuteric acid [4]. Compared to lateral flow tests (LFTs), which provide a dichotomous  
393 result within 30 minutes and are widely adopted in EDs, the CoLab-score is a continuous  
394 score. The lowest CoLab-scores (0 - 1) offer higher sensitivity and are therefore more suitable  
395 to rule-out COVID-19 than a LFT, which are only moderately sensitive (albeit more specific)  
396 [27,28].

397 Two other studies have been published which are similar to this study [9,10]. Interestingly,  
398 the study by Soltan et al., ranked basophils and eosinophils as the two most important features  
399 in predicting the outcome, similar to our results [10]. Eosinophils were also seen as one of the  
400 most important features by Plante et al. [9]. However, both studies focus on an artificial  
401 intelligence/machine learning approach. While their approach likely results in higher  
402 predictive performance, due to the ability of machine learning models to capture non-linear  
403 and interaction effects, the goal of this study was to develop a simple, fast and robust model  
404 that can easily be implemented in current hospital IT systems.

1  
2  
3 405 Since this is a retrospective case-control study, there is some unavoidable missing data. In our  
4  
5 406 cohort 17.6% of the ED presentations could not be used due to one or more missing  
6  
7 407 laboratory results. This is lower or equal to similar studies; 22% [23], 17% [21] and 11% [26].  
8  
9 408 Important to note is that 7.7% of missingness is due to analytical errors which can be assumed  
10  
11 409 to be missing completely at random. For the remaining 9.9% of missingness, the full lab panel  
12  
13 410 was most frequently missing for pediatric, obstetric and surgery patients. These patients are  
14  
15 411 presenting with specific complaints for which specific laboratory tests are requested, and  
16  
17 412 hence do not match the inclusion criteria for a routine blood panel. Overall the missingness  
18  
19 413 was significantly lower in the PCR-tested group versus the untested group ( $\chi^2$ -test p-value  
20  
21 414 <0.001). It is assumed that all presentations in the untested group are COVID-19 negative.  
22  
23 415 However, some presentations with asymptomatic COVID-19 could be present in the untested  
24  
25 416 control group. The impact of these 'false controls' is most likely small as other studies  
26  
27 417 indicate that there is a very low positivity rate among asymptomatic ED presentations (only a  
28  
29 418 few in over a thousand tested asymptomatic cases) [29,30]. The vast majority of controls were  
30  
31 419 not tested for COVID-19, because they were either pre-pandemic or untested patients (89% in  
32  
33 420 the development dataset). Clinical data always contains some unavoidable 'noise' in the form  
34  
35 421 of misregistrations, misdiagnoses or patients who were missed. We have tried to mitigate this  
36  
37 422 by including a large pre-pandemic control group and including all PCR tests within 1 week  
38  
39 423 after discharge.

40  
41 424 In the external centers, there is a high level of missingness as a result of an incomplete  
42  
43 425 laboratory panel. In the case of centers 1 and 2, only internal medicine ED presentations were  
44  
45 426 tested with a laboratory panel containing the 10 tests required for the CoLab-score. The ED  
46  
47 427 lab panel of other disciplines (e.g. urology, surgery or pediatrics) differed and did not contain  
48  
49 428 the required tests. Nevertheless, the majority of COVID-19 patients were internal medicine  
50  
51 429 ED presentations, which is reflected by the few PCR-positive patients excluded. Due to these  
52  
53  
54  
55  
56  
57  
58  
59  
60

1  
2  
3 430 high levels of missingness, the results of the external centers cannot be used to show that the  
4  
5 431 CoLab-score generalizes to the entire ED population. Rather, the results show that for the  
6  
7 432 majority of COVID-19 positive patients presenting at the ED, a routine laboratory panel is  
8  
9 433 available from which the CoLab-score can be calculated, and that the performance of the  
10  
11 434 CoLab-score in this population is comparable to the development population. Differences in  
12  
13 435 the distribution of CoLab variables between centers are shown in **Supplemental Material 3**  
14  
15 436 **Figure 2.**

16  
17  
18  
19  
20 437 The performance of the CoLab-score is affected by the time between the onset of symptoms  
21  
22 438 and ED presentations. The score increases with the duration of symptoms and gradually  
23  
24 439 decreases after day 7 (see **Supplemental Material 4 Figure 1** for a plot of the duration of  
25  
26 440 COVID-19 related symptoms and the CoLab-linear predictor). As a consequence, some  
27  
28 441 COVID-19 patients with early or late presentation after onset of symptoms can be missed.  
29  
30 442 Optimal performance of the CoLab-score is achieved when the onset of symptoms is >1 and  
31  
32 443 <10 days prior to ED presentation. Chemotherapy that causes myeloid suppression, will  
33  
34 444 decrease neutrophilic, basophilic and eosinophilic counts and thereby “falsely” increasing the  
35  
36 445 CoLab-score. Conversely, COVID-19 patients with severe anemia could have “falsely”  
37  
38 446 lowered CoLab-scores. To minimize false negatives, we have therefore advised to report  
39  
40 447 CoLab-scores only when the concentration of erythrocytes is  $\geq 2.9$  /pL.

41  
42  
43  
44  
45 448 It was chosen to exclude re-presentations after a previous presentation with COVID-19. Since  
46  
47 449 the median time between initial presentation and re-presentation was 12 days, these patients  
48  
49 450 were most likely not re-infected patients, but patients who deteriorated after initial  
50  
51 451 presentation/treatment. Given that the CoLab-score follows the host-immune response, the  
52  
53 452 score is time sensitive (see **Supplemental Material 4 Figure 1**). Including these patients  
54  
55 453 would impact the performance of the CoLab-score as patients in a later phase of the disease  
56  
57 454 show different biomarker profiles. The CoLab-score is aimed towards alerting clinicians to

1  
2  
3 455 patients presenting with a novel SARS-CoV-2 infection, rather than patients who deteriorate  
4  
5 456 after treatment for COVID-19. Other re-presentations were not excluded, which results in  
6  
7 457 some patients appearing multiple times in a dataset. This was not adjusted for in the  
8  
9  
10 458 regression model since the assumption was made that ED presentations are independent  
11  
12 459 observations. The median time between re-presentations is 38 days, most likely resulting in  
13  
14 460 variations in laboratory results between presentations, and hence, little to no correlation  
15  
16  
17 461 between presentations. A sensitivity analysis was performed whereby only the first  
18  
19 462 presentation was included for each patient (**Supplemental Material 4 Table 1**), but no  
20  
21 463 difference was found in performance in terms of sensitivity, specificity and AUC.  
22  
23  
24 464 The CoLab-score does not serve as a replacement for PCR-testing or LFTs, and can be used to  
25  
26 465 guide PCR-testing when routine blood tests are available. Important to note is that the CoLab-  
27  
28 466 score is only valid for ED presentations where routine blood testing is requested, and as a  
29  
30 467 consequence does not generalize to the ED population who is otherwise well and does not  
31  
32 468 undergo routine blood testing. Using the CoLab-score in a symptomatic/PCR-tested cohort  
33  
34 469 also results in different diagnostic performance characteristics, as compared to using the score  
35  
36 470 on the full ED cohort (see **Supplemental Material 4 Table 1**).  
37  
38  
39  
40  
41 471 Finally, the CoLab-score could lead to false positives by other viral infections. However, in an  
42  
43 472 historic patient cohort, the CoLab-score had only limited discriminative ability in separating  
44  
45 473 influenza-PCR-negative from influenza-PCR-positive patients (see **Supplemental Material 4**  
46  
47 474 **Figure 2**) implying specificity for SARS-CoV-2. Since the CoLab-score reflects the host-  
48  
49 475 response to the virus, it is hypothesized that the CoLab-score could also be sensitive to future  
50  
51 476 SARS-CoV-2 variants. This is supported by the fact that the discriminative ability is sustained  
52  
53 477 in periods with different dominant variants, although the sensitivity of scores  $\geq 3$  is somewhat  
54  
55 478 lower in the third phase (see **Supplemental Material 2 Table 1**). Although vaccination status  
56  
57 479 is not registered for all presenting patients, in a small subgroup of 12 patients for whom

1  
2  
3 480 vaccination status was registered, and were COVID-19 positive, 8 of 12 patients had the  
4  
5 481 highest CoLab-score (= 5) (see **Supplemental Material 2 Figure 2**). Continuous assessment  
6  
7 482 of the performance of the CoLab-score is required due to the emergence of new variants and  
8  
9 483 changes in the host's immune response.

10  
11  
12  
13 484 To conclude, the CoLab-score developed and validated in this study, based on 10 routine  
14  
15 485 laboratory results and age, is available within 1 hour for any patient presenting at the ED  
16  
17 486 where routine blood testing is requested. The score can be used by clinicians to guide PCR  
18  
19 487 testing or triage patients and helps to identify COVID-19 in patients presenting at the ED with  
20  
21 488 abdominal pain, chest pain, shortness of breath, syncope, sepsis or other non-specific  
22  
23 489 complaints where a routine blood panel is requested. The lowest CoLab-score can be used to  
24  
25 490 effectively rule-out a possible SARS-CoV-2 infection, the highest score to alert physicians to  
26  
27 491 a possible infection. The CoLab-score is therefore a valuable tool to rule out COVID-19,  
28  
29 492 guide PCR testing and is available to any center with access to routine laboratory tests.  
30  
31  
32  
33  
34  
35  
36

### 37 494 **Data Availability Statement**

38  
39  
40 495 Datasets with source data for Table 1, Figure 2 and Table 4, as well the R-code to fit the  
41  
42 496 model is available from a Dryad repository [31].  
43  
44

### 45 497 46 47 48 498 **Funding statement**

49  
50 499 This was an investigator-initiated study and no funding was received for this study.  
51  
52  
53

54 500  
55  
56  
57  
58  
59  
60

## 501 **Competing interests**

502 A-KB reports no conflict of interest. RD reports no conflict of interest. MM reports no  
503 conflict of interest. HA reports no conflict of interest. RvB reports no conflict of interest. WT  
504 reports no conflict of interest. SB reports not conflict of interest. ML reports no conflict of  
505 interest. RM reports no conflict of interest. MB reports no conflict of interest. JK reports no  
506 conflict of interest. MM reports no conflict of interest. JvS reports no conflict of interest. NvR  
507 reports no conflict of interest. VS reports no conflict of interest.

508

## 509 **Author contributorship statement**

510 Arjen-Kars Boer: Conceptualization (Lead), Data curation (Lead), Funding acquisition  
511 (Lead), Investigation (Equal), Methodology (Equal), Supervision (Equal), Writing-original  
512 draft (Equal), Writing-review & editing (Equal).

513 Ruben Deneer: Data curation (Equal), Formal analysis (Equal), Investigation (Equal),  
514 Methodology (Lead), Software (Lead), Visualization (Lead), Writing-original draft (Equal),  
515 Writing-review & editing (Equal).

516 Maaïke Maas: Conceptualization (Supporting), Resources (Supporting), Supervision  
517 (Supporting), Validation (Supporting), Writing-review & editing (Equal).

518 Heidi Ammerlaan: Conceptualization (Supporting), Resources (Supporting), Supervision  
519 (Supporting), Validation (Equal), Writing-review & editing (Equal).

520 Roland van Balkom: Conceptualization (Supporting), Resources (Supporting), Supervision  
521 (Supporting), Validation (Supporting), Writing-review & editing (Equal).

522 Wendy Thijssen: Conceptualization (Supporting), Resources (Supporting), Supervision  
523 (Supporting), Validation (Supporting), Writing-review & editing (Equal).



- 1  
2  
3 524 Sophie Bennenbroek: Conceptualization (Supporting), Resources (Supporting), Supervision  
4  
5 525 (Supporting), Validation (Supporting), Writing-review & editing (Equal).  
6  
7  
8 526 Mathie Leers: Resources (Equal), Validation (Equal), Writing-review & editing (Equal).  
9  
10  
11 527 Remy Martens: Resources (Equal), Validation (Equal), Writing-review & editing (Equal).  
12  
13  
14 528 Madelon M. Buijs: Resources (Equal), Validation (Equal), Writing-review & editing (Equal).  
15  
16  
17 529 Jos Kerremans: Resources (Equal), Validation (Equal), Writing-review & editing (Equal).  
18  
19  
20 530 Muriël Messchaert: Resources (Equal), Validation (Equal), Writing-review & editing (Equal).  
21  
22  
23 531 Jeroen van Suijlen: Resources (Supporting), Validation (Supporting), Writing-review &  
24  
25 532 editing (Equal).  
26  
27  
28 533 Natal A.W. van Riel: Methodology (Supporting), Resources (Supporting), Supervision  
29  
30 534 (Equal), Writing-review & editing (Equal).  
31  
32  
33 535 Volkher Scharnhorst: Conceptualization (Equal), Funding acquisition (Equal), Project  
34  
35 536 administration (Lead), Resources (Equal), Supervision (Lead), Writing-review & editing  
36  
37 537 (Equal).  
38  
39  
40  
41  
42  
43  
44  
45  
46  
47  
48  
49  
50  
51  
52  
53  
54  
55  
56  
57  
58  
59  
60

539 **References**

- 540
- 541 1 Coronavirus Disease (COVID-19) Situation Reports.  
542 <https://www.who.int/emergencies/diseases/novel-coronavirus-2019/situation-reports/>  
543 (accessed 4 Feb 2021).
- 544 2 Guan W, Ni Z, Hu Y, *et al.* Clinical Characteristics of Coronavirus Disease 2019 in  
545 China. <https://doi.org/10.1056/NEJMoa2002032> 2020;**382**:1708–20.  
546 doi:10.1056/NEJMOA2002032
- 547 3 Vetter P, Vu DL, L’Huillier AG, *et al.* Clinical features of covid-19. *BMJ* 2020;**369**.  
548 doi:10.1136/BMJ.M1470
- 549 4 Wynants L, Van Calster B, Collins GS, *et al.* Prediction models for diagnosis and  
550 prognosis of covid-19: Systematic review and critical appraisal. *BMJ* 2020;**369**:18.  
551 doi:10.1136/bmj.m1328
- 552 5 Albahri AS, Hamid RA, Alwan J k., *et al.* Role of biological Data Mining and Machine  
553 Learning Techniques in Detecting and Diagnosing the Novel Coronavirus (COVID-  
554 19): A Systematic Review. *J. Med. Syst.* 2020;**44**:122. doi:10.1007/s10916-020-01582-  
555 x
- 556 6 Hooli S, King C. Generalizability of Coronavirus Disease 2019 (COVID-19) Clinical  
557 Prediction Models. *Clin Infect Dis* 2020;**71**:897–897. doi:10.1093/cid/ciaa417
- 558 7 Prokop M, Everdingen W van, Vellinga T van R, *et al.* CO-RADS: A Categorical CT  
559 Assessment Scheme for Patients Suspected of Having COVID-19—  
560 Definition and Evaluation. <https://doi.org/10.1148/radiol2020201473> 2020;**296**:E97–  
561 104. doi:10.1148/RADIOL.2020201473

- 1  
2  
3 562 8 Goodacre S, Thomas B, Sutton L, *et al.* Derivation and validation of a clinical severity  
4  
5 563 score for acutely ill adults with suspected COVID-19: The PRIEST observational  
6  
7 564 cohort study. *PLoS One* 2021;**16**:e0245840. doi:10.1371/JOURNAL.PONE.0245840  
9
- 10 565 9 Plante TB, Blau AM, Berg AN, *et al.* Development and external validation of a  
11  
12 566 machine learning tool to rule out COVID-19 among adults in the emergency  
13  
14 567 department using routine blood tests: A large, multicenter, real-world study. *J Med*  
15  
16 568 *Internet Res* 2020;**22**:e24048. doi:10.2196/24048  
17
- 18 569 10 Soltan AAS, Kouchaki S, Zhu T, *et al.* Rapid triage for COVID-19 using routine  
19  
20 570 clinical data for patients attending hospital: development and prospective validation of  
21  
22 571 an artificial intelligence screening test. *Lancet Digit Heal* 2021;**3**:e78–87.  
23  
24 572 doi:10.1016/S2589-7500(20)30274-0  
25
- 26 573 11 R Core Team. R: A Language and Environment for Statistical Computing.  
27  
28 574 2020. <https://www.r-project.org/>  
29
- 30 575 12 Zou H. The adaptive lasso and its oracle properties. *J Am Stat Assoc* 2006;**101**:1418–  
31  
32 576 29. doi:10.1198/016214506000000735  
33
- 34 577 13 Tibshirani R. Regression Shrinkage and Selection Via the Lasso. *J R Stat Soc Ser B*  
35  
36 578 1996;**58**:267–88. doi:10.1111/j.2517-6161.1996.tb02080.x  
37
- 38 579 14 Friedman J, Hastie T, Tibshirani R. Regularization paths for generalized linear models  
39  
40 580 via coordinate descent. *J Stat Softw* 2010;**33**:1–22. doi:10.18637/jss.v033.i01  
41
- 42 581 15 King G, Zeng L. Logistic Regression in Rare Events Data. *Polit Anal* 2001;**9**:137–63.  
43  
44 582 doi:10.1093/oxfordjournals.pan.a004868  
45
- 46 583 16 Efron B. Estimating the error rate of a prediction rule: Improvement on cross-  
47  
48 584 validation. *J Am Stat Assoc* 1983;**78**:316–31. doi:10.1080/01621459.1983.10477973  
49  
50  
51  
52  
53  
54  
55  
56  
57  
58  
59  
60

- 1  
2  
3 585 17 Robin X, Turck N, Hainard A, *et al.* pROC: An open-source package for R and S+ to  
4  
5 586 analyze and compare ROC curves. *BMC Bioinformatics* 2011;**12**:77. doi:10.1186/1471-  
6  
7 587 2105-12-77  
8  
9  
10 588 18 Harrell Jr FE. rms: Regression Modeling Strategies. 2021. [https://cran.r-](https://cran.r-project.org/package=rms)  
11  
12 589 [project.org/package=rms](https://cran.r-project.org/package=rms)  
13  
14  
15 590 19 Ricós C, Alvarez V, Cava F, *et al.* Current databases on biological variation: Pros, cons  
16  
17 591 and progress. *Scand. J. Clin. Lab. Invest.* 1999;**59**:491–500.  
18  
19 592 doi:10.1080/00365519950185229  
20  
21  
22  
23 593 20 Brinati D, Campagner A, Ferrari D, *et al.* Detection of COVID-19 Infection from  
24  
25 594 Routine Blood Exams with Machine Learning: A Feasibility Study. *J Med Syst*  
26  
27 595 2020;**44**:1–12. doi:10.1007/s10916-020-01597-4  
28  
29  
30  
31 596 21 Joshi RP, Pejaver V, Hammarlund NE, *et al.* A predictive tool for identification of  
32  
33 597 SARS-CoV-2 PCR-negative emergency department patients using routine test results. *J*  
34  
35 598 *Clin Virol* 2020;**129**:104502. doi:10.1016/j.jcv.2020.104502  
36  
37  
38  
39 599 22 Qin L, Yang Y, Cao Q, *et al.* A predictive model and scoring system combining  
40  
41 600 clinical and CT characteristics for the diagnosis of COVID-19. *Eur Radiol*  
42  
43 601 2020;**30**:6797–807. doi:10.1007/s00330-020-07022-1  
44  
45  
46 602 23 Kurstjens S, van der Horst A, Herpers R, *et al.* Rapid identification of SARS-CoV-2-  
47  
48 603 infected patients at the emergency department using routine testing. *Clin Chem Lab*  
49  
50 604 *Med* 2020;**58**:1587–93. doi:10.1515/cclm-2020-0593  
51  
52  
53  
54 605 24 Fink DL, Khan PY, Goldman N, *et al.* Development and internal validation of a  
55  
56 606 diagnostic prediction model for COVID-19 at time of admission to hospital. *QJM An*  
57  
58 607 *Int J Med* Published Online First: 9 November 2020. doi:10.1093/qjmed/hcaa305  
59  
60

- 1  
2  
3 608 25 Giamello JD, Paglietta G, Cavalot G, *et al.* A simple tool to help ruling-out Covid-19  
4  
5 609 in the emergency department: derivation and validation of the LDH-CRP-Lymphocyte  
6  
7 610 (LCL) score. *Emerg Care J* 2020;**16**. doi:10.4081/ecj.2020.9336  
8  
9  
10 611 26 Tordjman M, Mekki A, Mali RD, *et al.* Pre-test probability for SARS-Cov-2-related  
11  
12 612 infection score: The PARIS score. *PLoS One* 2020;**15**:e0243342.  
13  
14 613 doi:10.1371/journal.pone.0243342  
15  
16  
17  
18 614 27 Peto T, Affron D, Afrough B, *et al.* COVID-19: Rapid antigen detection for SARS-  
19  
20 615 CoV-2 by lateral flow assay: A national systematic evaluation of sensitivity and  
21  
22 616 specificity for mass-testing. *EClinicalMedicine* 2021;**36**:100924.  
23  
24 617 doi:10.1016/J.ECLINM.2021.100924  
25  
26  
27  
28 618 28 García-Fiñana M, Hughes DM, Cheyne CP, *et al.* Performance of the Innova SARS-  
29  
30 619 CoV-2 antigen rapid lateral flow test in the Liverpool asymptomatic testing pilot:  
31  
32 620 population based cohort study. *BMJ* 2021;**374**:1637. doi:10.1136/BMJ.N1637  
33  
34  
35  
36 621 29 Ford JS, Parikh A, Sandhu R, *et al.* Testing Asymptomatic Emergency Department  
37  
38 622 Patients for Coronavirus Disease 2019 (COVID-19) in a Low-prevalence Region.  
39  
40 623 *Acad. Emerg. Med.* 2020;**27**:771–4. doi:10.1111/acem.14044  
41  
42  
43 624 30 Ravani P, Saxinger L, Chandran U, *et al.* COVID-19 screening of asymptomatic  
44  
45 625 patients admitted through emergency departments in Alberta: a prospective quality-  
46  
47 626 improvement study. *C Open* 2020;**8**:E887–94. doi:10.9778/cmajo.20200191  
48  
49  
50  
51 627 [dataset] 31 Boer A-K, Deneer R. Source data for: Development and validation of an early  
52  
53 628 warning score to identify COVID-19 in the emergency department based on routine  
54  
55 629 laboratory tests: a multicenter case-control study. *Dryad Digit Repos* Published Online  
56  
57 630 First: 2021. doi:https://doi.org/10.5061/dryad.5hqbzkh6x  
58  
59  
60

1  
2  
3 632 **Figure legends**

4  
5  
6 633  
7  
8  
9 634 **Figure 1: Inclusion flow of patients in the development (A) and temporal validation (B)**  
10  
11 635 **dataset.**

12  
13  
14 636 *All patient admissions with routine venous blood sampling at the emergency department (ED)*  
15  
16 637 *were included. For the development dataset, completeness of the lab panel was assessed for*  
17  
18 638 *all 28 laboratory tests, for the temporal validation dataset this was only necessary for 10*  
19  
20 639 *laboratory tests. The major causes of missingness are described in the text. In the*  
21  
22 640 *development dataset, presentations with extreme values ( $>10$  SD) were excluded. The same*  
23  
24 641 *limits were applied to the temporal validation dataset (see Table 2 for limits).*

25  
26  
27  
28 642  
29  
30  
31 643 **Figure 2: Probability density plot of the CoLab-linear predictor.**

32  
33  
34 644 *The probability density plots for COVID (dark grey) and non-COVID patients (light grey) are*  
35  
36 645 *plotted against the linear predictor (see table 2). The CoLab-score cut-offs ( $-5.83$ ,  $-4.02$ ,  $-$*   
37  
38 646  *$3.29$ ,  $-2.34$  and  $-1.64$ ) are depicted with vertical dashed lines. The white-boxed numbers*  
39  
40 647 *(between the cut-offs) represent the corresponding CoLab-score. Note that while the area*  
41  
42 648 *under both curves is identical (since these are probability density functions), in absolute*  
43  
44 649 *numbers the “negative or untested”-group is about 36 times larger than the PCR positive*  
45  
46 650 *group.*

47  
48  
49  
50  
51 651  
52  
53  
54 652 **Figure 3: Inclusion flow of ED patients in three external centers.**

55  
56  
57 653 *All emergency department (ED) presentations with routine venous blood sampling were*  
58  
59 654 *included. Missingness of lab panels was assessed for the 11 variables in the CoLab-score (see*  
60

1  
2  
3 655 *Table 2). Re-presentations after a positive PCR result or clinical COVID-19 registration were*  
4  
5 656 *excluded as “previous COVID-19+”. Presentations with any laboratory result above the*  
6  
7 657 *limits of the CoLab-score (see Table 2) were excluded.*  
8  
9  
10  
11  
12  
13  
14  
15  
16  
17  
18  
19  
20  
21  
22  
23  
24  
25  
26  
27  
28  
29  
30  
31  
32  
33  
34  
35  
36  
37  
38  
39  
40  
41  
42  
43  
44  
45  
46  
47  
48  
49  
50  
51  
52  
53  
54  
55  
56  
57  
58  
59  
60

For peer review only



1  
2  
3  
4  
5  
6  
7  
8  
9  
10  
11  
12  
13  
14  
15  
16  
17  
18  
19  
20



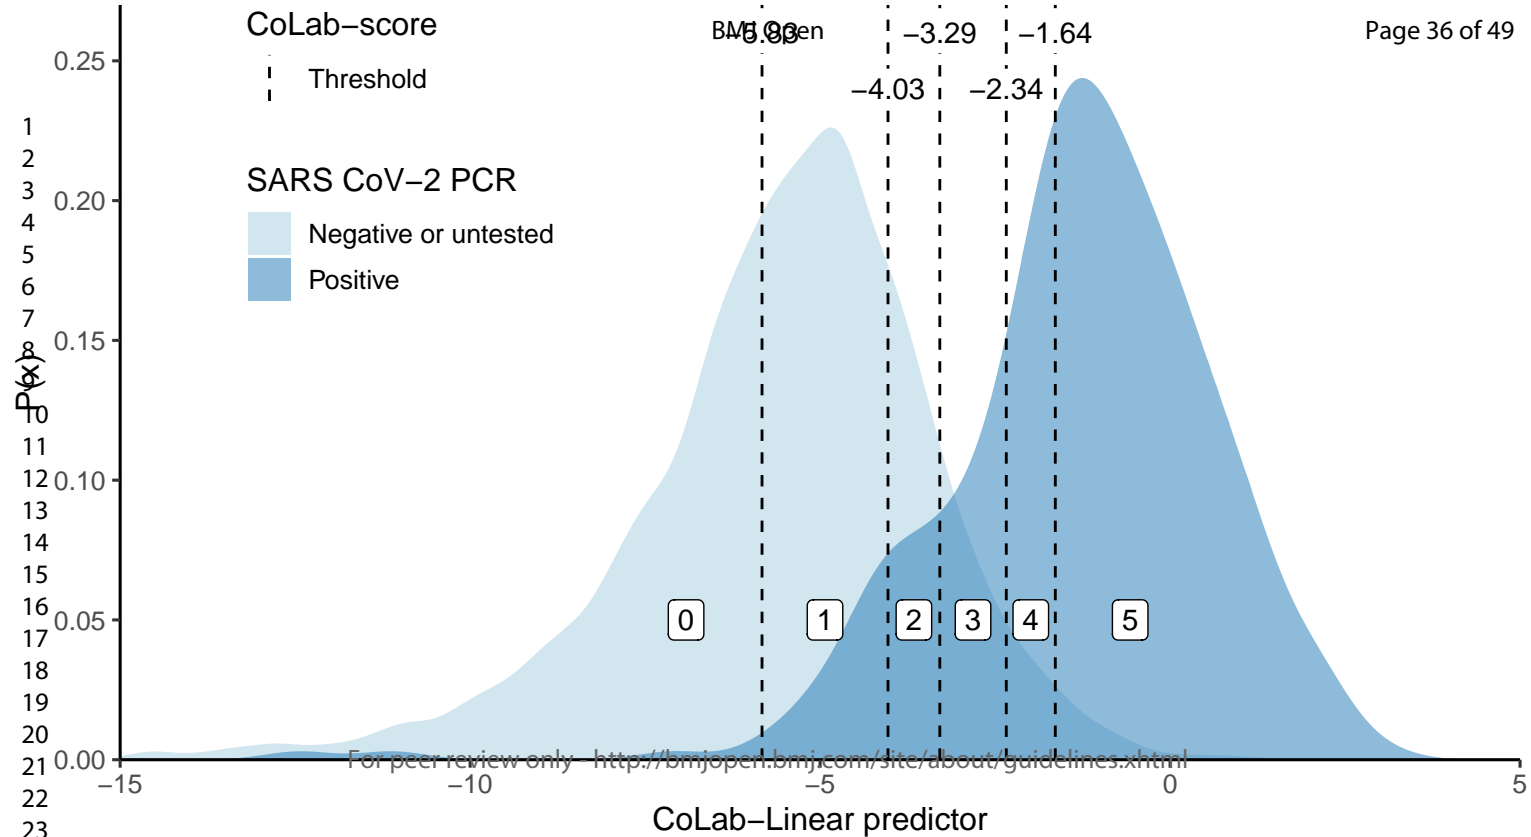

### Center 1

### Center 2

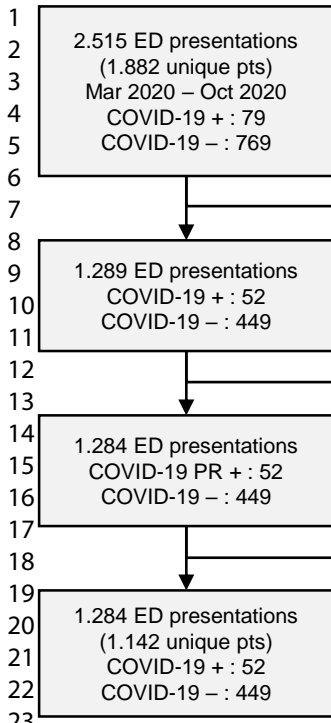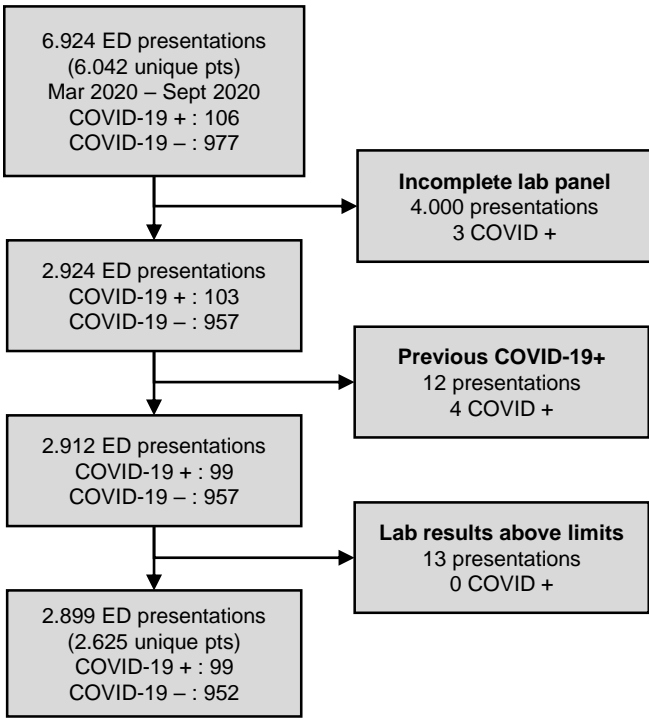

### Center 3

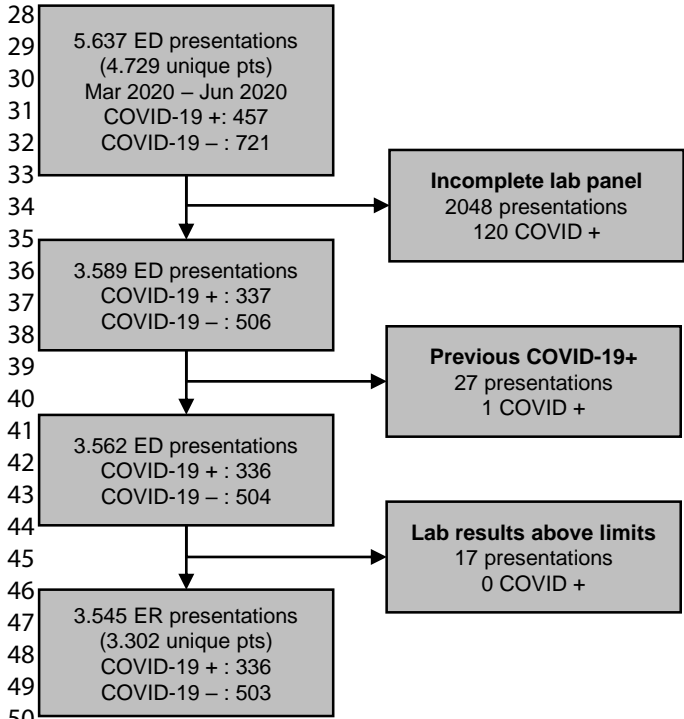

## Supplemental material 1

### Model fitting

Prior to model fitting, covariates were scaled to zero mean and unit variance, after model fitting coefficients were unscaled to obtain regression coefficients on the original scale. In adaptive lasso, weights are applied to each of the covariates present in the lasso constraint, the weight vector has to be calculated before the adaptive lasso regression is performed. Due to multicollinearity between laboratory tests in the routine lab panel, weights in the adaptive lasso were based on ridge regression estimates ( $\hat{\beta}_{ridge}$ ) as recommended by Zou. To obtain  $\hat{\beta}_{ridge}$  the optimal penalty ( $\lambda$ ) for the ridge regression was chosen using 10 fold cross-validation (CV) with area under the ROC curve (AUC) as the loss function. The  $\lambda$  corresponding to the maximum AUC was selected to obtain  $\hat{\beta}_{ridge}$ . The weight vector ( $\hat{w}$ ) was calculated by  $\hat{w} = 1/|\hat{\beta}_{ridge}|^2$ . This weight vector was then used to fit an adaptive lasso regression where  $\lambda$  was chosen by the criterion  $\pm 1$  SE of the maximum AUC.

### Model intercept correction

The linear predictor for a patient  $i$  is calculated as follows:  $lp_i = \beta_0 + \beta_1 x_{i1} + \dots + \beta_n x_{in}$ . Where  $n$  is the number of variables in the final model,  $x_{in}$  are the observed predictor variables for subject  $i$  and  $\beta_n$  the model coefficients. The linear predictor can then be converted to a probability for patient  $i$  ( $P_i$ ) by the logistic function:  $P_i = \frac{1}{1+e^{-lp_i}}$

The intercept term  $\beta_0$  is sensitive to the fraction of cases versus controls in the dataset/population. Since the model is fitted to a case-control dataset where the number cases is fixed (all patients tested positive for COVID-19) and the number of controls is randomly chosen (a 6-month period pre-COVID), the intercept term  $\beta_0$  is a result of this choice and will likely not be generalizable to the real-world setting. Prior correction is a method to correct the estimate of the intercept based on the true fraction of positives in the population,  $\tau$  (prevalence of COVID-19 in the ED) and the fraction of cases in the development dataset,  $\bar{y}$ . The intercept term  $\beta_0$  can then be corrected to obtain  $\beta_{0corrected}$  using the following formula:

$$\beta_{0corrected} = \beta_0 + \beta_{adj}$$

$$\beta_{adj} = -\ln \left[ \left( \frac{1-\tau}{\tau} \right) \left( \frac{\bar{y}}{1-\bar{y}} \right) \right]$$

In our dataset  $\bar{y} = 0.02675$  therefore:

$$\beta_{adj} = -\ln \left( \frac{1-\tau}{\tau} \right) + 3.594$$

An estimate  $\bar{\tau}$  can be used for the prevalence  $\tau$  to obtain  $\bar{\beta}_{adj}$  which can be plugged in the original linear predictor formula to obtain calibrated probabilities:

$$lp_i(\tau) = \beta_0 - \ln \left( \frac{1-\tau}{\tau} \right) + 3.594 + \beta_1 x_{i1} + \dots + \beta_n x_{in}$$

## CoLab-score

An alternative, which is the basis of the CoLab-score, is to choose a fixed probability  $P_i$  above which one considers a patient eligible for further testing. The probability can be expressed as a number needed to test. If one is willing to test 10 patients to find one positive, all patients with  $P_i \geq 0.1$  should be considered positive. In this study a number needed to test of 15 is used, therefore all patients with a  $P_i \geq 0.067$  should be considered positive. On the linear predictor scale this translates to  $\text{logit}(0.067) = -2.639$ . To determine the cutoffs for difference prevalence thresholds one solves the following equation:

$$\beta_0 + \beta_{adj} + \beta_1 x_{i1} + \dots + \beta_n x_{in} \geq -2.639$$

$$\beta_0 + \beta_1 x_{i1} + \dots + \beta_n x_{in} \geq -2.639 - \beta_{adj}$$

$$lp_i(\tau) \geq \ln\left(\frac{1-\tau}{\tau}\right) - 6.233$$

Choosing values for  $\tau$  yields the cutoffs for the CoLab score:

$$lp_i(\tau = 0.4) \geq -5.83 \text{ (CoLab-score} = 1)$$

$$lp_i(\tau = 0.1) \geq -4.03 \text{ (CoLab-score} = 2)$$

$$lp_i(\tau = 0.05) \geq -3.29 \text{ (CoLab-score} = 3)$$

$$lp_i(\tau = 0.02) \geq -2.34 \text{ (CoLab-score} = 4)$$

$$lp_i(\tau = 0.01) \geq -1.64 \text{ (CoLab-score} = 5)$$

These thresholds correspond to CoLab-scores 0 to 5. The interpretation of these scores is as follows; if the prevalence is <1%, only CoLab-score 5 should be classified as positive and CoLab-score 0 till 4 as negative. If the prevalence is 1% – 2%, CoLab-score 4 and 5 should be classified as positive and 1 – 3 negative. Similarly, with a prevalence of 2 – 5% the split is between CoLab-score 2 and 3 and with prevalence of 5 – 10% between CoLab-score 1 – 2. If the prevalence is higher than 10% only CoLab-score 0 is classified as negative. Using the CoLab-score in this fashion, aims to preserve a number need to test of 15.

## Relative importance of variables

Since the variables included in the model are on different scales, the magnitude of the unscaled coefficients cannot be used to compare the importance of variables to each other. To give some indication of the importance of the variables in predicting the outcome, the unscaled coefficients obtained from the adaptive lasso regression were used to calculate the relative importance. The variable with the highest unscaled coefficient was used as maximum ( $\beta_{unscaled,max}$ ), and all other scaled coefficients were divided by this maximum and multiplied by 100 to obtain the relative importance in %:  $\frac{\beta_{unscaled}}{\beta_{unscaled,max}} \cdot 100$ .

## Supplemental material 2

### Vaccination status and COVID-19 ED prevalence plot

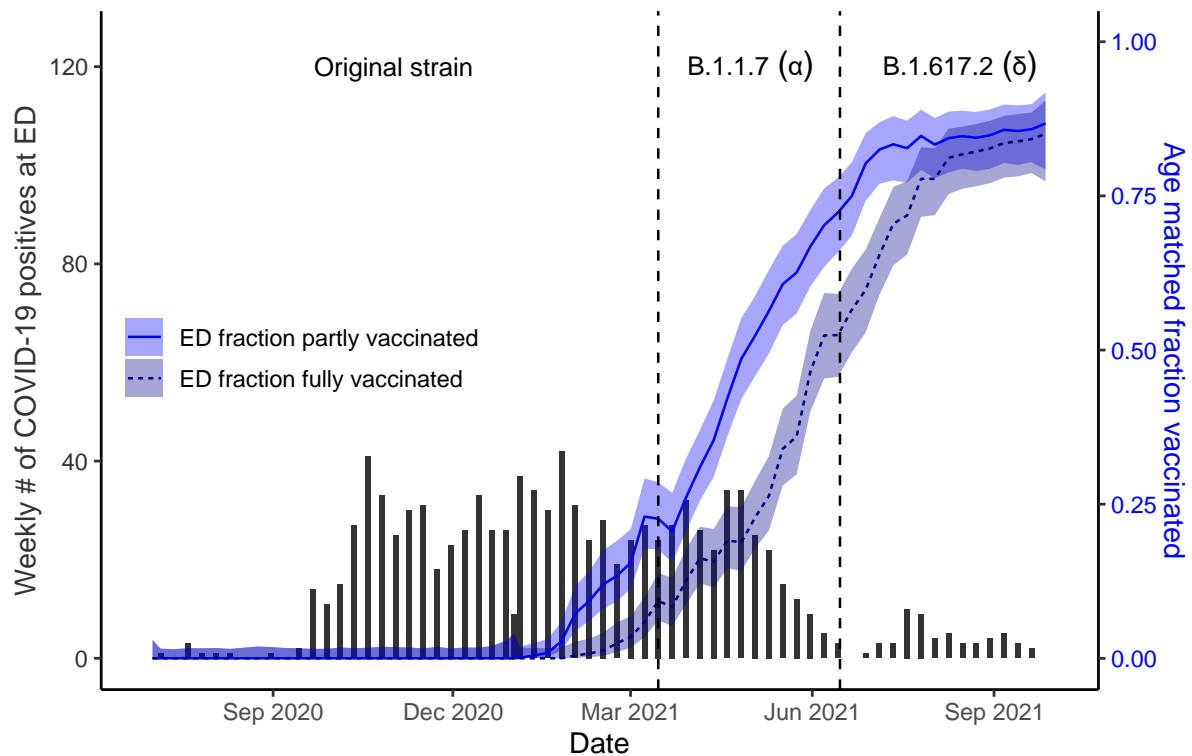

**Figure 1: Temporal validation period split into three phases characterized by weekly number of new COVID-19 cases at the emergency department (ED) and estimated fraction of ED patients vaccinated.**

The temporal validation dataset consists of ED presentations from July 2020 until October 2021. As stated in the “Materials and Methods” section, this period was split into three phases: i) from July 2020 until March 2021, no vaccination and no variants of concern identified ii) from March 2021 until June 2021, partial vaccination and B.1.1.7 (Alpha) variant identified as dominant iii) from June 2021 until October 2021, widespread vaccination and B.1.617.2 (Delta) variant identified as dominant. The ED fraction vaccinated is estimated by merging data from the Dutch national institute of public health by the date of the ED presentation and the year of birth of the patient. The gray bars depict weekly number of new COVID-19 cases at the ED, the blue lines the estimated fraction of ED patients fully or partially vaccinated.

## CoLab-score performance

| Phase                                | Cases/controls (prevalence) | AUC                   |
|--------------------------------------|-----------------------------|-----------------------|
| Original strain & no vaccinations    | 694/7999 (8.6%)             | 0.909 (0.896 - 0.923) |
| B.1.1.7 strain & partial vaccination | 287/2845 (10.1%)            | 0.937 (0.921 - 0.953) |
| B.1.617.2 strain & full vaccination  | 58/3236 (1.8%)              | 0.898 (0.857 - 0.939) |

| CoLab-score | Phase                                | Sensitivity           | Specificity           | PPV                   | NPV                   |
|-------------|--------------------------------------|-----------------------|-----------------------|-----------------------|-----------------------|
| 0           | Original strain & no vaccinations    | 0.960 (0.944 - 0.974) | 0.418 (0.407 - 0.429) | 0.135 (0.133 - 0.138) | 0.991 (0.987 - 0.994) |
|             | B.1.1.7 strain & partial vaccination | 0.983 (0.969 - 0.997) | 0.432 (0.413 - 0.450) | 0.162 (0.158 - 0.168) | 0.996 (0.992 - 0.999) |
|             | B.1.617.2 strain & full vaccination  | 0.983 (0.948 - 1.000) | 0.415 (0.396 - 0.432) | 0.030 (0.028 - 0.031) | 0.999 (0.998 - 1.000) |
| ≤1          | Original strain & no vaccinations    | 0.879 (0.854 - 0.902) | 0.789 (0.779 - 0.798) | 0.283 (0.273 - 0.294) | 0.986 (0.983 - 0.988) |
|             | B.1.1.7 strain & partial vaccination | 0.916 (0.885 - 0.948) | 0.809 (0.793 - 0.824) | 0.350 (0.332 - 0.370) | 0.989 (0.984 - 0.993) |
|             | B.1.617.2 strain & full vaccination  | 0.862 (0.776 - 0.948) | 0.780 (0.765 - 0.794) | 0.067 (0.059 - 0.074) | 0.997 (0.995 - 0.999) |
| ≤2          | Original strain & no vaccinations    | 0.813 (0.784 - 0.842) | 0.894 (0.887 - 0.901) | 0.421 (0.404 - 0.441) | 0.980 (0.978 - 0.983) |
|             | B.1.1.7 strain & partial vaccination | 0.864 (0.826 - 0.902) | 0.897 (0.885 - 0.908) | 0.484 (0.455 - 0.516) | 0.983 (0.979 - 0.988) |
|             | B.1.617.2 strain & full vaccination  | 0.690 (0.569 - 0.810) | 0.892 (0.881 - 0.902) | 0.104 (0.086 - 0.123) | 0.994 (0.991 - 0.996) |
| ≤3          | Original strain & no vaccinations    | 0.697 (0.661 - 0.731) | 0.962 (0.957 - 0.966) | 0.634 (0.605 - 0.662) | 0.971 (0.968 - 0.974) |
|             | B.1.1.7 strain & partial vaccination | 0.760 (0.711 - 0.812) | 0.963 (0.955 - 0.970) | 0.696 (0.650 - 0.739) | 0.973 (0.967 - 0.978) |
|             | B.1.617.2 strain & full vaccination  | 0.621 (0.483 - 0.741) | 0.960 (0.954 - 0.967) | 0.222 (0.178 - 0.268) | 0.993 (0.990 - 0.995) |
| ≤4          | Original strain & no vaccinations    | 0.566 (0.529 - 0.602) | 0.984 (0.981 - 0.987) | 0.775 (0.740 - 0.808) | 0.960 (0.957 - 0.963) |
|             | B.1.1.7 strain & partial vaccination | 0.645 (0.589 - 0.704) | 0.983 (0.978 - 0.988) | 0.809 (0.762 - 0.856) | 0.961 (0.955 - 0.967) |
|             | B.1.617.2 strain & full vaccination  | 0.517 (0.397 - 0.638) | 0.986 (0.982 - 0.990) | 0.400 (0.319 - 0.500) | 0.991 (0.989 - 0.993) |

**Table 1: Diagnostic performance of the CoLab-score in the temporal validation dataset, split by phase.**

Sensitivities, specificities, positive predictive values (PPV) and negative predictive values (NPV) are shown for fixed cut-offs (CoLab-score 0 till  $\leq 4$ ) with bootstrapped 95% confidence intervals in parentheses. The temporal validation dataset is split into three phases according to dominant SARS-CoV-2 strains in the Netherlands and estimated fraction of ED patients vaccinated (see Figure above). Note that “0” lists the sensitivity and NPV of CoLab-score 0 and “ $\leq 4$ ” lists the specificity and PPV of CoLab-score 5. The AUC was significantly higher in the second phase as compared to the first phase (DeLong test p-value: 0.0175), but did not differ significantly between the third and first phase (DeLong test p-value: 0.3903).



**Figure 2: Boxplots of CoLab linear predictor versus COVID-19 positive, split by registered vaccination status.**

The CoLab linear predictor is calculated for all ED presentations in the temporal validation set. Presentations who are registered as vaccinated are labeled TRUE ( $N = 13$ ).

Presentations before vaccine roll-out are labeled FALSE ( $N = 5855$ ). Presentations during

1  
2  
3 *vaccine roll-out but where no status is registered are labeled NA (N = 8212). Of the 13*  
4  
5 *presentations who were registered as vaccinated, 12 were COVID-19 positive and 1 negative.*  
6  
7 *Note that vaccination status is only registered if a patient is SARS-CoV-2 PCR positive or*  
8  
9 *considered positive until proven otherwise, therefore there is only one COVID-19 negative*  
10  
11 *patient with a registered vaccination status.*  
12  
13  
14  
15  
16  
17  
18  
19  
20  
21  
22  
23  
24  
25  
26  
27  
28  
29  
30  
31  
32  
33  
34  
35  
36  
37  
38  
39  
40  
41  
42  
43  
44  
45  
46  
47  
48  
49  
50  
51  
52  
53  
54  
55  
56  
57  
58  
59  
60

For peer review only



## Supplemental material 3



**Figure 1: CoLab-score calibration plots of the temporal validation (A), external validation center 1 (B), external validation center 2 (C) and external validation center 3 (D).**

*In the calibration plots, the proportion of observed COVID-19 positives versus expected probabilities are plotted. Observations are grouped with an average of 150 observations per group. The expected probabilities follow from applying the inverse logit function to the CoLab-linear predictor calculated from Table 2. If the observed proportion in an external dataset is lower than the expected proportion, this means risks are over-estimated, if the observed fraction is higher, risks are under-estimated. Ideally, observed proportions are equal to expected proportions, this ideal-calibration-line is shown as a straight line through the origin with a slope of 1. The logistic calibration line is a logistic regression fit of the predicted probabilities. [Intercept, slope] for plots A-D: A [1.34, 1.08], B [-0.39, 0.92], C [-0.76, 0.77], D [0.08, 0.79]. Although no validation datasets show perfect calibration, this is the result of differences in COVID-19 prevalence in the temporal validation dataset (7.4% versus 2.2%) and differences in calibration of laboratory equipment in the three external centers.*

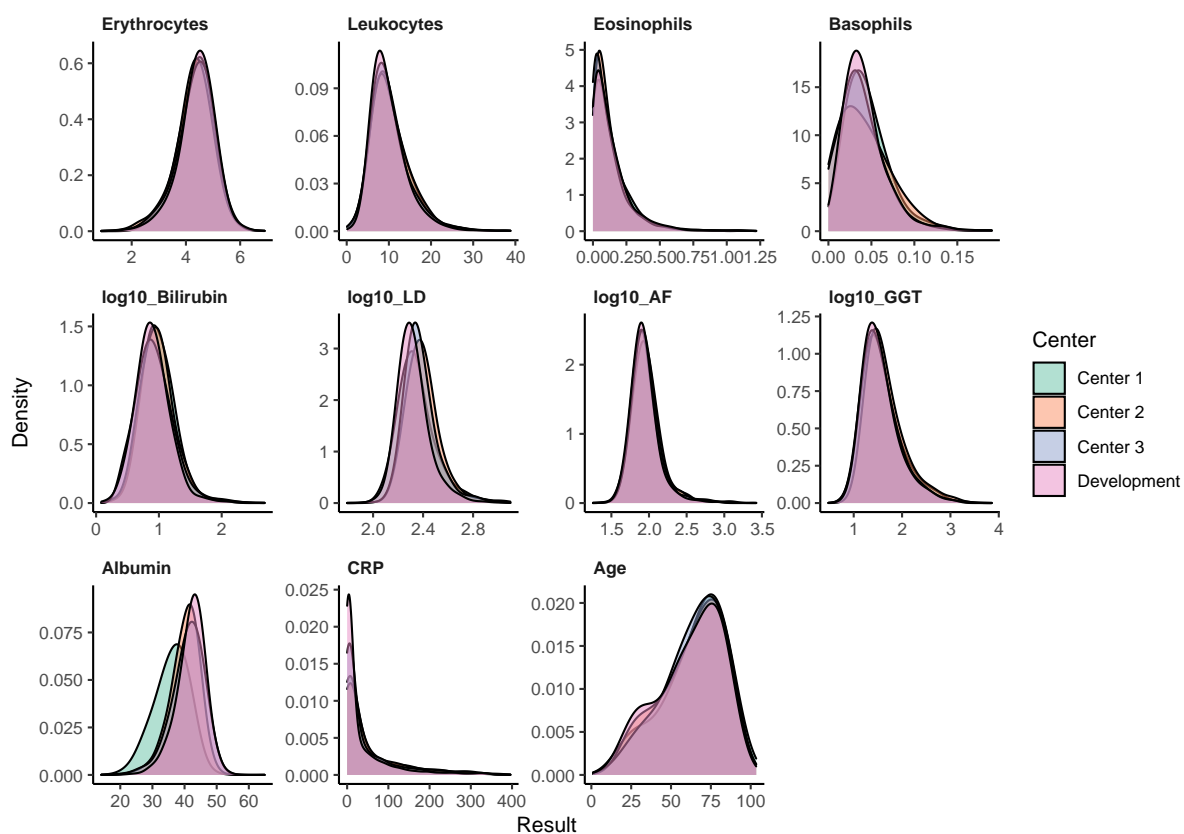

**Figure 2: Probability density plots of laboratory parameters.**

Probability density plots are shown for all control patients of the development dataset and the three external centers. Ideally all distributions should overlap since this implies that control patient populations are most likely similar in the development dataset to the external datasets.

When comparing the distribution of the CoLab variables for all control-patients across different external validation datasets, albumin and LD show the largest deviations.

## Supplemental material 4



**Figure 1: Association between the CoLab-linear predictor and the duration of COVID-19-related symptoms.**

*For all PCR-positive ED presentations in the development and temporal validation dataset, the CoLab-linear predictor is plotted against the duration of COVID-related symptoms as registered in the electronic patient records. Patients with unknown duration are not plotted. Patients without symptoms were plotted at 0 days. The solid horizontal lines represent the CoLab-score thresholds, the dashed line is a LOESS regression curve with 95% CI. As the duration of symptoms is an integer, some random jitter was added to the days, for visualization purposes. Note that only the first 14 days are shown in this graph.*



**Figure 2: Probability density plot of CoLab-score for RS-, Rhino- and Influenza-virus PCR tested ED patients.**

*For 183 ED presentations that were PCR tested for either RS-, Rhino- and Influenza-virus the CoLab-score was calculated. 91 presentations were PCR positive, 92 were PCR negative. The CoLab-score is only marginally elevated for PCR positive patients, the area under the ROC-curve in separating both groups is 0.573 (95% CI: 0.4896-0.6563).*

| Inclusion criterion                                     | Cases/controls (prevalence) | AUC                   |
|---------------------------------------------------------|-----------------------------|-----------------------|
| Temporal validation (reference)                         | 1039/14080 (7.4%)           | 0.916 (0.906 - 0.927) |
| Only first presentations, re-presentations are excluded | 937/11166 (8.4%)            | 0.919 (0.909 - 0.930) |
| Only PCR-tested presentations                           | 372/4062 (9.2%)             | 0.840 (0.817 - 0.862) |

| CoLab-score | Validation set           | Sensitivity              | Specificity              | PPV                      | NPV                      | TP                   | TN                       | FP                    | FN                 |
|-------------|--------------------------|--------------------------|--------------------------|--------------------------|--------------------------|----------------------|--------------------------|-----------------------|--------------------|
| 0           | Reference                | 0.967<br>(0.956 - 0.978) | 0.420<br>(0.411 - 0.428) | 0.117<br>(0.115 - 0.119) | 0.994<br>(0.992 - 0.996) | 1005<br>(993 - 1016) | 5476<br>(5366 - 5587)    | 7565<br>(7454 - 7675) | 34<br>(23 - 46)    |
|             | First presentations      | 0.968<br>(0.956 - 0.979) | 0.416<br>(0.406 - 0.426) | 0.132<br>(0.130 - 0.134) | 0.993<br>(0.990 - 0.995) | 907<br>(896 - 917)   | 4259<br>(4156 - 4353)    | 5970<br>(5876 - 6073) | 30<br>(20 - 41)    |
|             | PCR-tested presentations | 0.946<br>(0.922 - 0.968) | 0.353<br>(0.338 - 0.368) | 0.129<br>(0.125 - 0.132) | 0.985<br>(0.979 - 0.991) | 352<br>(343 - 360)   | 1303<br>(1246 - 1359)    | 2387<br>(2331 - 2444) | 20<br>(12 - 29)    |
| ≤ 1         | Reference                | 0.888<br>(0.870 - 0.908) | 0.791<br>(0.783 - 0.798) | 0.253<br>(0.245 - 0.261) | 0.989<br>(0.987 - 0.991) | 923<br>(904 - 943)   | 10311<br>(10215 - 10401) | 2730<br>(2640 - 2826) | 116<br>(96 - 135)  |
|             | First presentations      | 0.890<br>(0.870 - 0.908) | 0.793<br>(0.785 - 0.801) | 0.282<br>(0.273 - 0.292) | 0.987<br>(0.985 - 0.990) | 834<br>(815 - 851)   | 8112<br>(8030 - 8194)    | 2117<br>(2035 - 2199) | 103<br>(86 - 122)  |
|             | PCR-tested presentations | 0.852<br>(0.817 - 0.887) | 0.671<br>(0.656 - 0.686) | 0.207<br>(0.197 - 0.217) | 0.978<br>(0.973 - 0.983) | 317<br>(304 - 330)   | 2477<br>(2421 - 2533)    | 1213<br>(1157 - 1269) | 55<br>(42 - 68)    |
| ≤ 2         | Reference                | 0.820<br>(0.796 - 0.843) | 0.894<br>(0.889 - 0.899) | 0.382<br>(0.367 - 0.396) | 0.984<br>(0.982 - 0.986) | 852<br>(827 - 876)   | 11661<br>(11591 - 11729) | 1380<br>(1312 - 1450) | 187<br>(163 - 212) |
|             | First presentations      | 0.824<br>(0.798 - 0.845) | 0.898<br>(0.892 - 0.904) | 0.426<br>(0.410 - 0.441) | 0.982<br>(0.980 - 0.985) | 772<br>(748 - 792)   | 9187<br>(9127 - 9249)    | 1042<br>(980 - 1102)  | 165<br>(145 - 189) |
|             | PCR-tested presentations | 0.734<br>(0.688 - 0.777) | 0.800<br>(0.786 - 0.812) | 0.270<br>(0.252 - 0.287) | 0.968<br>(0.962 - 0.973) | 273<br>(256 - 289)   | 2951<br>(2902 - 2997)    | 739<br>(693 - 788)    | 99<br>(83 - 116)   |
| ≤ 3         | Reference                | 0.710<br>(0.682 - 0.738) | 0.962<br>(0.958 - 0.965) | 0.596<br>(0.573 - 0.618) | 0.977<br>(0.974 - 0.979) | 738<br>(709 - 767)   | 12540<br>(12496 - 12582) | 501<br>(459 - 545)    | 301<br>(272 - 330) |
|             | First presentations      | 0.716<br>(0.687 - 0.744) | 0.966<br>(0.962 - 0.969) | 0.658<br>(0.633 - 0.682) | 0.974<br>(0.971 - 0.976) | 671<br>(644 - 697)   | 9880<br>(9844 - 9915)    | 349<br>(314 - 385)    | 266<br>(240 - 293) |
|             | PCR-tested presentations | 0.591<br>(0.540 - 0.640) | 0.911<br>(0.902 - 0.921) | 0.403<br>(0.370 - 0.433) | 0.957<br>(0.952 - 0.962) | 220<br>(201 - 238)   | 3363<br>(3328 - 3397)    | 327<br>(293 - 362)    | 152<br>(134 - 171) |
| ≤ 4         | Reference                | 0.585<br>(0.556 - 0.615) | 0.984<br>(0.982 - 0.987) | 0.750<br>(0.724 - 0.778) | 0.968<br>(0.965 - 0.970) | 608<br>(578 - 639)   | 12838<br>(12811 - 12866) | 203<br>(175 - 230)    | 431<br>(400 - 461) |
|             | First presentations      | 0.590<br>(0.558 - 0.621) | 0.987<br>(0.985 - 0.989) | 0.805<br>(0.776 - 0.832) | 0.963<br>(0.961 - 0.966) | 553<br>(523 - 582)   | 10095<br>(10071 - 10117) | 134<br>(112 - 158)    | 384<br>(355 - 414) |
|             | PCR-tested presentations | 0.452<br>(0.401 - 0.503) | 0.959<br>(0.953 - 0.965) | 0.526<br>(0.480 - 0.575) | 0.945<br>(0.941 - 0.950) | 168<br>(149 - 187)   | 3539<br>(3516 - 3562)    | 151<br>(128 - 174)    | 204<br>(185 - 223) |

1  
2  
3 **Table 1: Sensitivity analysis of the CoLab-score in the temporal validation dataset using**  
4 **different inclusion criteria.**  
5

6  
7 *Sensitivities, specificities, positive predictive values (PPV), negative predictive values (NPV),*  
8 *true positives (TP), true negatives (TN), false positives (FP) and false negatives (FN) are*  
9 *shown for fixed cut-offs (CoLab-score 0 till  $\leq 4$ ) with bootstrapped 95% confidence intervals*  
10 *in parentheses. The temporal validation dataset is used to compare the performance of the*  
11 *CoLab-score with inclusion criteria that differ from the development dataset. The first line*  
12 *shows the performance of the temporal validation dataset with the original inclusion criteria*  
13 *as specified in Figure 1B. The second line shows the performance of the CoLab-score when*  
14 *all re-presentations are excluded (i.e. no repeated presentations). The third line shows the*  
15 *performance of the CoLab-score in the subgroup of patients that underwent PCR-testing.*  
16  
17  
18  
19  
20  
21  
22  
23  
24  
25  
26  
27  
28  
29  
30  
31  
32  
33  
34  
35  
36  
37  
38  
39  
40  
41  
42  
43  
44  
45  
46  
47  
48  
49  
50  
51  
52  
53  
54  
55  
56  
57  
58  
59  
60



TRIPOD Checklist: Prediction Model Development and Validation

| Section/Topic                | Item | Checklist Item                                                                                                                                                                                            | Page      |
|------------------------------|------|-----------------------------------------------------------------------------------------------------------------------------------------------------------------------------------------------------------|-----------|
| <b>Title and abstract</b>    |      |                                                                                                                                                                                                           |           |
| Title                        | 1    | D;V Identify the study as developing and/or validating a multivariable prediction model, the target population, and the outcome to be predicted.                                                          | 1         |
| Abstract                     | 2    | D;V Provide a summary of objectives, study design, setting, participants, sample size, predictors, outcome, statistical analysis, results, and conclusions.                                               | 3, 4      |
| <b>Introduction</b>          |      |                                                                                                                                                                                                           |           |
| Background and objectives    | 3a   | D;V Explain the medical context (including whether diagnostic or prognostic) and rationale for developing or validating the multivariable prediction model, including references to existing models.      | 6, 7      |
|                              | 3b   | D;V Specify the objectives, including whether the study describes the development or validation of the model or both.                                                                                     | 7         |
| <b>Methods</b>               |      |                                                                                                                                                                                                           |           |
| Source of data               | 4a   | D;V Describe the study design or source of data (e.g., randomized trial, cohort, or registry data), separately for the development and validation data sets, if applicable.                               | 8, 11-12  |
|                              | 4b   | D;V Specify the key study dates, including start of accrual; end of accrual; and, if applicable, end of follow-up.                                                                                        | 8         |
| Participants                 | 5a   | D;V Specify key elements of the study setting (e.g., primary care, secondary care, general population) including number and location of centres.                                                          | 8         |
|                              | 5b   | D;V Describe eligibility criteria for participants.                                                                                                                                                       | 8, 9, S1  |
|                              | 5c   | D;V Give details of treatments received, if relevant.                                                                                                                                                     | N/A       |
| Outcome                      | 6a   | D;V Clearly define the outcome that is predicted by the prediction model, including how and when assessed.                                                                                                | 9         |
|                              | 6b   | D;V Report any actions to blind assessment of the outcome to be predicted.                                                                                                                                | N/A       |
| Predictors                   | 7a   | D;V Clearly define all predictors used in developing or validating the multivariable prediction model, including how and when they were measured.                                                         | 8, 9      |
|                              | 7b   | D;V Report any actions to blind assessment of predictors for the outcome and other predictors.                                                                                                            | N/A       |
| Sample size                  | 8    | D;V Explain how the study size was arrived at.                                                                                                                                                            | N/A       |
| Missing data                 | 9    | D;V Describe how missing data were handled (e.g., complete-case analysis, single imputation, multiple imputation) with details of any imputation method.                                                  | 9         |
| Statistical analysis methods | 10a  | D Describe how predictors were handled in the analyses.                                                                                                                                                   | 10        |
|                              | 10b  | D Specify type of model, all model-building procedures (including any predictor selection), and method for internal validation.                                                                           | 10-12, S1 |
|                              | 10c  | V For validation, describe how the predictions were calculated.                                                                                                                                           | 16        |
|                              | 10d  | D;V Specify all measures used to assess model performance and, if relevant, to compare multiple models.                                                                                                   | 11-13     |
|                              | 10e  | V Describe any model updating (e.g., recalibration) arising from the validation, if done.                                                                                                                 | N/A       |
| Risk groups                  | 11   | D;V Provide details on how risk groups were created, if done.                                                                                                                                             | N/A       |
| Development vs. validation   | 12   | V For validation, identify any differences from the development data in setting, eligibility criteria, outcome, and predictors.                                                                           | 22        |
| <b>Results</b>               |      |                                                                                                                                                                                                           |           |
| Participants                 | 13a  | D;V Describe the flow of participants through the study, including the number of participants with and without the outcome and, if applicable, a summary of the follow-up time. A diagram may be helpful. | F1        |
|                              | 13b  | D;V Describe the characteristics of the participants (basic demographics, clinical features, available predictors), including the number of participants with missing data for predictors and outcome.    | T1        |
|                              | 13c  | V For validation, show a comparison with the development data of the distribution of important variables (demographics, predictors and outcome).                                                          | S3        |
| Model development            | 14a  | D Specify the number of participants and outcome events in each analysis.                                                                                                                                 | F1, F3    |
|                              | 14b  | D If done, report the unadjusted association between each candidate predictor and outcome.                                                                                                                | N/A       |
| Model specification          | 15a  | D Present the full prediction model to allow predictions for individuals (i.e., all regression coefficients, and model intercept or baseline survival at a given time point).                             | T2        |
|                              | 15b  | D Explain how to use the prediction model.                                                                                                                                                                | T2, S1    |
| Model performance            | 16   | D;V Report performance measures (with CIs) for the prediction model.                                                                                                                                      | T3, T4    |
| Model-updating               | 17   | V If done, report the results from any model updating (i.e., model specification, model performance).                                                                                                     | N/A       |
| <b>Discussion</b>            |      |                                                                                                                                                                                                           |           |
| Limitations                  | 18   | D;V Discuss any limitations of the study (such as nonrepresentative sample, few events per predictor, missing data).                                                                                      | 21-23     |
| Interpretation               | 19a  | V For validation, discuss the results with reference to performance in the development data, and any other validation data.                                                                               | 19-20     |
|                              | 19b  | D;V Give an overall interpretation of the results, considering objectives, limitations, results from similar studies, and other relevant evidence.                                                        | 19-20     |
| Implications                 | 20   | D;V Discuss the potential clinical use of the model and implications for future research.                                                                                                                 | 20-21     |
| <b>Other information</b>     |      |                                                                                                                                                                                                           |           |
| Supplementary information    | 21   | D;V Provide information about the availability of supplementary resources, such as study protocol, Web calculator, and data sets.                                                                         | N/A       |
| Funding                      | 22   | D;V Give the source of funding and the role of the funders for the present study.                                                                                                                         | N/A       |

\*Items relevant only to the development of a prediction model are denoted by D, items relating solely to a validation of a prediction model are denoted by V, and items relating to both are denoted D;V. We recommend using the TRIPOD Checklist in conjunction with the TRIPOD Explanation and Elaboration document. S = Supplemental material, F = Figure, T = Table.
